# Supplementary material for: Molecular dynamics simulation studies of the structure and antifouling performance of a gradient polyamide membrane
Source: Royal Society of Chemistry journal article supplement (doi:10.1039/c9cp03798e), 2019-01-01
Supplement: c9cp03798e1.pdf [file c9cp03798e1.pdf]

## Supplementary Data

Molecular dynamics simulation studies on the structure and the antifouling performance of the gradient polyamide membrane

Ke Li,<sup>a</sup> Shanlong Li,<sup>a</sup> Lifen Liu,<sup>b</sup> Wei Huang,<sup>a</sup> Yuling Wang,<sup>a</sup> Chunyang Yu<sup>\*a</sup> and Yongfeng Zhou<sup>\*a</sup>

<sup>a</sup>School of Chemistry & Chemical Engineering, State Key Laboratory of Metal Matrix Composites, Shanghai Key Laboratory of Electrical Insulation and Thermal Aging, Shanghai Jiao Tong University, 800 Dongchuan Road, Shanghai, 200240, China.

<sup>b</sup>Center for Membrane and Water Science & Technology, Ocean College, Zhejiang University of Technology, Hangzhou, 310014, China.

□E-mail: [chunyangyu@sjtu.edu.cn](mailto:chunyangyu@sjtu.edu.cn) (C. Yu); [yfzhou@sjtu.edu.cn](mailto:yfzhou@sjtu.edu.cn) (Y. Zhou)

## Contents

- 1. Molecular structures of organic foulants used in the Research**
- 2. Force field parameter files (TMC.itp, MPD.itp, TMC-MPD.itp, TMCOOH.itp, tip3P.itp, PEG.itp, n-decane.itp, MEBE.itp)**

## 1. Molecular structures of organic foulants used in the Research

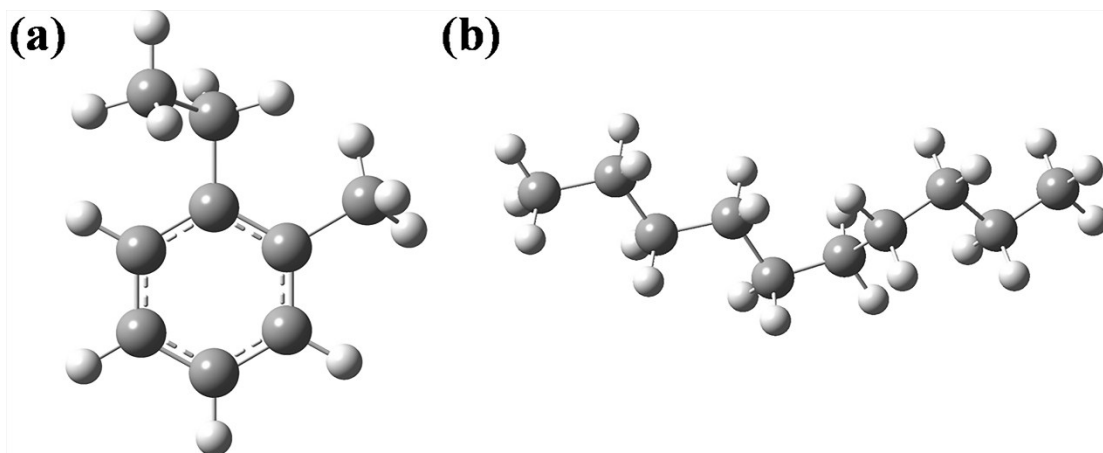

**Fig. S1** The molecular structures of (a) 1-ethyl-2-methyl benzene and (b) n-decane, where gray represents carbon atom and white represents hydrogen atom.

## 2. Force field parameter files

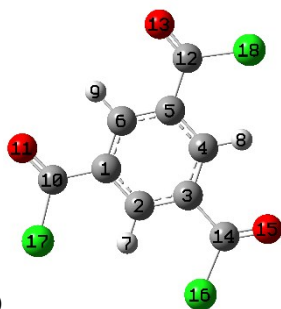

### TMC.itp

[ atomtypes ]

| ;name | bond_type | mass   | charge | ptype | sigma       | epsilon     |
|-------|-----------|--------|--------|-------|-------------|-------------|
| c     | c         | 0.0000 | 0.0000 | A     | 3.39967e-01 | 3.59824e-01 |
| cl    | cl        | 0.0000 | 0.0000 | A     | 3.47094e-01 | 1.10876e+00 |
| ha    | ha        | 0.0000 | 0.0000 | A     | 2.59964e-01 | 6.27600e-02 |
| ca    | ca        | 0.0000 | 0.0000 | A     | 3.39967e-01 | 3.59824e-01 |
| o     | o         | 0.0000 | 0.0000 | A     | 2.95992e-01 | 8.78640e-01 |

[ moleculetype ]

| ; monomer_name | nrexcl |
|----------------|--------|
| TMC            | 3      |

[ atoms ]

| ; atom_number | type | resnr | residue | atom | cgnr | charge  | mass      |
|---------------|------|-------|---------|------|------|---------|-----------|
| 1             | ca   | 1     | TMC     | C    | 1    | 0.0272  | 12.000000 |
| 2             | ca   | 1     | TMC     | C1   | 2    | -0.1339 | 12.000000 |
| 3             | ca   | 1     | TMC     | C2   | 3    | 0.0272  | 12.000000 |
| 4             | ca   | 1     | TMC     | C3   | 4    | -0.1339 | 12.000000 |
| 5             | ca   | 1     | TMC     | C4   | 5    | 0.0272  | 12.000000 |
| 6             | ca   | 1     | TMC     | C5   | 6    | -0.1339 | 12.000000 |
| 7             | ha   | 1     | TMC     | H    | 7    | 0.1653  | 1.000000  |
| 8             | ha   | 1     | TMC     | H1   | 8    | 0.1653  | 1.000000  |
| 9             | ha   | 1     | TMC     | H2   | 9    | 0.1653  | 1.000000  |
| 10            | c    | 1     | TMC     | C6   | 10   | 0.4744  | 12.000000 |
| 11            | o    | 1     | TMC     | O    | 11   | -0.4030 | 16.000000 |
| 12            | c    | 1     | TMC     | C7   | 12   | 0.4744  | 12.000000 |
| 13            | o    | 1     | TMC     | O1   | 13   | -0.4030 | 16.000000 |
| 14            | c    | 1     | TMC     | C8   | 14   | 0.4744  | 12.000000 |
| 15            | o    | 1     | TMC     | O2   | 15   | -0.4030 | 16.000000 |
| 16            | cl   | 1     | TMC     | Cl   | 16   | -0.13   | 35.500000 |
| 17            | cl   | 1     | TMC     | Cl1  | 17   | -0.13   | 35.500000 |
| 18            | cl   | 1     | TMC     | Cl2  | 18   | -0.13   | 35.500000 |

[ bonds ]

| ; | at.i | at.j | funct | b0(nm)     | kb(kJ mol <sup>-1</sup> nm <sup>-2</sup> ) | at.i:atom_num_i |
|---|------|------|-------|------------|--------------------------------------------|-----------------|
|   | 2    | 7    | 1     | 1.0870e-01 | 2.8811e+05                                 |                 |
|   | 4    | 8    | 1     | 1.0870e-01 | 2.8811e+05                                 |                 |
|   | 6    | 9    | 1     | 1.0870e-01 | 2.8811e+05                                 |                 |
|   | 1    | 2    | 1     | 1.3870e-01 | 4.0033e+05                                 |                 |
|   | 1    | 6    | 1     | 1.3870e-01 | 4.0033e+05                                 |                 |
|   | 1    | 10   | 1     | 1.4870e-01 | 2.9263e+05                                 |                 |
|   | 2    | 3    | 1     | 1.3870e-01 | 4.0033e+05                                 |                 |
|   | 3    | 4    | 1     | 1.3870e-01 | 4.0033e+05                                 |                 |
|   | 3    | 14   | 1     | 1.4870e-01 | 2.9263e+05                                 |                 |
|   | 4    | 5    | 1     | 1.3870e-01 | 4.0033e+05                                 |                 |
|   | 5    | 6    | 1     | 1.3870e-01 | 4.0033e+05                                 |                 |
|   | 5    | 12   | 1     | 1.4870e-01 | 2.9263e+05                                 |                 |
|   | 10   | 11   | 1     | 1.2140e-01 | 5.4225e+05                                 |                 |
|   | 10   | 17   | 1     | 1.7660e-01 | 2.4560e+05                                 |                 |
|   | 12   | 13   | 1     | 1.2140e-01 | 5.4225e+05                                 |                 |
|   | 12   | 18   | 1     | 1.7660e-01 | 2.4560e+05                                 |                 |
|   | 14   | 15   | 1     | 1.2140e-01 | 5.4225e+05                                 |                 |
|   | 14   | 16   | 1     | 1.7660e-01 | 2.4560e+05                                 |                 |

[ pairs ]

| ; | at.i | at.j | funct |
|---|------|------|-------|
|   | 2    | 9    | 1     |
|   | 2    | 8    | 1     |
|   | 4    | 7    | 1     |
|   | 4    | 9    | 1     |
|   | 6    | 7    | 1     |
|   | 6    | 8    | 1     |
|   | 10   | 7    | 1     |
|   | 7    | 14   | 1     |
|   | 8    | 14   | 1     |
|   | 8    | 12   | 1     |
|   | 10   | 9    | 1     |
|   | 9    | 12   | 1     |
|   | 1    | 4    | 1     |
|   | 1    | 14   | 1     |
|   | 1    | 12   | 1     |
|   | 2    | 5    | 1     |
|   | 2    | 11   | 1     |
|   | 2    | 17   | 1     |
|   | 2    | 15   | 1     |
|   | 2    | 16   | 1     |
|   | 6    | 3    | 1     |
|   | 10   | 3    | 1     |

|    |    |   |
|----|----|---|
| 3  | 12 | 1 |
| 4  | 15 | 1 |
| 4  | 16 | 1 |
| 4  | 13 | 1 |
| 4  | 18 | 1 |
| 5  | 14 | 1 |
| 10 | 5  | 1 |
| 6  | 11 | 1 |
| 6  | 17 | 1 |
| 6  | 13 | 1 |
| 6  | 18 | 1 |

[ angles ]

| ; at.i | at.j | at.k | funct | theta(deg) | cth(kJ mol <sup>-1</sup> rad <sup>-2</sup> ) |
|--------|------|------|-------|------------|----------------------------------------------|
| 1      | 2    | 7    | 1     | 1.2001e+02 | 4.0551e+02                                   |
| 1      | 6    | 9    | 1     | 1.2001e+02 | 4.0551e+02                                   |
| 3      | 2    | 7    | 1     | 1.2001e+02 | 4.0551e+02                                   |
| 3      | 4    | 8    | 1     | 1.2001e+02 | 4.0551e+02                                   |
| 5      | 4    | 8    | 1     | 1.2001e+02 | 4.0551e+02                                   |
| 5      | 6    | 9    | 1     | 1.2001e+02 | 4.0551e+02                                   |
| 1      | 2    | 3    | 1     | 1.1997e+02 | 5.6216e+02                                   |
| 1      | 6    | 5    | 1     | 1.1997e+02 | 5.6216e+02                                   |
| 1      | 10   | 11   | 1     | 1.2344e+02 | 5.7463e+02                                   |
| 1      | 10   | 17   | 1     | 1.1494e+02 | 5.1891e+02                                   |
| 2      | 1    | 6    | 1     | 1.1997e+02 | 5.6216e+02                                   |
| 2      | 1    | 10   | 1     | 1.2014e+02 | 5.4091e+02                                   |
| 2      | 3    | 4    | 1     | 1.1997e+02 | 5.6216e+02                                   |
| 2      | 3    | 14   | 1     | 1.2014e+02 | 5.4091e+02                                   |
| 3      | 4    | 5    | 1     | 1.1997e+02 | 5.6216e+02                                   |
| 3      | 14   | 15   | 1     | 1.2344e+02 | 5.7463e+02                                   |
| 3      | 14   | 16   | 1     | 1.1494e+02 | 5.1891e+02                                   |
| 4      | 3    | 14   | 1     | 1.2014e+02 | 5.4091e+02                                   |
| 4      | 5    | 6    | 1     | 1.1997e+02 | 5.6216e+02                                   |
| 4      | 5    | 12   | 1     | 1.2014e+02 | 5.4091e+02                                   |
| 5      | 12   | 13   | 1     | 1.2344e+02 | 5.7463e+02                                   |
| 5      | 12   | 18   | 1     | 1.1494e+02 | 5.1891e+02                                   |
| 6      | 1    | 10   | 1     | 1.2014e+02 | 5.4091e+02                                   |
| 6      | 5    | 12   | 1     | 1.2014e+02 | 5.4091e+02                                   |
| 11     | 10   | 17   | 1     | 1.2151e+02 | 5.3790e+02                                   |
| 13     | 12   | 18   | 1     | 1.2151e+02 | 5.3790e+02                                   |
| 15     | 14   | 16   | 1     | 1.2151e+02 | 5.3790e+02                                   |

[ dihedrals ]

| ; at.i | at.j | at.k | at.l | funct | C0(kJ mol <sup>-1</sup> ) | C1(kJ mol <sup>-1</sup> ) | C2(kJ mol <sup>-1</sup> ) | C3(kJ mol <sup>-1</sup> ) | C4(kJ mol <sup>-1</sup> ) | C5(kJ mol <sup>-1</sup> ) |
|--------|------|------|------|-------|---------------------------|---------------------------|---------------------------|---------------------------|---------------------------|---------------------------|
|--------|------|------|------|-------|---------------------------|---------------------------|---------------------------|---------------------------|---------------------------|---------------------------|

|    |   |    |    |   |          |         |           |         |         |         |   |
|----|---|----|----|---|----------|---------|-----------|---------|---------|---------|---|
| 2  | 1 | 6  | 9  | 3 | 30.33400 | 0.00000 | -30.33400 | 0.00000 | 0.00000 | 0.00000 | ; |
| 2  | 3 | 4  | 8  | 3 | 30.33400 | 0.00000 | -30.33400 | 0.00000 | 0.00000 | 0.00000 | ; |
| 4  | 3 | 2  | 7  | 3 | 30.33400 | 0.00000 | -30.33400 | 0.00000 | 0.00000 | 0.00000 | ; |
| 4  | 5 | 6  | 9  | 3 | 30.33400 | 0.00000 | -30.33400 | 0.00000 | 0.00000 | 0.00000 | ; |
| 6  | 1 | 2  | 7  | 3 | 30.33400 | 0.00000 | -30.33400 | 0.00000 | 0.00000 | 0.00000 | ; |
| 6  | 5 | 4  | 8  | 3 | 30.33400 | 0.00000 | -30.33400 | 0.00000 | 0.00000 | 0.00000 | ; |
| 10 | 1 | 2  | 7  | 3 | 30.33400 | 0.00000 | -30.33400 | 0.00000 | 0.00000 | 0.00000 | ; |
| 7  | 2 | 3  | 14 | 3 | 30.33400 | 0.00000 | -30.33400 | 0.00000 | 0.00000 | 0.00000 | ; |
| 8  | 4 | 3  | 14 | 3 | 30.33400 | 0.00000 | -30.33400 | 0.00000 | 0.00000 | 0.00000 | ; |
| 8  | 4 | 5  | 12 | 3 | 30.33400 | 0.00000 | -30.33400 | 0.00000 | 0.00000 | 0.00000 | ; |
| 10 | 1 | 6  | 9  | 3 | 30.33400 | 0.00000 | -30.33400 | 0.00000 | 0.00000 | 0.00000 | ; |
| 9  | 6 | 5  | 12 | 3 | 30.33400 | 0.00000 | -30.33400 | 0.00000 | 0.00000 | 0.00000 | ; |
| 1  | 2 | 3  | 4  | 3 | 30.33400 | 0.00000 | -30.33400 | 0.00000 | 0.00000 | 0.00000 | ; |
| 1  | 2 | 3  | 14 | 3 | 30.33400 | 0.00000 | -30.33400 | 0.00000 | 0.00000 | 0.00000 | ; |
| 1  | 6 | 5  | 4  | 3 | 30.33400 | 0.00000 | -30.33400 | 0.00000 | 0.00000 | 0.00000 | ; |
| 1  | 6 | 5  | 12 | 3 | 30.33400 | 0.00000 | -30.33400 | 0.00000 | 0.00000 | 0.00000 | ; |
| 2  | 1 | 6  | 5  | 3 | 30.33400 | 0.00000 | -30.33400 | 0.00000 | 0.00000 | 0.00000 | ; |
| 2  | 1 | 10 | 11 | 3 | 30.33400 | 0.00000 | -30.33400 | 0.00000 | 0.00000 | 0.00000 | ; |
| 2  | 1 | 10 | 17 | 3 | 30.33400 | 0.00000 | -30.33400 | 0.00000 | 0.00000 | 0.00000 | ; |
| 2  | 3 | 4  | 5  | 3 | 30.33400 | 0.00000 | -30.33400 | 0.00000 | 0.00000 | 0.00000 | ; |
| 2  | 3 | 14 | 15 | 3 | 30.33400 | 0.00000 | -30.33400 | 0.00000 | 0.00000 | 0.00000 | ; |
| 2  | 3 | 14 | 16 | 3 | 30.33400 | 0.00000 | -30.33400 | 0.00000 | 0.00000 | 0.00000 | ; |
| 6  | 1 | 2  | 3  | 3 | 30.33400 | 0.00000 | -30.33400 | 0.00000 | 0.00000 | 0.00000 | ; |
| 10 | 1 | 2  | 3  | 3 | 30.33400 | 0.00000 | -30.33400 | 0.00000 | 0.00000 | 0.00000 | ; |
| 3  | 4 | 5  | 6  | 3 | 30.33400 | 0.00000 | -30.33400 | 0.00000 | 0.00000 | 0.00000 | ; |
| 3  | 4 | 5  | 12 | 3 | 30.33400 | 0.00000 | -30.33400 | 0.00000 | 0.00000 | 0.00000 | ; |
| 4  | 3 | 14 | 15 | 3 | 30.33400 | 0.00000 | -30.33400 | 0.00000 | 0.00000 | 0.00000 | ; |
| 4  | 3 | 14 | 16 | 3 | 30.33400 | 0.00000 | -30.33400 | 0.00000 | 0.00000 | 0.00000 | ; |
| 4  | 5 | 12 | 13 | 3 | 30.33400 | 0.00000 | -30.33400 | 0.00000 | 0.00000 | 0.00000 | ; |
| 4  | 5 | 12 | 18 | 3 | 30.33400 | 0.00000 | -30.33400 | 0.00000 | 0.00000 | 0.00000 | ; |
| 5  | 4 | 3  | 14 | 3 | 30.33400 | 0.00000 | -30.33400 | 0.00000 | 0.00000 | 0.00000 | ; |
| 10 | 1 | 6  | 5  | 3 | 30.33400 | 0.00000 | -30.33400 | 0.00000 | 0.00000 | 0.00000 | ; |
| 6  | 1 | 10 | 11 | 3 | 30.33400 | 0.00000 | -30.33400 | 0.00000 | 0.00000 | 0.00000 | ; |
| 6  | 1 | 10 | 17 | 3 | 30.33400 | 0.00000 | -30.33400 | 0.00000 | 0.00000 | 0.00000 | ; |
| 6  | 5 | 12 | 13 | 3 | 30.33400 | 0.00000 | -30.33400 | 0.00000 | 0.00000 | 0.00000 | ; |
| 6  | 5 | 12 | 18 | 3 | 30.33400 | 0.00000 | -30.33400 | 0.00000 | 0.00000 | 0.00000 | ; |

[ dihedrals ]

| ; | at.i | at.j | at.k | at.l | funct | C0(kJ mol <sup>-1</sup> ) | C1(kJ mol <sup>-1</sup> ) | C2(kJ mol <sup>-1</sup> ) | C3(kJ mol <sup>-1</sup> ) | C4(kJ mol <sup>-1</sup> ) | C5(kJ mol <sup>-1</sup> ) |   |
|---|------|------|------|------|-------|---------------------------|---------------------------|---------------------------|---------------------------|---------------------------|---------------------------|---|
|   | 2    | 1    | 3    | 7    | 3     | 9.20480                   | 0.00000                   | -9.20480                  | 0.00000                   | 0.00000                   | 0.00000                   | ; |
|   | 4    | 3    | 5    | 8    | 3     | 9.20480                   | 0.00000                   | -9.20480                  | 0.00000                   | 0.00000                   | 0.00000                   | ; |
|   | 6    | 1    | 5    | 9    | 3     | 9.20480                   | 0.00000                   | -9.20480                  | 0.00000                   | 0.00000                   | 0.00000                   | ; |
|   | 1    | 2    | 6    | 10   | 3     | 9.20480                   | 0.00000                   | -9.20480                  | 0.00000                   | 0.00000                   | 0.00000                   | ; |
|   | 3    | 2    | 4    | 14   | 3     | 9.20480                   | 0.00000                   | -9.20480                  | 0.00000                   | 0.00000                   | 0.00000                   | ; |

|    |   |    |    |   |          |         |           |         |         |         |   |
|----|---|----|----|---|----------|---------|-----------|---------|---------|---------|---|
| 5  | 4 | 6  | 12 | 3 | 9.20480  | 0.00000 | -9.20480  | 0.00000 | 0.00000 | 0.00000 | ; |
| 10 | 1 | 17 | 11 | 3 | 87.86400 | 0.00000 | -87.86400 | 0.00000 | 0.00000 | 0.00000 | ; |
| 12 | 5 | 13 | 18 | 3 | 87.86400 | 0.00000 | -87.86400 | 0.00000 | 0.00000 | 0.00000 | ; |
| 14 | 3 | 15 | 16 | 3 | 87.86400 | 0.00000 | -87.86400 | 0.00000 | 0.00000 | 0.00000 | ; |

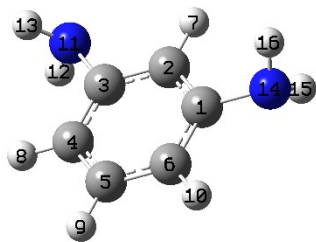

## MPD.itp

[ atomtypes ]

| ;name | bond_type | mass   | charge | ptype | sigma       | epsilon     |
|-------|-----------|--------|--------|-------|-------------|-------------|
| ha    | ha        | 0.0000 | 0.0000 | A     | 2.59964e-01 | 6.27600e-02 |
| hn    | hn        | 0.0000 | 0.0000 | A     | 1.06908e-01 | 6.56888e-02 |
| ca    | ca        | 0.0000 | 0.0000 | A     | 3.39967e-01 | 3.59824e-01 |
| nh    | nh        | 0.0000 | 0.0000 | A     | 3.25000e-01 | 7.11280e-01 |

[ moleculetype ]

| ; monomer_name | nrexcl |
|----------------|--------|
| mpd            | 3      |

[ atoms ]

| ; atom_number | type | resnr | residue | atom | cgnr | charge  | mass      |
|---------------|------|-------|---------|------|------|---------|-----------|
| 1             | ca   | 1     | mpd     | C    | 1    | 0.1078  | 12.000000 |
| 2             | ca   | 1     | mpd     | C1   | 2    | -0.0818 | 12.000000 |
| 3             | ca   | 1     | mpd     | C2   | 3    | 0.1078  | 12.000000 |
| 4             | ca   | 1     | mpd     | C3   | 4    | -0.0785 | 12.000000 |
| 5             | ca   | 1     | mpd     | C4   | 5    | -0.3361 | 12.000000 |
| 6             | ca   | 1     | mpd     | C5   | 6    | -0.0785 | 12.000000 |
| 7             | ha   | 1     | mpd     | H    | 7    | 0.1305  | 1.000000  |
| 8             | ha   | 1     | mpd     | H1   | 8    | 0.1280  | 1.000000  |
| 9             | ha   | 1     | mpd     | H2   | 9    | 0.1884  | 1.000000  |
| 10            | ha   | 1     | mpd     | H3   | 10   | 0.1280  | 1.000000  |
| 11            | nh   | 1     | mpd     | N    | 11   | -0.8842 | 14.000000 |
| 12            | hn   | 1     | mpd     | H4   | 12   | 0.3882  | 1.000000  |
| 13            | hn   | 1     | mpd     | H5   | 13   | 0.3882  | 1.000000  |
| 14            | nh   | 1     | mpd     | N1   | 14   | -0.8842 | 14.000000 |
| 15            | hn   | 1     | mpd     | H6   | 15   | 0.3882  | 1.000000  |
| 16            | hn   | 1     | mpd     | H7   | 16   | 0.3882  | 1.000000  |

[ bonds ]

| ; at.i | at.j | funct | b0(nm)     | kb(kJ mol <sup>-1</sup> nm <sup>-2</sup> ) | at.i:atom_num_i |
|--------|------|-------|------------|--------------------------------------------|-----------------|
| 2      | 7    | 1     | 1.0870e-01 | 2.8811e+05                                 |                 |
| 4      | 8    | 1     | 1.0870e-01 | 2.8811e+05                                 |                 |
| 5      | 9    | 1     | 1.0870e-01 | 2.8811e+05                                 |                 |
| 6      | 10   | 1     | 1.0870e-01 | 2.8811e+05                                 |                 |
| 11     | 12   | 1     | 1.0140e-01 | 3.3572e+05                                 |                 |



|    |    |   |            |            |
|----|----|---|------------|------------|
| 11 | 13 | 1 | 1.0140e-01 | 3.3572e+05 |
| 14 | 15 | 1 | 1.0140e-01 | 3.3572e+05 |
| 14 | 16 | 1 | 1.0140e-01 | 3.3572e+05 |
| 1  | 2  | 1 | 1.3870e-01 | 4.0033e+05 |
| 1  | 6  | 1 | 1.3870e-01 | 4.0033e+05 |
| 1  | 14 | 1 | 1.3640e-01 | 3.7572e+05 |
| 2  | 3  | 1 | 1.3870e-01 | 4.0033e+05 |
| 3  | 4  | 1 | 1.3870e-01 | 4.0033e+05 |
| 3  | 11 | 1 | 1.3640e-01 | 3.7572e+05 |
| 4  | 5  | 1 | 1.3870e-01 | 4.0033e+05 |
| 5  | 6  | 1 | 1.3870e-01 | 4.0033e+05 |

[ pairs ]

| ; | at.i | at.j | funct |
|---|------|------|-------|
|   | 1    | 9    | 1     |
|   | 2    | 10   | 1     |
|   | 2    | 15   | 1     |
|   | 2    | 16   | 1     |
|   | 2    | 8    | 1     |
|   | 2    | 12   | 1     |
|   | 2    | 13   | 1     |
|   | 3    | 9    | 1     |
|   | 4    | 7    | 1     |
|   | 4    | 12   | 1     |
|   | 4    | 13   | 1     |
|   | 4    | 10   | 1     |
|   | 6    | 7    | 1     |
|   | 6    | 15   | 1     |
|   | 6    | 16   | 1     |
|   | 6    | 8    | 1     |
|   | 14   | 7    | 1     |
|   | 7    | 11   | 1     |
|   | 8    | 11   | 1     |
|   | 8    | 9    | 1     |
|   | 9    | 10   | 1     |
|   | 14   | 10   | 1     |
|   | 1    | 4    | 1     |
|   | 1    | 11   | 1     |
|   | 2    | 5    | 1     |
|   | 6    | 3    | 1     |
|   | 14   | 3    | 1     |
|   | 5    | 11   | 1     |
|   | 14   | 5    | 1     |

## [ angles ]

| ; at.i | at.j | at.k | funct | theta(deg) | cth(kJ mol <sup>-1</sup> rad <sup>-2</sup> ) |
|--------|------|------|-------|------------|----------------------------------------------|
| 1      | 2    | 7    | 1     | 1.2001e+02 | 4.0551e+02                                   |
| 1      | 6    | 10   | 1     | 1.2001e+02 | 4.0551e+02                                   |
| 1      | 14   | 15   | 1     | 1.1613e+02 | 4.1070e+02                                   |
| 1      | 14   | 16   | 1     | 1.1613e+02 | 4.1070e+02                                   |
| 3      | 2    | 7    | 1     | 1.2001e+02 | 4.0551e+02                                   |
| 3      | 4    | 8    | 1     | 1.2001e+02 | 4.0551e+02                                   |
| 3      | 11   | 12   | 1     | 1.1613e+02 | 4.1070e+02                                   |
| 3      | 11   | 13   | 1     | 1.1613e+02 | 4.1070e+02                                   |
| 4      | 5    | 9    | 1     | 1.2001e+02 | 4.0551e+02                                   |
| 5      | 4    | 8    | 1     | 1.2001e+02 | 4.0551e+02                                   |
| 5      | 6    | 10   | 1     | 1.2001e+02 | 4.0551e+02                                   |
| 6      | 5    | 9    | 1     | 1.2001e+02 | 4.0551e+02                                   |
| 12     | 11   | 13   | 1     | 1.1485e+02 | 3.3514e+02                                   |
| 15     | 14   | 16   | 1     | 1.1485e+02 | 3.3514e+02                                   |
| 1      | 2    | 3    | 1     | 1.1997e+02 | 5.6216e+02                                   |
| 1      | 6    | 5    | 1     | 1.1997e+02 | 5.6216e+02                                   |
| 2      | 1    | 6    | 1     | 1.1997e+02 | 5.6216e+02                                   |
| 2      | 1    | 14   | 1     | 1.2013e+02 | 5.8024e+02                                   |
| 2      | 3    | 4    | 1     | 1.1997e+02 | 5.6216e+02                                   |
| 2      | 3    | 11   | 1     | 1.2013e+02 | 5.8024e+02                                   |
| 3      | 4    | 5    | 1     | 1.1997e+02 | 5.6216e+02                                   |
| 4      | 3    | 11   | 1     | 1.2013e+02 | 5.8024e+02                                   |
| 4      | 5    | 6    | 1     | 1.1997e+02 | 5.6216e+02                                   |
| 6      | 1    | 14   | 1     | 1.2013e+02 | 5.8024e+02                                   |

## [ dihedrals ]

| ; at.i | at.j | at.k | at.l | funct | C0(kJ mol <sup>-1</sup> ) | C1(kJ mol <sup>-1</sup> ) | C2(kJ mol <sup>-1</sup> ) | C3(kJ mol <sup>-1</sup> ) | C4(kJ mol <sup>-1</sup> ) | C5(kJ mol <sup>-1</sup> ) |   |
|--------|------|------|------|-------|---------------------------|---------------------------|---------------------------|---------------------------|---------------------------|---------------------------|---|
| 1      | 6    | 5    | 9    | 3     | 30.33400                  | 0.00000                   | -30.33400                 | 0.00000                   | 0.00000                   | 0.00000                   | ; |
| 2      | 1    | 6    | 10   | 3     | 30.33400                  | 0.00000                   | -30.33400                 | 0.00000                   | 0.00000                   | 0.00000                   | ; |
| 2      | 1    | 14   | 15   | 3     | 8.78640                   | 0.00000                   | -8.78640                  | 0.00000                   | 0.00000                   | 0.00000                   | ; |
| 2      | 1    | 14   | 16   | 3     | 8.78640                   | 0.00000                   | -8.78640                  | 0.00000                   | 0.00000                   | 0.00000                   | ; |
| 2      | 3    | 4    | 8    | 3     | 30.33400                  | 0.00000                   | -30.33400                 | 0.00000                   | 0.00000                   | 0.00000                   | ; |
| 2      | 3    | 11   | 12   | 3     | 8.78640                   | 0.00000                   | -8.78640                  | 0.00000                   | 0.00000                   | 0.00000                   | ; |
| 2      | 3    | 11   | 13   | 3     | 8.78640                   | 0.00000                   | -8.78640                  | 0.00000                   | 0.00000                   | 0.00000                   | ; |
| 3      | 4    | 5    | 9    | 3     | 30.33400                  | 0.00000                   | -30.33400                 | 0.00000                   | 0.00000                   | 0.00000                   | ; |
| 4      | 3    | 2    | 7    | 3     | 30.33400                  | 0.00000                   | -30.33400                 | 0.00000                   | 0.00000                   | 0.00000                   | ; |
| 4      | 3    | 11   | 12   | 3     | 8.78640                   | 0.00000                   | -8.78640                  | 0.00000                   | 0.00000                   | 0.00000                   | ; |
| 4      | 3    | 11   | 13   | 3     | 8.78640                   | 0.00000                   | -8.78640                  | 0.00000                   | 0.00000                   | 0.00000                   | ; |
| 4      | 5    | 6    | 10   | 3     | 30.33400                  | 0.00000                   | -30.33400                 | 0.00000                   | 0.00000                   | 0.00000                   | ; |
| 6      | 1    | 2    | 7    | 3     | 30.33400                  | 0.00000                   | -30.33400                 | 0.00000                   | 0.00000                   | 0.00000                   | ; |
| 6      | 1    | 14   | 15   | 3     | 8.78640                   | 0.00000                   | -8.78640                  | 0.00000                   | 0.00000                   | 0.00000                   | ; |
| 6      | 1    | 14   | 16   | 3     | 8.78640                   | 0.00000                   | -8.78640                  | 0.00000                   | 0.00000                   | 0.00000                   | ; |

|    |   |   |    |   |          |         |           |         |         |         |   |
|----|---|---|----|---|----------|---------|-----------|---------|---------|---------|---|
| 6  | 5 | 4 | 8  | 3 | 30.33400 | 0.00000 | -30.33400 | 0.00000 | 0.00000 | 0.00000 | ; |
| 14 | 1 | 2 | 7  | 3 | 30.33400 | 0.00000 | -30.33400 | 0.00000 | 0.00000 | 0.00000 | ; |
| 7  | 2 | 3 | 11 | 3 | 30.33400 | 0.00000 | -30.33400 | 0.00000 | 0.00000 | 0.00000 | ; |
| 8  | 4 | 3 | 11 | 3 | 30.33400 | 0.00000 | -30.33400 | 0.00000 | 0.00000 | 0.00000 | ; |
| 8  | 4 | 5 | 9  | 3 | 30.33400 | 0.00000 | -30.33400 | 0.00000 | 0.00000 | 0.00000 | ; |
| 9  | 5 | 6 | 10 | 3 | 30.33400 | 0.00000 | -30.33400 | 0.00000 | 0.00000 | 0.00000 | ; |
| 14 | 1 | 6 | 10 | 3 | 30.33400 | 0.00000 | -30.33400 | 0.00000 | 0.00000 | 0.00000 | ; |
| 1  | 2 | 3 | 4  | 3 | 30.33400 | 0.00000 | -30.33400 | 0.00000 | 0.00000 | 0.00000 | ; |
| 1  | 2 | 3 | 11 | 3 | 30.33400 | 0.00000 | -30.33400 | 0.00000 | 0.00000 | 0.00000 | ; |
| 1  | 6 | 5 | 4  | 3 | 30.33400 | 0.00000 | -30.33400 | 0.00000 | 0.00000 | 0.00000 | ; |
| 2  | 1 | 6 | 5  | 3 | 30.33400 | 0.00000 | -30.33400 | 0.00000 | 0.00000 | 0.00000 | ; |
| 2  | 3 | 4 | 5  | 3 | 30.33400 | 0.00000 | -30.33400 | 0.00000 | 0.00000 | 0.00000 | ; |
| 6  | 1 | 2 | 3  | 3 | 30.33400 | 0.00000 | -30.33400 | 0.00000 | 0.00000 | 0.00000 | ; |
| 14 | 1 | 2 | 3  | 3 | 30.33400 | 0.00000 | -30.33400 | 0.00000 | 0.00000 | 0.00000 | ; |
| 3  | 4 | 5 | 6  | 3 | 30.33400 | 0.00000 | -30.33400 | 0.00000 | 0.00000 | 0.00000 | ; |
| 5  | 4 | 3 | 11 | 3 | 30.33400 | 0.00000 | -30.33400 | 0.00000 | 0.00000 | 0.00000 | ; |
| 14 | 1 | 6 | 5  | 3 | 30.33400 | 0.00000 | -30.33400 | 0.00000 | 0.00000 | 0.00000 | ; |

[ dihedrals ]

| ; | at.i | at.j | at.k | at.l | funct | C0(kJ mol <sup>-1</sup> ) | C1(kJ mol <sup>-1</sup> ) | C2(kJ mol <sup>-1</sup> ) | C3(kJ mol <sup>-1</sup> ) | C4(kJ mol <sup>-1</sup> ) | C5(kJ mol <sup>-1</sup> ) | ; |
|---|------|------|------|------|-------|---------------------------|---------------------------|---------------------------|---------------------------|---------------------------|---------------------------|---|
|   | 2    | 1    | 3    | 7    | 3     | 9.20480                   | 0.00000                   | -9.20480                  | 0.00000                   | 0.00000                   | 0.00000                   | ; |
|   | 4    | 3    | 5    | 8    | 3     | 9.20480                   | 0.00000                   | -9.20480                  | 0.00000                   | 0.00000                   | 0.00000                   | ; |
|   | 5    | 4    | 6    | 9    | 3     | 9.20480                   | 0.00000                   | -9.20480                  | 0.00000                   | 0.00000                   | 0.00000                   | ; |
|   | 6    | 1    | 5    | 10   | 3     | 9.20480                   | 0.00000                   | -9.20480                  | 0.00000                   | 0.00000                   | 0.00000                   | ; |
|   | 1    | 2    | 6    | 14   | 3     | 9.20480                   | 0.00000                   | -9.20480                  | 0.00000                   | 0.00000                   | 0.00000                   | ; |
|   | 3    | 2    | 4    | 11   | 3     | 9.20480                   | 0.00000                   | -9.20480                  | 0.00000                   | 0.00000                   | 0.00000                   | ; |
|   | 11   | 3    | 12   | 13   | 3     | 9.20480                   | 0.00000                   | -9.20480                  | 0.00000                   | 0.00000                   | 0.00000                   | ; |
|   | 14   | 1    | 15   | 16   | 3     | 9.20480                   | 0.00000                   | -9.20480                  | 0.00000                   | 0.00000                   | 0.00000                   | ; |

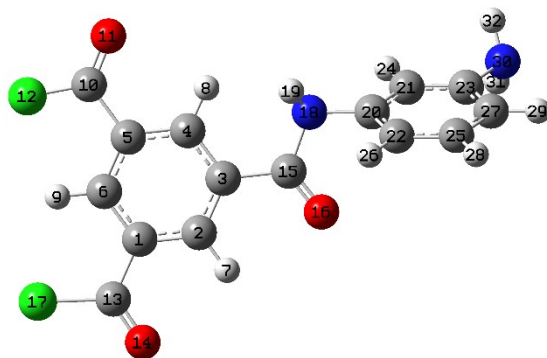

## TMC-MPD.itp

[ atomtypes ]

| ;name  | bond_type | mass   | charge | ptype | sigma       | epsilon     |
|--------|-----------|--------|--------|-------|-------------|-------------|
| n      | n         | 0.0000 | 0.0000 | A     | 3.25000e-01 | 7.11280e-01 |
| cl     | cl        | 0.0000 | 0.0000 | A     | 3.47094e-01 | 1.10876e+00 |
| ha     | ha        | 0.0000 | 0.0000 | A     | 2.59964e-01 | 6.27600e-02 |
| ca     | ca        | 0.0000 | 0.0000 | A     | 3.39967e-01 | 3.59824e-01 |
| hn     | hn        | 0.0000 | 0.0000 | A     | 1.06908e-01 | 6.56888e-02 |
| nh     | nh        | 0.0000 | 0.0000 | A     | 3.25000e-01 | 7.11280e-01 |
| c      | c         | 0.0000 | 0.0000 | A     | 3.39967e-01 | 3.59824e-01 |
| o      | o         | 0.0000 | 0.0000 | A     | 2.95992e-01 | 8.78640e-01 |
| cAmide | cAmide    | 0.0000 | 0.0000 | A     | 3.39967e-01 | 3.59824e-01 |
| n      | n         | 0.0000 | 0.0000 | A     | 3.25000e-01 | 7.11280e-01 |

[ moleculetype ]

```
; monomer_name  nrexcl
solute           3
```

[ atoms ]

| ;atom_number | type | resnr | residue | atom | cgnr | charge  | mass      |
|--------------|------|-------|---------|------|------|---------|-----------|
| 1            | ca   | 1     | mer     | C    | 1    | 0.0272  | 12.000000 |
| 2            | ca   | 1     | mer     | C1   | 2    | -0.1339 | 12.000000 |
| 3            | ca   | 1     | mer     | C2   | 3    | -0.2263 | 12.000000 |
| 4            | ca   | 1     | mer     | C3   | 4    | -0.0332 | 12.000000 |
| 5            | ca   | 1     | mer     | C4   | 5    | 0.0272  | 12.000000 |
| 6            | ca   | 1     | mer     | C5   | 6    | -0.1339 | 12.000000 |
| 7            | ha   | 1     | mer     | H    | 7    | 0.1653  | 1.000000  |
| 8            | ha   | 1     | mer     | H1   | 8    | 0.1619  | 1.000000  |
| 9            | ha   | 1     | mer     | H2   | 9    | 0.1653  | 1.000000  |
| 10           | c    | 1     | mer     | C6   | 10   | 0.4744  | 12.000000 |
| 11           | o    | 1     | mer     | O    | 11   | -0.4030 | 16.000000 |
| 12           | cl   | 1     | mer     | Cl   | 12   | -0.13   | 35.500000 |
| 13           | c    | 1     | mer     | C7   | 13   | 0.4744  | 12.000000 |
| 14           | o    | 1     | mer     | O1   | 14   | -0.4030 | 16.000000 |

|    |         |     |     |     |        |                   |
|----|---------|-----|-----|-----|--------|-------------------|
| 15 | cAmide1 | mer | C8  | 15  | 0.6638 | 12.000000         |
| 16 | o       | 1   | mer | O2  | 16     | -0.544 16.000000  |
| 17 | cl      | 1   | mer | Cl1 | 17     | -0.13 35.500000   |
| 18 | n       | 1   | mer | N   | 18     | -0.3872 14.000000 |
| 19 | hn      | 1   | mer | H3  | 19     | 0.2666 1.000000   |
| 20 | ca      | 1   | mer | C9  | 20     | 0.0984 12.000000  |
| 21 | ca      | 1   | mer | C10 | 21     | -0.0818 12.000000 |
| 22 | ca      | 1   | mer | C11 | 22     | -0.0785 12.000000 |
| 23 | ca      | 1   | mer | C12 | 23     | 0.1078 12.000000  |
| 24 | ha      | 1   | mer | H4  | 24     | 0.1305 1.000000   |
| 25 | ca      | 1   | mer | C13 | 25     | -0.3361 12.000000 |
| 26 | ha      | 1   | mer | H5  | 26     | 0.1280 1.000000   |
| 27 | ca      | 1   | mer | C14 | 27     | -0.0785 12.000000 |
| 28 | ha      | 1   | mer | H6  | 28     | 0.1884 1.000000   |
| 29 | ha      | 1   | mer | H7  | 29     | 0.1280 1.000000   |
| 30 | nh      | 1   | mer | N1  | 30     | -0.8842 14.000000 |
| 31 | hn      | 1   | mer | H8  | 31     | 0.3882 1.000000   |
| 32 | hn      | 1   | mer | H9  | 32     | 0.3882 1.000000   |

[ bonds ]

| ; | at.i | at.j | funct | b0(nm)     | kb(kJ mol <sup>-1</sup> nm <sup>-2</sup> ) | at.i:atom_num_i |
|---|------|------|-------|------------|--------------------------------------------|-----------------|
|   | 2    | 7    | 1     | 1.0870e-01 | 2.8811e+05                                 |                 |
|   | 4    | 8    | 1     | 1.0870e-01 | 2.8811e+05                                 |                 |
|   | 6    | 9    | 1     | 1.0870e-01 | 2.8811e+05                                 |                 |
|   | 18   | 19   | 1     | 1.0090e-01 | 3.4326e+05                                 |                 |
|   | 21   | 24   | 1     | 1.0870e-01 | 2.8811e+05                                 |                 |
|   | 22   | 26   | 1     | 1.0870e-01 | 2.8811e+05                                 |                 |
|   | 25   | 28   | 1     | 1.0870e-01 | 2.8811e+05                                 |                 |
|   | 27   | 29   | 1     | 1.0870e-01 | 2.8811e+05                                 |                 |
|   | 30   | 31   | 1     | 1.0140e-01 | 3.3572e+05                                 |                 |
|   | 30   | 32   | 1     | 1.0140e-01 | 3.3572e+05                                 |                 |
|   | 1    | 2    | 1     | 1.3870e-01 | 4.0033e+05                                 |                 |
|   | 1    | 6    | 1     | 1.3870e-01 | 4.0033e+05                                 |                 |
|   | 1    | 13   | 1     | 1.4870e-01 | 2.9263e+05                                 |                 |
|   | 2    | 3    | 1     | 1.3870e-01 | 4.0033e+05                                 |                 |
|   | 3    | 4    | 1     | 1.3870e-01 | 4.0033e+05                                 |                 |
|   | 3    | 15   | 1     | 1.4870e-01 | 2.9263e+05                                 |                 |
|   | 4    | 5    | 1     | 1.3870e-01 | 4.0033e+05                                 |                 |
|   | 5    | 6    | 1     | 1.3870e-01 | 4.0033e+05                                 |                 |
|   | 5    | 10   | 1     | 1.4870e-01 | 2.9263e+05                                 |                 |
|   | 10   | 11   | 1     | 1.2140e-01 | 5.4225e+05                                 |                 |
|   | 10   | 12   | 1     | 1.7660e-01 | 2.4560e+05                                 |                 |
|   | 13   | 14   | 1     | 1.2140e-01 | 5.4225e+05                                 |                 |
|   | 13   | 17   | 1     | 1.7660e-01 | 2.4560e+05                                 |                 |

|    |    |   |            |            |
|----|----|---|------------|------------|
| 15 | 16 | 1 | 1.2140e-01 | 5.4225e+05 |
| 15 | 18 | 1 | 1.3450e-01 | 4.0016e+05 |
| 18 | 20 | 1 | 1.4220e-01 | 3.1154e+05 |
| 20 | 21 | 1 | 1.3870e-01 | 4.0033e+05 |
| 20 | 22 | 1 | 1.3870e-01 | 4.0033e+05 |
| 21 | 23 | 1 | 1.3870e-01 | 4.0033e+05 |
| 22 | 25 | 1 | 1.3870e-01 | 4.0033e+05 |
| 23 | 27 | 1 | 1.3870e-01 | 4.0033e+05 |
| 23 | 30 | 1 | 1.3640e-01 | 3.7572e+05 |
| 25 | 27 | 1 | 1.3870e-01 | 4.0033e+05 |

[ pairs ]

| ; | at.i | at.j | funct |
|---|------|------|-------|
|   | 2    | 9    | 1     |
|   | 2    | 8    | 1     |
|   | 3    | 19   | 1     |
|   | 4    | 7    | 1     |
|   | 4    | 9    | 1     |
|   | 6    | 7    | 1     |
|   | 6    | 8    | 1     |
|   | 13   | 7    | 1     |
|   | 7    | 15   | 1     |
|   | 8    | 15   | 1     |
|   | 8    | 10   | 1     |
|   | 13   | 9    | 1     |
|   | 9    | 10   | 1     |
|   | 16   | 19   | 1     |
|   | 18   | 24   | 1     |
|   | 18   | 26   | 1     |
|   | 19   | 21   | 1     |
|   | 19   | 22   | 1     |
|   | 20   | 28   | 1     |
|   | 21   | 26   | 1     |
|   | 21   | 29   | 1     |
|   | 21   | 31   | 1     |
|   | 21   | 32   | 1     |
|   | 22   | 24   | 1     |
|   | 22   | 29   | 1     |
|   | 23   | 28   | 1     |
|   | 24   | 27   | 1     |
|   | 24   | 30   | 1     |
|   | 26   | 27   | 1     |
|   | 26   | 28   | 1     |
|   | 27   | 31   | 1     |

|    |    |   |
|----|----|---|
| 27 | 32 | 1 |
| 28 | 29 | 1 |
| 29 | 30 | 1 |
| 1  | 4  | 1 |
| 1  | 15 | 1 |
| 1  | 10 | 1 |
| 2  | 5  | 1 |
| 2  | 14 | 1 |
| 2  | 17 | 1 |
| 2  | 16 | 1 |
| 2  | 18 | 1 |
| 6  | 3  | 1 |
| 13 | 3  | 1 |
| 3  | 10 | 1 |
| 3  | 20 | 1 |
| 4  | 16 | 1 |
| 4  | 18 | 1 |
| 4  | 11 | 1 |
| 4  | 12 | 1 |
| 5  | 15 | 1 |
| 13 | 5  | 1 |
| 6  | 14 | 1 |
| 6  | 17 | 1 |
| 6  | 11 | 1 |
| 6  | 12 | 1 |
| 15 | 21 | 1 |
| 15 | 22 | 1 |
| 16 | 20 | 1 |
| 18 | 23 | 1 |
| 18 | 25 | 1 |
| 20 | 27 | 1 |
| 20 | 30 | 1 |
| 21 | 25 | 1 |
| 22 | 23 | 1 |
| 25 | 30 | 1 |

[ angles ]

| ; at.i | at.j | at.k | funct | theta(deg) | cth(kJ mol <sup>-1</sup> rad <sup>-2</sup> ) |
|--------|------|------|-------|------------|----------------------------------------------|
| 1      | 2    | 7    | 1     | 1.2001e+02 | 4.0551e+02                                   |
| 1      | 6    | 9    | 1     | 1.2001e+02 | 4.0551e+02                                   |
| 3      | 2    | 7    | 1     | 1.2001e+02 | 4.0551e+02                                   |
| 3      | 4    | 8    | 1     | 1.2001e+02 | 4.0551e+02                                   |
| 5      | 4    | 8    | 1     | 1.2001e+02 | 4.0551e+02                                   |
| 5      | 6    | 9    | 1     | 1.2001e+02 | 4.0551e+02                                   |

|    |    |    |   |            |            |
|----|----|----|---|------------|------------|
| 15 | 18 | 19 | 1 | 1.1846e+02 | 4.1179e+02 |
| 19 | 18 | 20 | 1 | 1.1594e+02 | 3.9631e+02 |
| 20 | 21 | 24 | 1 | 1.2001e+02 | 4.0551e+02 |
| 20 | 22 | 26 | 1 | 1.2001e+02 | 4.0551e+02 |
| 22 | 25 | 28 | 1 | 1.2001e+02 | 4.0551e+02 |
| 23 | 21 | 24 | 1 | 1.2001e+02 | 4.0551e+02 |
| 23 | 27 | 29 | 1 | 1.2001e+02 | 4.0551e+02 |
| 23 | 30 | 31 | 1 | 1.1613e+02 | 4.1070e+02 |
| 23 | 30 | 32 | 1 | 1.1613e+02 | 4.1070e+02 |
| 25 | 22 | 26 | 1 | 1.2001e+02 | 4.0551e+02 |
| 25 | 27 | 29 | 1 | 1.2001e+02 | 4.0551e+02 |
| 27 | 25 | 28 | 1 | 1.2001e+02 | 4.0551e+02 |
| 31 | 30 | 32 | 1 | 1.1485e+02 | 3.3514e+02 |
| 1  | 2  | 3  | 1 | 1.1997e+02 | 5.6216e+02 |
| 1  | 6  | 5  | 1 | 1.1997e+02 | 5.6216e+02 |
| 1  | 13 | 14 | 1 | 1.2344e+02 | 5.7463e+02 |
| 1  | 13 | 17 | 1 | 1.1494e+02 | 5.1891e+02 |
| 2  | 1  | 6  | 1 | 1.1997e+02 | 5.6216e+02 |
| 2  | 1  | 13 | 1 | 1.2014e+02 | 5.4091e+02 |
| 2  | 3  | 4  | 1 | 1.1997e+02 | 5.6216e+02 |
| 2  | 3  | 15 | 1 | 1.2014e+02 | 5.4091e+02 |
| 3  | 4  | 5  | 1 | 1.1997e+02 | 5.6216e+02 |
| 3  | 15 | 16 | 1 | 1.2344e+02 | 5.7463e+02 |
| 3  | 15 | 18 | 1 | 1.1514e+02 | 5.7296e+02 |
| 4  | 3  | 15 | 1 | 1.2014e+02 | 5.4091e+02 |
| 4  | 5  | 6  | 1 | 1.1997e+02 | 5.6216e+02 |
| 4  | 5  | 10 | 1 | 1.2014e+02 | 5.4091e+02 |
| 5  | 10 | 11 | 1 | 1.2344e+02 | 5.7463e+02 |
| 5  | 10 | 12 | 1 | 1.1494e+02 | 5.1891e+02 |
| 6  | 1  | 13 | 1 | 1.2014e+02 | 5.4091e+02 |
| 6  | 5  | 10 | 1 | 1.2014e+02 | 5.4091e+02 |
| 11 | 10 | 12 | 1 | 1.2151e+02 | 5.3790e+02 |
| 14 | 13 | 17 | 1 | 1.2151e+02 | 5.3790e+02 |
| 15 | 18 | 20 | 1 | 1.2371e+02 | 5.3798e+02 |
| 16 | 15 | 18 | 1 | 1.2203e+02 | 6.3455e+02 |
| 18 | 20 | 21 | 1 | 1.1989e+02 | 5.6877e+02 |
| 18 | 20 | 22 | 1 | 1.1989e+02 | 5.6877e+02 |
| 20 | 21 | 23 | 1 | 1.1997e+02 | 5.6216e+02 |
| 20 | 22 | 25 | 1 | 1.1997e+02 | 5.6216e+02 |
| 21 | 20 | 22 | 1 | 1.1997e+02 | 5.6216e+02 |
| 21 | 23 | 27 | 1 | 1.1997e+02 | 5.6216e+02 |
| 21 | 23 | 30 | 1 | 1.2013e+02 | 5.8024e+02 |
| 22 | 25 | 27 | 1 | 1.1997e+02 | 5.6216e+02 |
| 23 | 27 | 25 | 1 | 1.1997e+02 | 5.6216e+02 |



27 23 30 1 1.2013e+02 5.8024e+02

[ dihedrals ]

| ; at.i | at.j | at.k | at.l | funct | C0(kJ mol <sup>-1</sup> ) | C1(kJ mol <sup>-1</sup> ) | C2(kJ mol <sup>-1</sup> ) | C3(kJ mol <sup>-1</sup> ) | C4(kJ mol <sup>-1</sup> ) | C5(kJ mol <sup>-1</sup> ) |   |
|--------|------|------|------|-------|---------------------------|---------------------------|---------------------------|---------------------------|---------------------------|---------------------------|---|
| 2      | 1    | 6    | 9    | 3     | 30.33400                  | 0.00000                   | -30.33400                 | 0.00000                   | 0.00000                   | 0.00000                   | ; |
| 2      | 3    | 4    | 8    | 3     | 30.33400                  | 0.00000                   | -30.33400                 | 0.00000                   | 0.00000                   | 0.00000                   | ; |
| 3      | 15   | 18   | 19   | 3     | 20.92000                  | 0.00000                   | -20.92000                 | 0.00000                   | 0.00000                   | 0.00000                   | ; |
| 4      | 3    | 2    | 7    | 3     | 30.33400                  | 0.00000                   | -30.33400                 | 0.00000                   | 0.00000                   | 0.00000                   | ; |
| 4      | 5    | 6    | 9    | 3     | 30.33400                  | 0.00000                   | -30.33400                 | 0.00000                   | 0.00000                   | 0.00000                   | ; |
| 6      | 1    | 2    | 7    | 3     | 30.33400                  | 0.00000                   | -30.33400                 | 0.00000                   | 0.00000                   | 0.00000                   | ; |
| 6      | 5    | 4    | 8    | 3     | 30.33400                  | 0.00000                   | -30.33400                 | 0.00000                   | 0.00000                   | 0.00000                   | ; |
| 13     | 1    | 2    | 7    | 3     | 30.33400                  | 0.00000                   | -30.33400                 | 0.00000                   | 0.00000                   | 0.00000                   | ; |
| 7      | 2    | 3    | 15   | 3     | 30.33400                  | 0.00000                   | -30.33400                 | 0.00000                   | 0.00000                   | 0.00000                   | ; |
| 8      | 4    | 3    | 15   | 3     | 30.33400                  | 0.00000                   | -30.33400                 | 0.00000                   | 0.00000                   | 0.00000                   | ; |
| 8      | 4    | 5    | 10   | 3     | 30.33400                  | 0.00000                   | -30.33400                 | 0.00000                   | 0.00000                   | 0.00000                   | ; |
| 13     | 1    | 6    | 9    | 3     | 30.33400                  | 0.00000                   | -30.33400                 | 0.00000                   | 0.00000                   | 0.00000                   | ; |
| 9      | 6    | 5    | 10   | 3     | 30.33400                  | 0.00000                   | -30.33400                 | 0.00000                   | 0.00000                   | 0.00000                   | ; |
| 16     | 15   | 18   | 19   | 3     | 29.28800                  | -8.36800                  | -20.92000                 | 0.00000                   | 0.00000                   | 0.00000                   | ; |
| 18     | 20   | 21   | 24   | 3     | 30.33400                  | 0.00000                   | -30.33400                 | 0.00000                   | 0.00000                   | 0.00000                   | ; |
| 18     | 20   | 22   | 26   | 3     | 30.33400                  | 0.00000                   | -30.33400                 | 0.00000                   | 0.00000                   | 0.00000                   | ; |
| 19     | 18   | 20   | 21   | 3     | 3.76560                   | 0.00000                   | -3.76560                  | 0.00000                   | 0.00000                   | 0.00000                   | ; |
| 19     | 18   | 20   | 22   | 3     | 3.76560                   | 0.00000                   | -3.76560                  | 0.00000                   | 0.00000                   | 0.00000                   | ; |
| 20     | 22   | 25   | 28   | 3     | 30.33400                  | 0.00000                   | -30.33400                 | 0.00000                   | 0.00000                   | 0.00000                   | ; |
| 21     | 20   | 22   | 26   | 3     | 30.33400                  | 0.00000                   | -30.33400                 | 0.00000                   | 0.00000                   | 0.00000                   | ; |
| 21     | 23   | 27   | 29   | 3     | 30.33400                  | 0.00000                   | -30.33400                 | 0.00000                   | 0.00000                   | 0.00000                   | ; |
| 21     | 23   | 30   | 31   | 3     | 8.78640                   | 0.00000                   | -8.78640                  | 0.00000                   | 0.00000                   | 0.00000                   | ; |
| 21     | 23   | 30   | 32   | 3     | 8.78640                   | 0.00000                   | -8.78640                  | 0.00000                   | 0.00000                   | 0.00000                   | ; |
| 22     | 20   | 21   | 24   | 3     | 30.33400                  | 0.00000                   | -30.33400                 | 0.00000                   | 0.00000                   | 0.00000                   | ; |
| 22     | 25   | 27   | 29   | 3     | 30.33400                  | 0.00000                   | -30.33400                 | 0.00000                   | 0.00000                   | 0.00000                   | ; |
| 23     | 27   | 25   | 28   | 3     | 30.33400                  | 0.00000                   | -30.33400                 | 0.00000                   | 0.00000                   | 0.00000                   | ; |
| 24     | 21   | 23   | 27   | 3     | 30.33400                  | 0.00000                   | -30.33400                 | 0.00000                   | 0.00000                   | 0.00000                   | ; |
| 24     | 21   | 23   | 30   | 3     | 30.33400                  | 0.00000                   | -30.33400                 | 0.00000                   | 0.00000                   | 0.00000                   | ; |
| 26     | 22   | 25   | 27   | 3     | 30.33400                  | 0.00000                   | -30.33400                 | 0.00000                   | 0.00000                   | 0.00000                   | ; |
| 26     | 22   | 25   | 28   | 3     | 30.33400                  | 0.00000                   | -30.33400                 | 0.00000                   | 0.00000                   | 0.00000                   | ; |
| 27     | 23   | 30   | 31   | 3     | 8.78640                   | 0.00000                   | -8.78640                  | 0.00000                   | 0.00000                   | 0.00000                   | ; |
| 27     | 23   | 30   | 32   | 3     | 8.78640                   | 0.00000                   | -8.78640                  | 0.00000                   | 0.00000                   | 0.00000                   | ; |
| 28     | 25   | 27   | 29   | 3     | 30.33400                  | 0.00000                   | -30.33400                 | 0.00000                   | 0.00000                   | 0.00000                   | ; |
| 29     | 27   | 23   | 30   | 3     | 30.33400                  | 0.00000                   | -30.33400                 | 0.00000                   | 0.00000                   | 0.00000                   | ; |
| 1      | 3    | 2    | 7    | 3     | 9.20480                   | 0.00000                   | -9.20480                  | 0.00000                   | 0.00000                   | 0.00000                   | ; |
| 3      | 5    | 4    | 8    | 3     | 9.20480                   | 0.00000                   | -9.20480                  | 0.00000                   | 0.00000                   | 0.00000                   | ; |
| 1      | 5    | 6    | 9    | 3     | 9.20480                   | 0.00000                   | -9.20480                  | 0.00000                   | 0.00000                   | 0.00000                   | ; |
| 15     | 20   | 18   | 19   | 3     | 9.20480                   | 0.00000                   | -9.20480                  | 0.00000                   | 0.00000                   | 0.00000                   | ; |
| 20     | 23   | 21   | 24   | 3     | 9.20480                   | 0.00000                   | -9.20480                  | 0.00000                   | 0.00000                   | 0.00000                   | ; |
| 20     | 25   | 22   | 26   | 3     | 9.20480                   | 0.00000                   | -9.20480                  | 0.00000                   | 0.00000                   | 0.00000                   | ; |

|    |    |    |    |   |          |         |           |         |         |         |   |
|----|----|----|----|---|----------|---------|-----------|---------|---------|---------|---|
| 22 | 27 | 25 | 28 | 3 | 9.20480  | 0.00000 | -9.20480  | 0.00000 | 0.00000 | 0.00000 | ; |
| 23 | 25 | 27 | 29 | 3 | 9.20480  | 0.00000 | -9.20480  | 0.00000 | 0.00000 | 0.00000 | ; |
| 23 | 31 | 30 | 32 | 3 | 9.20480  | 0.00000 | -9.20480  | 0.00000 | 0.00000 | 0.00000 | ; |
| 1  | 2  | 3  | 4  | 3 | 30.33400 | 0.00000 | -30.33400 | 0.00000 | 0.00000 | 0.00000 | ; |
| 1  | 2  | 3  | 15 | 3 | 30.33400 | 0.00000 | -30.33400 | 0.00000 | 0.00000 | 0.00000 | ; |
| 1  | 6  | 5  | 4  | 3 | 30.33400 | 0.00000 | -30.33400 | 0.00000 | 0.00000 | 0.00000 | ; |
| 1  | 6  | 5  | 10 | 3 | 30.33400 | 0.00000 | -30.33400 | 0.00000 | 0.00000 | 0.00000 | ; |
| 2  | 1  | 6  | 5  | 3 | 30.33400 | 0.00000 | -30.33400 | 0.00000 | 0.00000 | 0.00000 | ; |
| 2  | 1  | 13 | 14 | 3 | 30.33400 | 0.00000 | -30.33400 | 0.00000 | 0.00000 | 0.00000 | ; |
| 2  | 1  | 13 | 17 | 3 | 30.33400 | 0.00000 | -30.33400 | 0.00000 | 0.00000 | 0.00000 | ; |
| 2  | 3  | 4  | 5  | 3 | 30.33400 | 0.00000 | -30.33400 | 0.00000 | 0.00000 | 0.00000 | ; |
| 2  | 3  | 15 | 16 | 3 | 30.33400 | 0.00000 | -30.33400 | 0.00000 | 0.00000 | 0.00000 | ; |
| 2  | 3  | 15 | 18 | 3 | 30.33400 | 0.00000 | -30.33400 | 0.00000 | 0.00000 | 0.00000 | ; |
| 6  | 1  | 2  | 3  | 3 | 30.33400 | 0.00000 | -30.33400 | 0.00000 | 0.00000 | 0.00000 | ; |
| 13 | 1  | 2  | 3  | 3 | 30.33400 | 0.00000 | -30.33400 | 0.00000 | 0.00000 | 0.00000 | ; |
| 3  | 4  | 5  | 6  | 3 | 30.33400 | 0.00000 | -30.33400 | 0.00000 | 0.00000 | 0.00000 | ; |
| 3  | 4  | 5  | 10 | 3 | 30.33400 | 0.00000 | -30.33400 | 0.00000 | 0.00000 | 0.00000 | ; |
| 3  | 15 | 18 | 20 | 3 | 20.92000 | 0.00000 | -20.92000 | 0.00000 | 0.00000 | 0.00000 | ; |
| 4  | 3  | 15 | 16 | 3 | 30.33400 | 0.00000 | -30.33400 | 0.00000 | 0.00000 | 0.00000 | ; |
| 4  | 3  | 15 | 18 | 3 | 30.33400 | 0.00000 | -30.33400 | 0.00000 | 0.00000 | 0.00000 | ; |
| 4  | 5  | 10 | 11 | 3 | 30.33400 | 0.00000 | -30.33400 | 0.00000 | 0.00000 | 0.00000 | ; |
| 4  | 5  | 10 | 12 | 3 | 30.33400 | 0.00000 | -30.33400 | 0.00000 | 0.00000 | 0.00000 | ; |
| 5  | 4  | 3  | 15 | 3 | 30.33400 | 0.00000 | -30.33400 | 0.00000 | 0.00000 | 0.00000 | ; |
| 13 | 1  | 6  | 5  | 3 | 30.33400 | 0.00000 | -30.33400 | 0.00000 | 0.00000 | 0.00000 | ; |
| 6  | 1  | 13 | 14 | 3 | 30.33400 | 0.00000 | -30.33400 | 0.00000 | 0.00000 | 0.00000 | ; |
| 6  | 1  | 13 | 17 | 3 | 30.33400 | 0.00000 | -30.33400 | 0.00000 | 0.00000 | 0.00000 | ; |
| 6  | 5  | 10 | 11 | 3 | 30.33400 | 0.00000 | -30.33400 | 0.00000 | 0.00000 | 0.00000 | ; |
| 6  | 5  | 10 | 12 | 3 | 30.33400 | 0.00000 | -30.33400 | 0.00000 | 0.00000 | 0.00000 | ; |
| 15 | 18 | 20 | 21 | 3 | 3.76560  | 0.00000 | -3.76560  | 0.00000 | 0.00000 | 0.00000 | ; |
| 15 | 18 | 20 | 22 | 3 | 3.76560  | 0.00000 | -3.76560  | 0.00000 | 0.00000 | 0.00000 | ; |
| 16 | 15 | 18 | 20 | 3 | 20.92000 | 0.00000 | -20.92000 | 0.00000 | 0.00000 | 0.00000 | ; |
| 18 | 20 | 21 | 23 | 3 | 30.33400 | 0.00000 | -30.33400 | 0.00000 | 0.00000 | 0.00000 | ; |
| 18 | 20 | 22 | 25 | 3 | 30.33400 | 0.00000 | -30.33400 | 0.00000 | 0.00000 | 0.00000 | ; |
| 20 | 21 | 23 | 27 | 3 | 30.33400 | 0.00000 | -30.33400 | 0.00000 | 0.00000 | 0.00000 | ; |
| 20 | 21 | 23 | 30 | 3 | 30.33400 | 0.00000 | -30.33400 | 0.00000 | 0.00000 | 0.00000 | ; |
| 20 | 22 | 25 | 27 | 3 | 30.33400 | 0.00000 | -30.33400 | 0.00000 | 0.00000 | 0.00000 | ; |
| 21 | 20 | 22 | 25 | 3 | 30.33400 | 0.00000 | -30.33400 | 0.00000 | 0.00000 | 0.00000 | ; |
| 21 | 23 | 27 | 25 | 3 | 30.33400 | 0.00000 | -30.33400 | 0.00000 | 0.00000 | 0.00000 | ; |
| 22 | 20 | 21 | 23 | 3 | 30.33400 | 0.00000 | -30.33400 | 0.00000 | 0.00000 | 0.00000 | ; |
| 22 | 25 | 27 | 23 | 3 | 30.33400 | 0.00000 | -30.33400 | 0.00000 | 0.00000 | 0.00000 | ; |
| 25 | 27 | 23 | 30 | 3 | 30.33400 | 0.00000 | -30.33400 | 0.00000 | 0.00000 | 0.00000 | ; |
| 6  | 1  | 2  | 13 | 3 | 9.20480  | 0.00000 | -9.20480  | 0.00000 | 0.00000 | 0.00000 | ; |
| 15 | 2  | 3  | 4  | 3 | 9.20480  | 0.00000 | -9.20480  | 0.00000 | 0.00000 | 0.00000 | ; |
| 10 | 4  | 5  | 6  | 3 | 9.20480  | 0.00000 | -9.20480  | 0.00000 | 0.00000 | 0.00000 | ; |

|    |    |    |    |   |          |         |           |         |         |         |   |
|----|----|----|----|---|----------|---------|-----------|---------|---------|---------|---|
| 5  | 12 | 10 | 11 | 3 | 87.86400 | 0.00000 | -87.86400 | 0.00000 | 0.00000 | 0.00000 | ; |
| 1  | 17 | 13 | 14 | 3 | 87.86400 | 0.00000 | -87.86400 | 0.00000 | 0.00000 | 0.00000 | ; |
| 3  | 18 | 15 | 16 | 3 | 87.86400 | 0.00000 | -87.86400 | 0.00000 | 0.00000 | 0.00000 | ; |
| 21 | 22 | 20 | 18 | 3 | 9.20480  | 0.00000 | -9.20480  | 0.00000 | 0.00000 | 0.00000 | ; |
| 21 | 27 | 23 | 30 | 3 | 9.20480  | 0.00000 | -9.20480  | 0.00000 | 0.00000 | 0.00000 | ; |

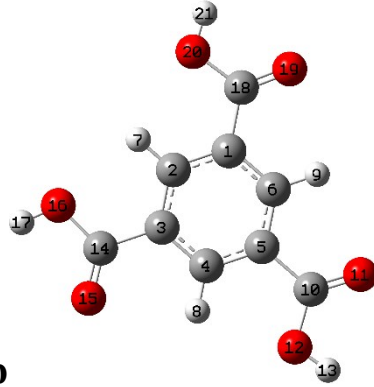

## TMCOOH.itp

[ atomtypes ]

| ;name | bond_type | mass   | charge | ptype | sigma       | epsilon     |
|-------|-----------|--------|--------|-------|-------------|-------------|
| oh    | oh        | 0.0000 | 0.0000 | A     | 3.06647e-01 | 8.80314e-01 |
| ha    | ha        | 0.0000 | 0.0000 | A     | 2.59964e-01 | 6.27600e-02 |
| ca    | ca        | 0.0000 | 0.0000 | A     | 3.39967e-01 | 3.59824e-01 |
| ho    | ho        | 0.0000 | 0.0000 | A     | 0.00000e+00 | 0.00000e+00 |
| o     | o         | 0.0000 | 0.0000 | A     | 2.95992e-01 | 8.78640e-01 |
| cCOOH | cCOOH     | 0.0000 | 0.0000 | A     | 3.39967e-01 | 3.59824e-01 |

[ moleculetype ]

```
; monomer_name  nrexcl
solute          3
```

[ atoms ]

| ;atom_number | type    | resnr | residue | atom | cgmr   | charge    | mass      |
|--------------|---------|-------|---------|------|--------|-----------|-----------|
| 1            | ca      | 1     | trc     | C    | 1      | -0.0545   | 12.000000 |
| 2            | ca      | 1     | trc     | C1   | 2      | -0.1121   | 12.000000 |
| 3            | ca      | 1     | trc     | C2   | 3      | -0.0545   | 12.000000 |
| 4            | ca      | 1     | trc     | C3   | 4      | -0.1121   | 12.000000 |
| 5            | ca      | 1     | trc     | C4   | 5      | -0.0545   | 12.000000 |
| 6            | ca      | 1     | trc     | C5   | 6      | -0.1121   | 12.000000 |
| 7            | ha      | 1     | trc     | H    | 7      | 0.18700   | 1.000000  |
| 8            | ha      | 1     | trc     | H1   | 8      | 0.18700   | 1.000000  |
| 9            | ha      | 1     | trc     | H2   | 9      | 0.18700   | 1.000000  |
| 10           | cCOOH1  | trc   | C6      | 10   | 0.7412 | 12.000000 |           |
| 11           | o       | 1     | trc     | O    | 11     | -0.5747   | 16.000000 |
| 12           | oh      | 1     | trc     | O1   | 12     | -0.6306   | 16.000000 |
| 13           | ho      | 1     | trc     | H3   | 13     | 0.4568    | 1.000000  |
| 14           | cCOOH 1 | trc   | C7      | 14   | 0.7412 | 12.000000 |           |
| 15           | o       | 1     | trc     | O2   | 15     | -0.5747   | 16.000000 |
| 16           | oh      | 1     | trc     | O3   | 16     | -0.6306   | 16.000000 |
| 17           | ho      | 1     | trc     | H4   | 17     | 0.4568    | 1.000000  |
| 18           | cCOOH   | 1     | trc     | C8   | 18     | 0.7412    | 12.000000 |
| 19           | o       | 1     | trc     | O4   | 19     | -0.5747   | 16.000000 |

|    |    |   |     |    |    |         |           |
|----|----|---|-----|----|----|---------|-----------|
| 20 | oh | 1 | trc | O5 | 20 | -0.6306 | 16.000000 |
| 21 | ho | 1 | trc | H5 | 21 | 0.4568  | 1.000000  |

[ bonds ]

| ; | at.i | at.j | funct | b0(nm)     | kb(kJ mol <sup>-1</sup> nm <sup>-2</sup> ) | at.i:atom_num_i |
|---|------|------|-------|------------|--------------------------------------------|-----------------|
|   | 2    | 7    | 1     | 1.0870e-01 | 2.8811e+05                                 |                 |
|   | 4    | 8    | 1     | 1.0870e-01 | 2.8811e+05                                 |                 |
|   | 6    | 9    | 1     | 1.0870e-01 | 2.8811e+05                                 |                 |
|   | 12   | 13   | 1     | 9.7400e-02 | 3.0928e+05                                 |                 |
|   | 16   | 17   | 1     | 9.7400e-02 | 3.0928e+05                                 |                 |
|   | 20   | 21   | 1     | 9.7400e-02 | 3.0928e+05                                 |                 |
|   | 1    | 2    | 1     | 1.3870e-01 | 4.0033e+05                                 |                 |
|   | 1    | 6    | 1     | 1.3870e-01 | 4.0033e+05                                 |                 |
|   | 1    | 18   | 1     | 1.4870e-01 | 2.9263e+05                                 |                 |
|   | 2    | 3    | 1     | 1.3870e-01 | 4.0033e+05                                 |                 |
|   | 3    | 4    | 1     | 1.3870e-01 | 4.0033e+05                                 |                 |
|   | 3    | 14   | 1     | 1.4870e-01 | 2.9263e+05                                 |                 |
|   | 4    | 5    | 1     | 1.3870e-01 | 4.0033e+05                                 |                 |
|   | 5    | 6    | 1     | 1.3870e-01 | 4.0033e+05                                 |                 |
|   | 5    | 10   | 1     | 1.4870e-01 | 2.9263e+05                                 |                 |
|   | 10   | 11   | 1     | 1.2140e-01 | 5.4225e+05                                 |                 |
|   | 10   | 12   | 1     | 1.3060e-01 | 3.9028e+05                                 |                 |
|   | 14   | 15   | 1     | 1.2140e-01 | 5.4225e+05                                 |                 |
|   | 14   | 16   | 1     | 1.3060e-01 | 3.9028e+05                                 |                 |
|   | 18   | 19   | 1     | 1.2140e-01 | 5.4225e+05                                 |                 |
|   | 18   | 20   | 1     | 1.3060e-01 | 3.9028e+05                                 |                 |

[ pairs ]

| ; | at.i | at.j | funct |
|---|------|------|-------|
|   | 1    | 21   | 1     |
|   | 2    | 9    | 1     |
|   | 2    | 8    | 1     |
|   | 3    | 17   | 1     |
|   | 4    | 7    | 1     |
|   | 4    | 9    | 1     |
|   | 5    | 13   | 1     |
|   | 6    | 7    | 1     |
|   | 6    | 8    | 1     |
|   | 18   | 7    | 1     |
|   | 7    | 14   | 1     |
|   | 8    | 14   | 1     |
|   | 8    | 10   | 1     |
|   | 18   | 9    | 1     |
|   | 9    | 10   | 1     |

|    |    |   |
|----|----|---|
| 11 | 13 | 1 |
| 15 | 17 | 1 |
| 19 | 21 | 1 |
| 1  | 4  | 1 |
| 1  | 14 | 1 |
| 1  | 10 | 1 |
| 2  | 5  | 1 |
| 2  | 19 | 1 |
| 2  | 20 | 1 |
| 2  | 15 | 1 |
| 2  | 16 | 1 |
| 6  | 3  | 1 |
| 18 | 3  | 1 |
| 3  | 10 | 1 |
| 4  | 15 | 1 |
| 4  | 16 | 1 |
| 4  | 11 | 1 |
| 4  | 12 | 1 |
| 5  | 14 | 1 |
| 18 | 5  | 1 |
| 6  | 19 | 1 |
| 6  | 20 | 1 |
| 6  | 11 | 1 |
| 6  | 12 | 1 |

[ angles ]

| ; at.i | at.j | at.k | funct | theta(deg) | cth(kJ mol <sup>-1</sup> rad <sup>-2</sup> ) |
|--------|------|------|-------|------------|----------------------------------------------|
| 1      | 2    | 7    | 1     | 1.2001e+02 | 4.0551e+02                                   |
| 1      | 6    | 9    | 1     | 1.2001e+02 | 4.0551e+02                                   |
| 3      | 2    | 7    | 1     | 1.2001e+02 | 4.0551e+02                                   |
| 3      | 4    | 8    | 1     | 1.2001e+02 | 4.0551e+02                                   |
| 5      | 4    | 8    | 1     | 1.2001e+02 | 4.0551e+02                                   |
| 5      | 6    | 9    | 1     | 1.2001e+02 | 4.0551e+02                                   |
| 10     | 12   | 13   | 1     | 1.0737e+02 | 4.2836e+02                                   |
| 14     | 16   | 17   | 1     | 1.0737e+02 | 4.2836e+02                                   |
| 18     | 20   | 21   | 1     | 1.0737e+02 | 4.2836e+02                                   |
| 1      | 2    | 3    | 1     | 1.1997e+02 | 5.6216e+02                                   |
| 1      | 6    | 5    | 1     | 1.1997e+02 | 5.6216e+02                                   |
| 1      | 18   | 19   | 1     | 1.2344e+02 | 5.7463e+02                                   |
| 1      | 18   | 20   | 1     | 1.1344e+02 | 5.8668e+02                                   |
| 2      | 1    | 6    | 1     | 1.1997e+02 | 5.6216e+02                                   |
| 2      | 1    | 18   | 1     | 1.2014e+02 | 5.4091e+02                                   |
| 2      | 3    | 4    | 1     | 1.1997e+02 | 5.6216e+02                                   |
| 2      | 3    | 14   | 1     | 1.2014e+02 | 5.4091e+02                                   |

|    |    |    |   |            |            |
|----|----|----|---|------------|------------|
| 3  | 4  | 5  | 1 | 1.1997e+02 | 5.6216e+02 |
| 3  | 14 | 15 | 1 | 1.2344e+02 | 5.7463e+02 |
| 3  | 14 | 16 | 1 | 1.1344e+02 | 5.8668e+02 |
| 4  | 3  | 14 | 1 | 1.2014e+02 | 5.4091e+02 |
| 4  | 5  | 6  | 1 | 1.1997e+02 | 5.6216e+02 |
| 4  | 5  | 10 | 1 | 1.2014e+02 | 5.4091e+02 |
| 5  | 10 | 11 | 1 | 1.2344e+02 | 5.7463e+02 |
| 5  | 10 | 12 | 1 | 1.1344e+02 | 5.8668e+02 |
| 6  | 1  | 18 | 1 | 1.2014e+02 | 5.4091e+02 |
| 6  | 5  | 10 | 1 | 1.2014e+02 | 5.4091e+02 |
| 11 | 10 | 12 | 1 | 1.2288e+02 | 6.4752e+02 |
| 15 | 14 | 16 | 1 | 1.2288e+02 | 6.4752e+02 |
| 19 | 18 | 20 | 1 | 1.2288e+02 | 6.4752e+02 |

[ dihedrals ]

| ; | at.i | at.j | at.k | at.l | funct | C0(kJ mol <sup>-1</sup> ) | C1(kJ mol <sup>-1</sup> ) | C2(kJ mol <sup>-1</sup> ) | C3(kJ mol <sup>-1</sup> ) | C4(kJ mol <sup>-1</sup> ) | C5(kJ mol <sup>-1</sup> ) | ; |
|---|------|------|------|------|-------|---------------------------|---------------------------|---------------------------|---------------------------|---------------------------|---------------------------|---|
|   | 1    | 18   | 20   | 21   | 3     | 19.24640                  | 0.00000                   | -19.24640                 | 0.00000                   | 0.00000                   | 0.00000                   | ; |
|   | 2    | 1    | 6    | 9    | 3     | 30.33400                  | 0.00000                   | -30.33400                 | 0.00000                   | 0.00000                   | 0.00000                   | ; |
|   | 2    | 3    | 4    | 8    | 3     | 30.33400                  | 0.00000                   | -30.33400                 | 0.00000                   | 0.00000                   | 0.00000                   | ; |
|   | 3    | 14   | 16   | 17   | 3     | 19.24640                  | 0.00000                   | -19.24640                 | 0.00000                   | 0.00000                   | 0.00000                   | ; |
|   | 4    | 3    | 2    | 7    | 3     | 30.33400                  | 0.00000                   | -30.33400                 | 0.00000                   | 0.00000                   | 0.00000                   | ; |
|   | 4    | 5    | 6    | 9    | 3     | 30.33400                  | 0.00000                   | -30.33400                 | 0.00000                   | 0.00000                   | 0.00000                   | ; |
|   | 5    | 10   | 12   | 13   | 3     | 19.24640                  | 0.00000                   | -19.24640                 | 0.00000                   | 0.00000                   | 0.00000                   | ; |
|   | 6    | 1    | 2    | 7    | 3     | 30.33400                  | 0.00000                   | -30.33400                 | 0.00000                   | 0.00000                   | 0.00000                   | ; |
|   | 6    | 5    | 4    | 8    | 3     | 30.33400                  | 0.00000                   | -30.33400                 | 0.00000                   | 0.00000                   | 0.00000                   | ; |
|   | 18   | 1    | 2    | 7    | 3     | 30.33400                  | 0.00000                   | -30.33400                 | 0.00000                   | 0.00000                   | 0.00000                   | ; |
|   | 7    | 2    | 3    | 14   | 3     | 30.33400                  | 0.00000                   | -30.33400                 | 0.00000                   | 0.00000                   | 0.00000                   | ; |
|   | 8    | 4    | 3    | 14   | 3     | 30.33400                  | 0.00000                   | -30.33400                 | 0.00000                   | 0.00000                   | 0.00000                   | ; |
|   | 8    | 4    | 5    | 10   | 3     | 30.33400                  | 0.00000                   | -30.33400                 | 0.00000                   | 0.00000                   | 0.00000                   | ; |
|   | 18   | 1    | 6    | 9    | 3     | 30.33400                  | 0.00000                   | -30.33400                 | 0.00000                   | 0.00000                   | 0.00000                   | ; |
|   | 9    | 6    | 5    | 10   | 3     | 30.33400                  | 0.00000                   | -30.33400                 | 0.00000                   | 0.00000                   | 0.00000                   | ; |
|   | 11   | 10   | 12   | 13   | 3     | 27.19600                  | -7.94960                  | -19.24640                 | 0.00000                   | 0.00000                   | 0.00000                   | ; |
|   | 15   | 14   | 16   | 17   | 3     | 27.19600                  | -7.94960                  | -19.24640                 | 0.00000                   | 0.00000                   | 0.00000                   | ; |
|   | 19   | 18   | 20   | 21   | 3     | 27.19600                  | -7.94960                  | -19.24640                 | 0.00000                   | 0.00000                   | 0.00000                   | ; |
|   | 1    | 3    | 2    | 7    | 3     | 9.20480                   | 0.00000                   | -9.20480                  | 0.00000                   | 0.00000                   | 0.00000                   | ; |
|   | 3    | 5    | 4    | 8    | 3     | 9.20480                   | 0.00000                   | -9.20480                  | 0.00000                   | 0.00000                   | 0.00000                   | ; |
|   | 1    | 5    | 6    | 9    | 3     | 9.20480                   | 0.00000                   | -9.20480                  | 0.00000                   | 0.00000                   | 0.00000                   | ; |
|   | 1    | 2    | 3    | 4    | 3     | 30.33400                  | 0.00000                   | -30.33400                 | 0.00000                   | 0.00000                   | 0.00000                   | ; |
|   | 1    | 2    | 3    | 14   | 3     | 30.33400                  | 0.00000                   | -30.33400                 | 0.00000                   | 0.00000                   | 0.00000                   | ; |
|   | 1    | 6    | 5    | 4    | 3     | 30.33400                  | 0.00000                   | -30.33400                 | 0.00000                   | 0.00000                   | 0.00000                   | ; |
|   | 1    | 6    | 5    | 10   | 3     | 30.33400                  | 0.00000                   | -30.33400                 | 0.00000                   | 0.00000                   | 0.00000                   | ; |
|   | 2    | 1    | 6    | 5    | 3     | 30.33400                  | 0.00000                   | -30.33400                 | 0.00000                   | 0.00000                   | 0.00000                   | ; |
|   | 2    | 1    | 18   | 19   | 3     | 30.33400                  | 0.00000                   | -30.33400                 | 0.00000                   | 0.00000                   | 0.00000                   | ; |
|   | 2    | 1    | 18   | 20   | 3     | 30.33400                  | 0.00000                   | -30.33400                 | 0.00000                   | 0.00000                   | 0.00000                   | ; |

|    |    |    |    |   |          |         |           |         |         |         |   |
|----|----|----|----|---|----------|---------|-----------|---------|---------|---------|---|
| 2  | 3  | 4  | 5  | 3 | 30.33400 | 0.00000 | -30.33400 | 0.00000 | 0.00000 | 0.00000 | ; |
| 2  | 3  | 14 | 15 | 3 | 30.33400 | 0.00000 | -30.33400 | 0.00000 | 0.00000 | 0.00000 | ; |
| 2  | 3  | 14 | 16 | 3 | 30.33400 | 0.00000 | -30.33400 | 0.00000 | 0.00000 | 0.00000 | ; |
| 6  | 1  | 2  | 3  | 3 | 30.33400 | 0.00000 | -30.33400 | 0.00000 | 0.00000 | 0.00000 | ; |
| 18 | 1  | 2  | 3  | 3 | 30.33400 | 0.00000 | -30.33400 | 0.00000 | 0.00000 | 0.00000 | ; |
| 3  | 4  | 5  | 6  | 3 | 30.33400 | 0.00000 | -30.33400 | 0.00000 | 0.00000 | 0.00000 | ; |
| 3  | 4  | 5  | 10 | 3 | 30.33400 | 0.00000 | -30.33400 | 0.00000 | 0.00000 | 0.00000 | ; |
| 4  | 3  | 14 | 15 | 3 | 30.33400 | 0.00000 | -30.33400 | 0.00000 | 0.00000 | 0.00000 | ; |
| 4  | 3  | 14 | 16 | 3 | 30.33400 | 0.00000 | -30.33400 | 0.00000 | 0.00000 | 0.00000 | ; |
| 4  | 5  | 10 | 11 | 3 | 30.33400 | 0.00000 | -30.33400 | 0.00000 | 0.00000 | 0.00000 | ; |
| 4  | 5  | 10 | 12 | 3 | 30.33400 | 0.00000 | -30.33400 | 0.00000 | 0.00000 | 0.00000 | ; |
| 5  | 4  | 3  | 14 | 3 | 30.33400 | 0.00000 | -30.33400 | 0.00000 | 0.00000 | 0.00000 | ; |
| 18 | 1  | 6  | 5  | 3 | 30.33400 | 0.00000 | -30.33400 | 0.00000 | 0.00000 | 0.00000 | ; |
| 6  | 1  | 18 | 19 | 3 | 30.33400 | 0.00000 | -30.33400 | 0.00000 | 0.00000 | 0.00000 | ; |
| 6  | 1  | 18 | 20 | 3 | 30.33400 | 0.00000 | -30.33400 | 0.00000 | 0.00000 | 0.00000 | ; |
| 6  | 5  | 10 | 11 | 3 | 30.33400 | 0.00000 | -30.33400 | 0.00000 | 0.00000 | 0.00000 | ; |
| 6  | 5  | 10 | 12 | 3 | 30.33400 | 0.00000 | -30.33400 | 0.00000 | 0.00000 | 0.00000 | ; |
| 6  | 1  | 2  | 18 | 3 | 9.20480  | 0.00000 | -9.20480  | 0.00000 | 0.00000 | 0.00000 | ; |
| 14 | 2  | 3  | 4  | 3 | 9.20480  | 0.00000 | -9.20480  | 0.00000 | 0.00000 | 0.00000 | ; |
| 10 | 4  | 5  | 6  | 3 | 9.20480  | 0.00000 | -9.20480  | 0.00000 | 0.00000 | 0.00000 | ; |
| 5  | 11 | 10 | 12 | 3 | 87.86400 | 0.00000 | -87.86400 | 0.00000 | 0.00000 | 0.00000 | ; |
| 3  | 15 | 14 | 16 | 3 | 87.86400 | 0.00000 | -87.86400 | 0.00000 | 0.00000 | 0.00000 | ; |
| 1  | 19 | 18 | 20 | 3 | 87.86400 | 0.00000 | -87.86400 | 0.00000 | 0.00000 | 0.00000 | ; |



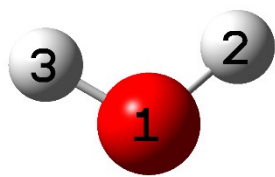

## Tip3P.itp

[ atomtypes ]

| ;name | bond_type | mass   | charge | ptype | sigma       | epsilon     |
|-------|-----------|--------|--------|-------|-------------|-------------|
| OW    | OW        | 0.0000 | 0.0000 | A     | 3.15061e-01 | 6.36386e-01 |
| HW    | HW        | 0.0000 | 0.0000 | A     | 0.00000e+00 | 0.00000e+00 |

[ moleculetype ]

| ; monomer_name | nrexcl |
|----------------|--------|
| SOL            | 2      |

[ atoms ]

| ; atom_number | type | resnr | residue | atom | cgnr | charge | mass     |
|---------------|------|-------|---------|------|------|--------|----------|
| 1             | OW   | 1     | SOL     | OW   | 1    | -0.834 | 16.00000 |
| 2             | HW   | 1     | SOL     | HW1  | 1    | 0.417  | 1.00800  |
| 3             | HW   | 1     | SOL     | HW2  | 1    | 0.417  | 1.00800  |

#ifndef FLEXIBLE

[ settles ]

| ; OW | funct | doh     | dhh     |
|------|-------|---------|---------|
| 1    | 1     | 0.09572 | 0.15139 |

[ exclusions ]

|   |   |   |
|---|---|---|
| 1 | 2 | 3 |
| 2 | 1 | 3 |
| 3 | 1 | 2 |

#else

[ bonds ]

| ;at.i | at.j | funct | b0(nm)  | kb(kJ mol <sup>-1</sup> nm <sup>-2</sup> ) | at.i:atom_num_i |
|-------|------|-------|---------|--------------------------------------------|-----------------|
| 1     | 2    | 1     | 0.09572 | 502416.0                                   |                 |
| 1     | 3    | 1     | 0.09572 | 502416.0                                   |                 |

[ angles ]

| ; at.i | at.j | at.k | funct | theta(deg) | cth(kJ mol <sup>-1</sup> rad <sup>-2</sup> ) |
|--------|------|------|-------|------------|----------------------------------------------|
| 2      | 1    | 3    | 1     | 104.52     | 628.02                                       |

#endif

# PEG.itp

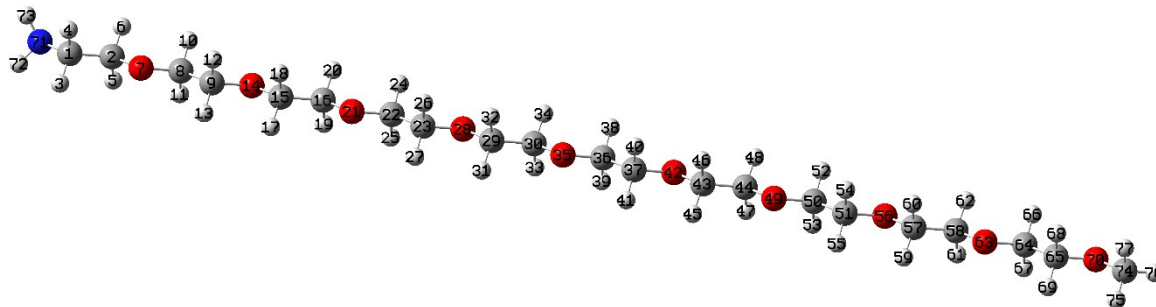

[ atomtypes ]

| ;name | bond_type | mass   | charge | ptype | sigma       | epsilon     |
|-------|-----------|--------|--------|-------|-------------|-------------|
| c3    | c3        | 0.0000 | 0.0000 | A     | 3.39967e-01 | 4.57730e-01 |
| h1    | h1        | 0.0000 | 0.0000 | A     | 2.47135e-01 | 6.56888e-02 |
| hn    | hn        | 0.0000 | 0.0000 | A     | 1.06908e-01 | 6.56888e-02 |
| n3    | n3        | 0.0000 | 0.0000 | A     | 3.25000e-01 | 7.11280e-01 |
| os    | os        | 0.0000 | 0.0000 | A     | 3.00001e-01 | 7.11280e-01 |

[ moleculetype ]

|                |        |
|----------------|--------|
| ; monomer_name | nrexcl |
| PEG            | 3      |

[ atoms ]

| ;atom_number | type | resnr | residue | atom | cgmr | charge   | mass      |
|--------------|------|-------|---------|------|------|----------|-----------|
| 1            | c3   | 1     | PEG     | C    | 1    | 0.31160  | 12.000000 |
| 2            | c3   | 1     | PEG     | C1   | 2    | 0.16230  | 12.000000 |
| 3            | h1   | 1     | PEG     | H    | 3    | -0.03150 | 1.000000  |
| 4            | h1   | 1     | PEG     | H1   | 4    | 0.04050  | 1.000000  |
| 5            | h1   | 1     | PEG     | H2   | 5    | 0.03990  | 1.000000  |
| 6            | h1   | 1     | PEG     | H3   | 6    | 0.03640  | 1.000000  |
| 7            | os   | 1     | PEG     | O    | 7    | -0.52310 | 16.000000 |
| 8            | c3   | 1     | PEG     | C2   | 8    | 0.23020  | 12.000000 |
| 9            | c3   | 1     | PEG     | C3   | 9    | 0.19350  | 12.000000 |
| 10           | h1   | 1     | PEG     | H4   | 10   | 0.01540  | 1.000000  |
| 11           | h1   | 1     | PEG     | H5   | 11   | 0.00760  | 1.000000  |
| 12           | h1   | 1     | PEG     | H6   | 12   | 0.02690  | 1.000000  |
| 13           | h1   | 1     | PEG     | H7   | 13   | 0.02690  | 1.000000  |
| 14           | os   | 1     | PEG     | O1   | 14   | -0.47420 | 16.000000 |
| 15           | c3   | 1     | PEG     | C4   | 15   | 0.14310  | 12.000000 |
| 16           | c3   | 1     | PEG     | C5   | 16   | 0.17330  | 12.000000 |
| 17           | h1   | 1     | PEG     | H8   | 17   | 0.03760  | 1.000000  |
| 18           | h1   | 1     | PEG     | H9   | 18   | 0.03760  | 1.000000  |

|    |    |   |     |     |    |          |           |
|----|----|---|-----|-----|----|----------|-----------|
| 19 | h1 | 1 | PEG | H10 | 19 | 0.03520  | 1.000000  |
| 20 | h1 | 1 | PEG | H11 | 20 | 0.03520  | 1.000000  |
| 21 | os | 1 | PEG | O2  | 21 | -0.46080 | 16.000000 |
| 22 | c3 | 1 | PEG | C6  | 22 | 0.14520  | 12.000000 |
| 23 | c3 | 1 | PEG | C7  | 23 | 0.16650  | 12.000000 |
| 24 | h1 | 1 | PEG | H12 | 24 | 0.03750  | 1.000000  |
| 25 | h1 | 1 | PEG | H13 | 25 | 0.03750  | 1.000000  |
| 26 | h1 | 1 | PEG | H14 | 26 | 0.03590  | 1.000000  |
| 27 | h1 | 1 | PEG | H15 | 27 | 0.03590  | 1.000000  |
| 28 | os | 1 | PEG | O3  | 28 | -0.45840 | 16.000000 |
| 29 | c3 | 1 | PEG | C8  | 29 | 0.14250  | 12.000000 |
| 30 | c3 | 1 | PEG | C9  | 30 | 0.16720  | 12.000000 |
| 31 | h1 | 1 | PEG | H16 | 31 | 0.03840  | 1.000000  |
| 32 | h1 | 1 | PEG | H17 | 32 | 0.03840  | 1.000000  |
| 33 | h1 | 1 | PEG | H18 | 33 | 0.03580  | 1.000000  |
| 34 | h1 | 1 | PEG | H19 | 34 | 0.03580  | 1.000000  |
| 35 | os | 1 | PEG | O4  | 35 | -0.45880 | 16.000000 |
| 36 | c3 | 1 | PEG | C10 | 36 | 0.14520  | 12.000000 |
| 37 | c3 | 1 | PEG | C11 | 37 | 0.16490  | 12.000000 |
| 38 | h1 | 1 | PEG | H20 | 38 | 0.03820  | 1.000000  |
| 39 | h1 | 1 | PEG | H21 | 39 | 0.03820  | 1.000000  |
| 40 | h1 | 1 | PEG | H22 | 40 | 0.03620  | 1.000000  |
| 41 | h1 | 1 | PEG | H23 | 41 | 0.03620  | 1.000000  |
| 42 | os | 1 | PEG | O5  | 42 | -0.45930 | 16.000000 |
| 43 | c3 | 1 | PEG | C12 | 43 | 0.14480  | 12.000000 |
| 44 | c3 | 1 | PEG | C13 | 44 | 0.16820  | 12.000000 |
| 45 | h1 | 1 | PEG | H24 | 45 | 0.03810  | 1.000000  |
| 46 | h1 | 1 | PEG | H25 | 46 | 0.03810  | 1.000000  |
| 47 | h1 | 1 | PEG | H26 | 47 | 0.03550  | 1.000000  |
| 48 | h1 | 1 | PEG | H27 | 48 | 0.03550  | 1.000000  |
| 49 | os | 1 | PEG | O6  | 49 | -0.46090 | 16.000000 |
| 50 | c3 | 1 | PEG | C14 | 50 | 0.14640  | 12.000000 |
| 51 | c3 | 1 | PEG | C15 | 51 | 0.17050  | 12.000000 |
| 52 | h1 | 1 | PEG | H28 | 52 | 0.03790  | 1.000000  |
| 53 | h1 | 1 | PEG | H29 | 53 | 0.03790  | 1.000000  |
| 54 | h1 | 1 | PEG | H30 | 54 | 0.03470  | 1.000000  |
| 55 | h1 | 1 | PEG | H31 | 55 | 0.03470  | 1.000000  |
| 56 | os | 1 | PEG | O7  | 56 | -0.46270 | 16.000000 |
| 57 | c3 | 1 | PEG | C16 | 57 | 0.14840  | 12.000000 |
| 58 | c3 | 1 | PEG | C17 | 58 | 0.16780  | 12.000000 |
| 59 | h1 | 1 | PEG | H32 | 59 | 0.03660  | 1.000000  |
| 60 | h1 | 1 | PEG | H33 | 60 | 0.03660  | 1.000000  |
| 61 | h1 | 1 | PEG | H34 | 61 | 0.03510  | 1.000000  |
| 62 | h1 | 1 | PEG | H35 | 62 | 0.03510  | 1.000000  |

|    |    |   |     |     |    |          |           |
|----|----|---|-----|-----|----|----------|-----------|
| 63 | os | 1 | PEG | O8  | 63 | -0.45850 | 16.000000 |
| 64 | c3 | 1 | PEG | C18 | 64 | 0.16550  | 12.000000 |
| 65 | c3 | 1 | PEG | C19 | 65 | 0.12040  | 12.000000 |
| 66 | h1 | 1 | PEG | H36 | 66 | 0.03320  | 1.000000  |
| 67 | h1 | 1 | PEG | H37 | 67 | 0.03320  | 1.000000  |
| 68 | h1 | 1 | PEG | H38 | 68 | 0.04170  | 1.000000  |
| 69 | h1 | 1 | PEG | H39 | 69 | 0.04170  | 1.000000  |
| 70 | os | 1 | PEG | O9  | 70 | -0.40190 | 16.000000 |
| 71 | n3 | 1 | PEG | N   | 71 | -1.06590 | 14.000000 |
| 72 | hn | 1 | PEG | H40 | 72 | 0.38830  | 1.000000  |
| 73 | hn | 1 | PEG | H41 | 73 | 0.38830  | 1.000000  |
| 74 | c3 | 1 | PEG | C20 | 74 | 0.03110  | 12.000000 |
| 75 | h1 | 1 | PEG | H42 | 75 | 0.05400  | 1.000000  |
| 76 | h1 | 1 | PEG | H43 | 76 | 0.05400  | 1.000000  |
| 77 | h1 | 1 | PEG | H44 | 77 | 0.05400  | 1.000000  |

[ bonds ]

| ; | at.i | at.j | funct | b0(nm)     | kb(kJ mol <sup>-1</sup> nm <sup>-2</sup> ) | at.i:atom_num_i |
|---|------|------|-------|------------|--------------------------------------------|-----------------|
|   | 1    | 3    | 1     | 1.0930e-01 | 2.8108e+05                                 |                 |
|   | 1    | 4    | 1     | 1.0930e-01 | 2.8108e+05                                 |                 |
|   | 2    | 5    | 1     | 1.0930e-01 | 2.8108e+05                                 |                 |
|   | 2    | 6    | 1     | 1.0930e-01 | 2.8108e+05                                 |                 |
|   | 8    | 10   | 1     | 1.0930e-01 | 2.8108e+05                                 |                 |
|   | 8    | 11   | 1     | 1.0930e-01 | 2.8108e+05                                 |                 |
|   | 9    | 12   | 1     | 1.0930e-01 | 2.8108e+05                                 |                 |
|   | 9    | 13   | 1     | 1.0930e-01 | 2.8108e+05                                 |                 |
|   | 15   | 17   | 1     | 1.0930e-01 | 2.8108e+05                                 |                 |
|   | 15   | 18   | 1     | 1.0930e-01 | 2.8108e+05                                 |                 |
|   | 16   | 19   | 1     | 1.0930e-01 | 2.8108e+05                                 |                 |
|   | 16   | 20   | 1     | 1.0930e-01 | 2.8108e+05                                 |                 |
|   | 22   | 24   | 1     | 1.0930e-01 | 2.8108e+05                                 |                 |
|   | 22   | 25   | 1     | 1.0930e-01 | 2.8108e+05                                 |                 |
|   | 23   | 26   | 1     | 1.0930e-01 | 2.8108e+05                                 |                 |
|   | 23   | 27   | 1     | 1.0930e-01 | 2.8108e+05                                 |                 |
|   | 29   | 31   | 1     | 1.0930e-01 | 2.8108e+05                                 |                 |
|   | 29   | 32   | 1     | 1.0930e-01 | 2.8108e+05                                 |                 |
|   | 30   | 33   | 1     | 1.0930e-01 | 2.8108e+05                                 |                 |
|   | 30   | 34   | 1     | 1.0930e-01 | 2.8108e+05                                 |                 |
|   | 36   | 38   | 1     | 1.0930e-01 | 2.8108e+05                                 |                 |
|   | 36   | 39   | 1     | 1.0930e-01 | 2.8108e+05                                 |                 |
|   | 37   | 40   | 1     | 1.0930e-01 | 2.8108e+05                                 |                 |
|   | 37   | 41   | 1     | 1.0930e-01 | 2.8108e+05                                 |                 |
|   | 43   | 45   | 1     | 1.0930e-01 | 2.8108e+05                                 |                 |
|   | 43   | 46   | 1     | 1.0930e-01 | 2.8108e+05                                 |                 |

|    |    |   |            |            |
|----|----|---|------------|------------|
| 44 | 47 | 1 | 1.0930e-01 | 2.8108e+05 |
| 44 | 48 | 1 | 1.0930e-01 | 2.8108e+05 |
| 50 | 52 | 1 | 1.0930e-01 | 2.8108e+05 |
| 50 | 53 | 1 | 1.0930e-01 | 2.8108e+05 |
| 51 | 54 | 1 | 1.0930e-01 | 2.8108e+05 |
| 51 | 55 | 1 | 1.0930e-01 | 2.8108e+05 |
| 57 | 59 | 1 | 1.0930e-01 | 2.8108e+05 |
| 57 | 60 | 1 | 1.0930e-01 | 2.8108e+05 |
| 58 | 61 | 1 | 1.0930e-01 | 2.8108e+05 |
| 58 | 62 | 1 | 1.0930e-01 | 2.8108e+05 |
| 64 | 66 | 1 | 1.0930e-01 | 2.8108e+05 |
| 64 | 67 | 1 | 1.0930e-01 | 2.8108e+05 |
| 65 | 68 | 1 | 1.0930e-01 | 2.8108e+05 |
| 65 | 69 | 1 | 1.0930e-01 | 2.8108e+05 |
| 71 | 72 | 1 | 1.0180e-01 | 3.2978e+05 |
| 71 | 73 | 1 | 1.0180e-01 | 3.2978e+05 |
| 74 | 75 | 1 | 1.0930e-01 | 2.8108e+05 |
| 74 | 76 | 1 | 1.0930e-01 | 2.8108e+05 |
| 74 | 77 | 1 | 1.0930e-01 | 2.8108e+05 |
| 1  | 2  | 1 | 1.5350e-01 | 2.5363e+05 |
| 1  | 71 | 1 | 1.4700e-01 | 2.6828e+05 |
| 2  | 7  | 1 | 1.4390e-01 | 2.5230e+05 |
| 7  | 8  | 1 | 1.4390e-01 | 2.5230e+05 |
| 8  | 9  | 1 | 1.5350e-01 | 2.5363e+05 |
| 9  | 14 | 1 | 1.4390e-01 | 2.5230e+05 |
| 14 | 15 | 1 | 1.4390e-01 | 2.5230e+05 |
| 15 | 16 | 1 | 1.5350e-01 | 2.5363e+05 |
| 16 | 21 | 1 | 1.4390e-01 | 2.5230e+05 |
| 21 | 22 | 1 | 1.4390e-01 | 2.5230e+05 |
| 22 | 23 | 1 | 1.5350e-01 | 2.5363e+05 |
| 23 | 28 | 1 | 1.4390e-01 | 2.5230e+05 |
| 28 | 29 | 1 | 1.4390e-01 | 2.5230e+05 |
| 29 | 30 | 1 | 1.5350e-01 | 2.5363e+05 |
| 30 | 35 | 1 | 1.4390e-01 | 2.5230e+05 |
| 35 | 36 | 1 | 1.4390e-01 | 2.5230e+05 |
| 36 | 37 | 1 | 1.5350e-01 | 2.5363e+05 |
| 37 | 42 | 1 | 1.4390e-01 | 2.5230e+05 |
| 42 | 43 | 1 | 1.4390e-01 | 2.5230e+05 |
| 43 | 44 | 1 | 1.5350e-01 | 2.5363e+05 |
| 44 | 49 | 1 | 1.4390e-01 | 2.5230e+05 |
| 49 | 50 | 1 | 1.4390e-01 | 2.5230e+05 |
| 50 | 51 | 1 | 1.5350e-01 | 2.5363e+05 |
| 51 | 56 | 1 | 1.4390e-01 | 2.5230e+05 |
| 56 | 57 | 1 | 1.4390e-01 | 2.5230e+05 |

|    |    |   |            |            |
|----|----|---|------------|------------|
| 57 | 58 | 1 | 1.5350e-01 | 2.5363e+05 |
| 58 | 63 | 1 | 1.4390e-01 | 2.5230e+05 |
| 63 | 64 | 1 | 1.4390e-01 | 2.5230e+05 |
| 64 | 65 | 1 | 1.5350e-01 | 2.5363e+05 |
| 65 | 70 | 1 | 1.4390e-01 | 2.5230e+05 |
| 70 | 74 | 1 | 1.4390e-01 | 2.5230e+05 |

[ pairs ]

| ; at.i | at.j | funct |
|--------|------|-------|
| 2      | 72   | 1     |
| 2      | 73   | 1     |
| 2      | 10   | 1     |
| 2      | 11   | 1     |
| 3      | 5    | 1     |
| 3      | 6    | 1     |
| 3      | 7    | 1     |
| 3      | 72   | 1     |
| 3      | 73   | 1     |
| 4      | 5    | 1     |
| 4      | 6    | 1     |
| 4      | 7    | 1     |
| 4      | 72   | 1     |
| 4      | 73   | 1     |
| 71     | 5    | 1     |
| 5      | 8    | 1     |
| 71     | 6    | 1     |
| 6      | 8    | 1     |
| 7      | 12   | 1     |
| 7      | 13   | 1     |
| 9      | 17   | 1     |
| 9      | 18   | 1     |
| 10     | 12   | 1     |
| 10     | 13   | 1     |
| 10     | 14   | 1     |
| 11     | 12   | 1     |
| 11     | 13   | 1     |
| 11     | 14   | 1     |
| 12     | 15   | 1     |
| 13     | 15   | 1     |
| 14     | 19   | 1     |
| 14     | 20   | 1     |
| 16     | 24   | 1     |
| 16     | 25   | 1     |
| 17     | 19   | 1     |

|    |    |   |
|----|----|---|
| 17 | 20 | 1 |
| 17 | 21 | 1 |
| 18 | 19 | 1 |
| 18 | 20 | 1 |
| 18 | 21 | 1 |
| 19 | 22 | 1 |
| 20 | 22 | 1 |
| 21 | 26 | 1 |
| 21 | 27 | 1 |
| 23 | 31 | 1 |
| 23 | 32 | 1 |
| 24 | 26 | 1 |
| 24 | 27 | 1 |
| 24 | 28 | 1 |
| 25 | 26 | 1 |
| 25 | 27 | 1 |
| 25 | 28 | 1 |
| 26 | 29 | 1 |
| 27 | 29 | 1 |
| 28 | 33 | 1 |
| 28 | 34 | 1 |
| 30 | 38 | 1 |
| 30 | 39 | 1 |
| 31 | 33 | 1 |
| 31 | 34 | 1 |
| 31 | 35 | 1 |
| 32 | 33 | 1 |
| 32 | 34 | 1 |
| 32 | 35 | 1 |
| 33 | 36 | 1 |
| 34 | 36 | 1 |
| 35 | 40 | 1 |
| 35 | 41 | 1 |
| 37 | 45 | 1 |
| 37 | 46 | 1 |
| 38 | 40 | 1 |
| 38 | 41 | 1 |
| 38 | 42 | 1 |
| 39 | 40 | 1 |
| 39 | 41 | 1 |
| 39 | 42 | 1 |
| 40 | 43 | 1 |
| 41 | 43 | 1 |
| 42 | 47 | 1 |

|    |    |   |
|----|----|---|
| 42 | 48 | 1 |
| 44 | 52 | 1 |
| 44 | 53 | 1 |
| 45 | 47 | 1 |
| 45 | 48 | 1 |
| 45 | 49 | 1 |
| 46 | 47 | 1 |
| 46 | 48 | 1 |
| 46 | 49 | 1 |
| 47 | 50 | 1 |
| 48 | 50 | 1 |
| 49 | 54 | 1 |
| 49 | 55 | 1 |
| 51 | 59 | 1 |
| 51 | 60 | 1 |
| 52 | 54 | 1 |
| 52 | 55 | 1 |
| 52 | 56 | 1 |
| 53 | 54 | 1 |
| 53 | 55 | 1 |
| 53 | 56 | 1 |
| 54 | 57 | 1 |
| 55 | 57 | 1 |
| 56 | 61 | 1 |
| 56 | 62 | 1 |
| 58 | 66 | 1 |
| 58 | 67 | 1 |
| 59 | 61 | 1 |
| 59 | 62 | 1 |
| 59 | 63 | 1 |
| 60 | 61 | 1 |
| 60 | 62 | 1 |
| 60 | 63 | 1 |
| 61 | 64 | 1 |
| 62 | 64 | 1 |
| 63 | 68 | 1 |
| 63 | 69 | 1 |
| 65 | 75 | 1 |
| 65 | 76 | 1 |
| 65 | 77 | 1 |
| 66 | 68 | 1 |
| 66 | 69 | 1 |
| 66 | 70 | 1 |
| 67 | 68 | 1 |



|    |    |   |
|----|----|---|
| 67 | 69 | 1 |
| 67 | 70 | 1 |
| 68 | 74 | 1 |
| 69 | 74 | 1 |
| 1  | 8  | 1 |
| 2  | 9  | 1 |
| 71 | 7  | 1 |
| 7  | 14 | 1 |
| 8  | 15 | 1 |
| 9  | 16 | 1 |
| 14 | 21 | 1 |
| 15 | 22 | 1 |
| 16 | 23 | 1 |
| 21 | 28 | 1 |
| 22 | 29 | 1 |
| 23 | 30 | 1 |
| 28 | 35 | 1 |
| 29 | 36 | 1 |
| 30 | 37 | 1 |
| 35 | 42 | 1 |
| 36 | 43 | 1 |
| 37 | 44 | 1 |
| 42 | 49 | 1 |
| 43 | 50 | 1 |
| 44 | 51 | 1 |
| 49 | 56 | 1 |
| 50 | 57 | 1 |
| 51 | 58 | 1 |
| 56 | 63 | 1 |
| 57 | 64 | 1 |
| 58 | 65 | 1 |
| 63 | 70 | 1 |
| 64 | 74 | 1 |

[ angles ]

| ; at.i | at.j | at.k | funct | theta(deg) | cth(kJ mol <sup>-1</sup> rad <sup>-2</sup> ) |
|--------|------|------|-------|------------|----------------------------------------------|
| 1      | 2    | 5    | 1     | 1.1007e+02 | 3.8794e+02                                   |
| 1      | 2    | 6    | 1     | 1.1007e+02 | 3.8794e+02                                   |
| 1      | 71   | 72   | 1     | 1.0992e+02 | 3.9438e+02                                   |
| 1      | 71   | 73   | 1     | 1.0992e+02 | 3.9438e+02                                   |
| 2      | 1    | 3    | 1     | 1.1007e+02 | 3.8794e+02                                   |
| 2      | 1    | 4    | 1     | 1.1007e+02 | 3.8794e+02                                   |
| 3      | 1    | 4    | 1     | 1.0955e+02 | 3.2786e+02                                   |
| 3      | 1    | 71   | 1     | 1.0992e+02 | 4.1330e+02                                   |

|    |    |    |   |            |            |
|----|----|----|---|------------|------------|
| 4  | 1  | 71 | 1 | 1.0992e+02 | 4.1330e+02 |
| 5  | 2  | 6  | 1 | 1.0955e+02 | 3.2786e+02 |
| 5  | 2  | 7  | 1 | 1.0882e+02 | 4.2543e+02 |
| 6  | 2  | 7  | 1 | 1.0882e+02 | 4.2543e+02 |
| 7  | 8  | 10 | 1 | 1.0882e+02 | 4.2543e+02 |
| 7  | 8  | 11 | 1 | 1.0882e+02 | 4.2543e+02 |
| 8  | 9  | 12 | 1 | 1.1007e+02 | 3.8794e+02 |
| 8  | 9  | 13 | 1 | 1.1007e+02 | 3.8794e+02 |
| 9  | 8  | 10 | 1 | 1.1007e+02 | 3.8794e+02 |
| 9  | 8  | 11 | 1 | 1.1007e+02 | 3.8794e+02 |
| 10 | 8  | 11 | 1 | 1.0955e+02 | 3.2786e+02 |
| 12 | 9  | 13 | 1 | 1.0955e+02 | 3.2786e+02 |
| 12 | 9  | 14 | 1 | 1.0882e+02 | 4.2543e+02 |
| 13 | 9  | 14 | 1 | 1.0882e+02 | 4.2543e+02 |
| 14 | 15 | 17 | 1 | 1.0882e+02 | 4.2543e+02 |
| 14 | 15 | 18 | 1 | 1.0882e+02 | 4.2543e+02 |
| 15 | 16 | 19 | 1 | 1.1007e+02 | 3.8794e+02 |
| 15 | 16 | 20 | 1 | 1.1007e+02 | 3.8794e+02 |
| 16 | 15 | 17 | 1 | 1.1007e+02 | 3.8794e+02 |
| 16 | 15 | 18 | 1 | 1.1007e+02 | 3.8794e+02 |
| 17 | 15 | 18 | 1 | 1.0955e+02 | 3.2786e+02 |
| 19 | 16 | 20 | 1 | 1.0955e+02 | 3.2786e+02 |
| 19 | 16 | 21 | 1 | 1.0882e+02 | 4.2543e+02 |
| 20 | 16 | 21 | 1 | 1.0882e+02 | 4.2543e+02 |
| 21 | 22 | 24 | 1 | 1.0882e+02 | 4.2543e+02 |
| 21 | 22 | 25 | 1 | 1.0882e+02 | 4.2543e+02 |
| 22 | 23 | 26 | 1 | 1.1007e+02 | 3.8794e+02 |
| 22 | 23 | 27 | 1 | 1.1007e+02 | 3.8794e+02 |
| 23 | 22 | 24 | 1 | 1.1007e+02 | 3.8794e+02 |
| 23 | 22 | 25 | 1 | 1.1007e+02 | 3.8794e+02 |
| 24 | 22 | 25 | 1 | 1.0955e+02 | 3.2786e+02 |
| 26 | 23 | 27 | 1 | 1.0955e+02 | 3.2786e+02 |
| 26 | 23 | 28 | 1 | 1.0882e+02 | 4.2543e+02 |
| 27 | 23 | 28 | 1 | 1.0882e+02 | 4.2543e+02 |
| 28 | 29 | 31 | 1 | 1.0882e+02 | 4.2543e+02 |
| 28 | 29 | 32 | 1 | 1.0882e+02 | 4.2543e+02 |
| 29 | 30 | 33 | 1 | 1.1007e+02 | 3.8794e+02 |
| 29 | 30 | 34 | 1 | 1.1007e+02 | 3.8794e+02 |
| 30 | 29 | 31 | 1 | 1.1007e+02 | 3.8794e+02 |
| 30 | 29 | 32 | 1 | 1.1007e+02 | 3.8794e+02 |
| 31 | 29 | 32 | 1 | 1.0955e+02 | 3.2786e+02 |
| 33 | 30 | 34 | 1 | 1.0955e+02 | 3.2786e+02 |
| 33 | 30 | 35 | 1 | 1.0882e+02 | 4.2543e+02 |
| 34 | 30 | 35 | 1 | 1.0882e+02 | 4.2543e+02 |

|    |    |    |   |            |            |
|----|----|----|---|------------|------------|
| 35 | 36 | 38 | 1 | 1.0882e+02 | 4.2543e+02 |
| 35 | 36 | 39 | 1 | 1.0882e+02 | 4.2543e+02 |
| 36 | 37 | 40 | 1 | 1.1007e+02 | 3.8794e+02 |
| 36 | 37 | 41 | 1 | 1.1007e+02 | 3.8794e+02 |
| 37 | 36 | 38 | 1 | 1.1007e+02 | 3.8794e+02 |
| 37 | 36 | 39 | 1 | 1.1007e+02 | 3.8794e+02 |
| 38 | 36 | 39 | 1 | 1.0955e+02 | 3.2786e+02 |
| 40 | 37 | 41 | 1 | 1.0955e+02 | 3.2786e+02 |
| 40 | 37 | 42 | 1 | 1.0882e+02 | 4.2543e+02 |
| 41 | 37 | 42 | 1 | 1.0882e+02 | 4.2543e+02 |
| 42 | 43 | 45 | 1 | 1.0882e+02 | 4.2543e+02 |
| 42 | 43 | 46 | 1 | 1.0882e+02 | 4.2543e+02 |
| 43 | 44 | 47 | 1 | 1.1007e+02 | 3.8794e+02 |
| 43 | 44 | 48 | 1 | 1.1007e+02 | 3.8794e+02 |
| 44 | 43 | 45 | 1 | 1.1007e+02 | 3.8794e+02 |
| 44 | 43 | 46 | 1 | 1.1007e+02 | 3.8794e+02 |
| 45 | 43 | 46 | 1 | 1.0955e+02 | 3.2786e+02 |
| 47 | 44 | 48 | 1 | 1.0955e+02 | 3.2786e+02 |
| 47 | 44 | 49 | 1 | 1.0882e+02 | 4.2543e+02 |
| 48 | 44 | 49 | 1 | 1.0882e+02 | 4.2543e+02 |
| 49 | 50 | 52 | 1 | 1.0882e+02 | 4.2543e+02 |
| 49 | 50 | 53 | 1 | 1.0882e+02 | 4.2543e+02 |
| 50 | 51 | 54 | 1 | 1.1007e+02 | 3.8794e+02 |
| 50 | 51 | 55 | 1 | 1.1007e+02 | 3.8794e+02 |
| 51 | 50 | 52 | 1 | 1.1007e+02 | 3.8794e+02 |
| 51 | 50 | 53 | 1 | 1.1007e+02 | 3.8794e+02 |
| 52 | 50 | 53 | 1 | 1.0955e+02 | 3.2786e+02 |
| 54 | 51 | 55 | 1 | 1.0955e+02 | 3.2786e+02 |
| 54 | 51 | 56 | 1 | 1.0882e+02 | 4.2543e+02 |
| 55 | 51 | 56 | 1 | 1.0882e+02 | 4.2543e+02 |
| 56 | 57 | 59 | 1 | 1.0882e+02 | 4.2543e+02 |
| 56 | 57 | 60 | 1 | 1.0882e+02 | 4.2543e+02 |
| 57 | 58 | 61 | 1 | 1.1007e+02 | 3.8794e+02 |
| 57 | 58 | 62 | 1 | 1.1007e+02 | 3.8794e+02 |
| 58 | 57 | 59 | 1 | 1.1007e+02 | 3.8794e+02 |
| 58 | 57 | 60 | 1 | 1.1007e+02 | 3.8794e+02 |
| 59 | 57 | 60 | 1 | 1.0955e+02 | 3.2786e+02 |
| 61 | 58 | 62 | 1 | 1.0955e+02 | 3.2786e+02 |
| 61 | 58 | 63 | 1 | 1.0882e+02 | 4.2543e+02 |
| 62 | 58 | 63 | 1 | 1.0882e+02 | 4.2543e+02 |
| 63 | 64 | 66 | 1 | 1.0882e+02 | 4.2543e+02 |
| 63 | 64 | 67 | 1 | 1.0882e+02 | 4.2543e+02 |
| 64 | 65 | 68 | 1 | 1.1007e+02 | 3.8794e+02 |
| 64 | 65 | 69 | 1 | 1.1007e+02 | 3.8794e+02 |

|    |    |    |   |            |            |
|----|----|----|---|------------|------------|
| 65 | 64 | 66 | 1 | 1.1007e+02 | 3.8794e+02 |
| 65 | 64 | 67 | 1 | 1.1007e+02 | 3.8794e+02 |
| 66 | 64 | 67 | 1 | 1.0955e+02 | 3.2786e+02 |
| 68 | 65 | 69 | 1 | 1.0955e+02 | 3.2786e+02 |
| 68 | 65 | 70 | 1 | 1.0882e+02 | 4.2543e+02 |
| 69 | 65 | 70 | 1 | 1.0882e+02 | 4.2543e+02 |
| 70 | 74 | 75 | 1 | 1.0882e+02 | 4.2543e+02 |
| 70 | 74 | 76 | 1 | 1.0882e+02 | 4.2543e+02 |
| 70 | 74 | 77 | 1 | 1.0882e+02 | 4.2543e+02 |
| 72 | 71 | 73 | 1 | 1.0713e+02 | 3.4560e+02 |
| 75 | 74 | 76 | 1 | 1.0955e+02 | 3.2786e+02 |
| 75 | 74 | 77 | 1 | 1.0955e+02 | 3.2786e+02 |
| 76 | 74 | 77 | 1 | 1.0955e+02 | 3.2786e+02 |
| 1  | 2  | 7  | 1 | 1.0842e+02 | 5.6718e+02 |
| 2  | 1  | 71 | 1 | 1.1038e+02 | 5.5379e+02 |
| 2  | 7  | 8  | 1 | 1.1245e+02 | 5.2208e+02 |
| 7  | 8  | 9  | 1 | 1.0842e+02 | 5.6718e+02 |
| 8  | 9  | 14 | 1 | 1.0842e+02 | 5.6718e+02 |
| 9  | 14 | 15 | 1 | 1.1245e+02 | 5.2208e+02 |
| 14 | 15 | 16 | 1 | 1.0842e+02 | 5.6718e+02 |
| 15 | 16 | 21 | 1 | 1.0842e+02 | 5.6718e+02 |
| 16 | 21 | 22 | 1 | 1.1245e+02 | 5.2208e+02 |
| 21 | 22 | 23 | 1 | 1.0842e+02 | 5.6718e+02 |
| 22 | 23 | 28 | 1 | 1.0842e+02 | 5.6718e+02 |
| 23 | 28 | 29 | 1 | 1.1245e+02 | 5.2208e+02 |
| 28 | 29 | 30 | 1 | 1.0842e+02 | 5.6718e+02 |
| 29 | 30 | 35 | 1 | 1.0842e+02 | 5.6718e+02 |
| 30 | 35 | 36 | 1 | 1.1245e+02 | 5.2208e+02 |
| 35 | 36 | 37 | 1 | 1.0842e+02 | 5.6718e+02 |
| 36 | 37 | 42 | 1 | 1.0842e+02 | 5.6718e+02 |
| 37 | 42 | 43 | 1 | 1.1245e+02 | 5.2208e+02 |
| 42 | 43 | 44 | 1 | 1.0842e+02 | 5.6718e+02 |
| 43 | 44 | 49 | 1 | 1.0842e+02 | 5.6718e+02 |
| 44 | 49 | 50 | 1 | 1.1245e+02 | 5.2208e+02 |
| 49 | 50 | 51 | 1 | 1.0842e+02 | 5.6718e+02 |
| 50 | 51 | 56 | 1 | 1.0842e+02 | 5.6718e+02 |
| 51 | 56 | 57 | 1 | 1.1245e+02 | 5.2208e+02 |
| 56 | 57 | 58 | 1 | 1.0842e+02 | 5.6718e+02 |
| 57 | 58 | 63 | 1 | 1.0842e+02 | 5.6718e+02 |
| 58 | 63 | 64 | 1 | 1.1245e+02 | 5.2208e+02 |
| 63 | 64 | 65 | 1 | 1.0842e+02 | 5.6718e+02 |
| 64 | 65 | 70 | 1 | 1.0842e+02 | 5.6718e+02 |
| 65 | 70 | 74 | 1 | 1.1245e+02 | 5.2208e+02 |

## [ dihedrals ]

| ; | at.i | at.j | at.k | at.l | funct | C0(kJ mol <sup>-1</sup> ) | C1(kJ mol <sup>-1</sup> ) | C2(kJ mol <sup>-1</sup> ) | C3(kJ mol <sup>-1</sup> ) | C4(kJ mol <sup>-1</sup> ) | C5(kJ mol <sup>-1</sup> ) | ; |
|---|------|------|------|------|-------|---------------------------|---------------------------|---------------------------|---------------------------|---------------------------|---------------------------|---|
|   | 2    | 1    | 71   | 72   | 3     | 1.25520                   | 3.76560                   | 0.00000                   | -5.02080                  | 0.00000                   | 0.00000                   | ; |
|   | 2    | 1    | 71   | 73   | 3     | 1.25520                   | 3.76560                   | 0.00000                   | -5.02080                  | 0.00000                   | 0.00000                   | ; |
|   | 2    | 7    | 8    | 10   | 3     | 1.60247                   | 4.80742                   | 0.00000                   | -6.40989                  | 0.00000                   | 0.00000                   | ; |
|   | 2    | 7    | 8    | 11   | 3     | 1.60247                   | 4.80742                   | 0.00000                   | -6.40989                  | 0.00000                   | 0.00000                   | ; |
|   | 3    | 1    | 2    | 5    | 3     | 0.65270                   | 1.95811                   | 0.00000                   | -2.61082                  | 0.00000                   | 0.00000                   | ; |
|   | 3    | 1    | 2    | 6    | 3     | 0.65270                   | 1.95811                   | 0.00000                   | -2.61082                  | 0.00000                   | 0.00000                   | ; |
|   | 3    | 1    | 2    | 7    | 3     | 1.04600                   | -1.04600                  | 0.00000                   | 0.00000                   | 0.00000                   | 0.00000                   | ; |
|   | 3    | 1    | 71   | 72   | 3     | 1.25520                   | 3.76560                   | 0.00000                   | -5.02080                  | 0.00000                   | 0.00000                   | ; |
|   | 3    | 1    | 71   | 73   | 3     | 1.25520                   | 3.76560                   | 0.00000                   | -5.02080                  | 0.00000                   | 0.00000                   | ; |
|   | 4    | 1    | 2    | 5    | 3     | 0.65270                   | 1.95811                   | 0.00000                   | -2.61082                  | 0.00000                   | 0.00000                   | ; |
|   | 4    | 1    | 2    | 6    | 3     | 0.65270                   | 1.95811                   | 0.00000                   | -2.61082                  | 0.00000                   | 0.00000                   | ; |
|   | 4    | 1    | 2    | 7    | 3     | 1.04600                   | -1.04600                  | 0.00000                   | 0.00000                   | 0.00000                   | 0.00000                   | ; |
|   | 4    | 1    | 71   | 72   | 3     | 1.25520                   | 3.76560                   | 0.00000                   | -5.02080                  | 0.00000                   | 0.00000                   | ; |
|   | 4    | 1    | 71   | 73   | 3     | 1.25520                   | 3.76560                   | 0.00000                   | -5.02080                  | 0.00000                   | 0.00000                   | ; |
|   | 71   | 1    | 2    | 5    | 3     | 0.65270                   | 1.95811                   | 0.00000                   | -2.61082                  | 0.00000                   | 0.00000                   | ; |
|   | 5    | 2    | 7    | 8    | 3     | 1.60247                   | 4.80742                   | 0.00000                   | -6.40989                  | 0.00000                   | 0.00000                   | ; |
|   | 71   | 1    | 2    | 6    | 3     | 0.65270                   | 1.95811                   | 0.00000                   | -2.61082                  | 0.00000                   | 0.00000                   | ; |
|   | 6    | 2    | 7    | 8    | 3     | 1.60247                   | 4.80742                   | 0.00000                   | -6.40989                  | 0.00000                   | 0.00000                   | ; |
|   | 7    | 8    | 9    | 12   | 3     | 1.04600                   | -1.04600                  | 0.00000                   | 0.00000                   | 0.00000                   | 0.00000                   | ; |
|   | 7    | 8    | 9    | 13   | 3     | 1.04600                   | -1.04600                  | 0.00000                   | 0.00000                   | 0.00000                   | 0.00000                   | ; |
|   | 9    | 14   | 15   | 17   | 3     | 1.60247                   | 4.80742                   | 0.00000                   | -6.40989                  | 0.00000                   | 0.00000                   | ; |
|   | 9    | 14   | 15   | 18   | 3     | 1.60247                   | 4.80742                   | 0.00000                   | -6.40989                  | 0.00000                   | 0.00000                   | ; |
|   | 10   | 8    | 9    | 12   | 3     | 0.65270                   | 1.95811                   | 0.00000                   | -2.61082                  | 0.00000                   | 0.00000                   | ; |
|   | 10   | 8    | 9    | 13   | 3     | 0.65270                   | 1.95811                   | 0.00000                   | -2.61082                  | 0.00000                   | 0.00000                   | ; |
|   | 10   | 8    | 9    | 14   | 3     | 1.04600                   | -1.04600                  | 0.00000                   | 0.00000                   | 0.00000                   | 0.00000                   | ; |
|   | 11   | 8    | 9    | 12   | 3     | 0.65270                   | 1.95811                   | 0.00000                   | -2.61082                  | 0.00000                   | 0.00000                   | ; |
|   | 11   | 8    | 9    | 13   | 3     | 0.65270                   | 1.95811                   | 0.00000                   | -2.61082                  | 0.00000                   | 0.00000                   | ; |
|   | 11   | 8    | 9    | 14   | 3     | 1.04600                   | -1.04600                  | 0.00000                   | 0.00000                   | 0.00000                   | 0.00000                   | ; |
|   | 12   | 9    | 14   | 15   | 3     | 1.60247                   | 4.80742                   | 0.00000                   | -6.40989                  | 0.00000                   | 0.00000                   | ; |
|   | 13   | 9    | 14   | 15   | 3     | 1.60247                   | 4.80742                   | 0.00000                   | -6.40989                  | 0.00000                   | 0.00000                   | ; |
|   | 14   | 15   | 16   | 19   | 3     | 1.04600                   | -1.04600                  | 0.00000                   | 0.00000                   | 0.00000                   | 0.00000                   | ; |
|   | 14   | 15   | 16   | 20   | 3     | 1.04600                   | -1.04600                  | 0.00000                   | 0.00000                   | 0.00000                   | 0.00000                   | ; |
|   | 16   | 21   | 22   | 24   | 3     | 1.60247                   | 4.80742                   | 0.00000                   | -6.40989                  | 0.00000                   | 0.00000                   | ; |
|   | 16   | 21   | 22   | 25   | 3     | 1.60247                   | 4.80742                   | 0.00000                   | -6.40989                  | 0.00000                   | 0.00000                   | ; |
|   | 17   | 15   | 16   | 19   | 3     | 0.65270                   | 1.95811                   | 0.00000                   | -2.61082                  | 0.00000                   | 0.00000                   | ; |
|   | 17   | 15   | 16   | 20   | 3     | 0.65270                   | 1.95811                   | 0.00000                   | -2.61082                  | 0.00000                   | 0.00000                   | ; |
|   | 17   | 15   | 16   | 21   | 3     | 1.04600                   | -1.04600                  | 0.00000                   | 0.00000                   | 0.00000                   | 0.00000                   | ; |
|   | 18   | 15   | 16   | 19   | 3     | 0.65270                   | 1.95811                   | 0.00000                   | -2.61082                  | 0.00000                   | 0.00000                   | ; |
|   | 18   | 15   | 16   | 20   | 3     | 0.65270                   | 1.95811                   | 0.00000                   | -2.61082                  | 0.00000                   | 0.00000                   | ; |
|   | 18   | 15   | 16   | 21   | 3     | 1.04600                   | -1.04600                  | 0.00000                   | 0.00000                   | 0.00000                   | 0.00000                   | ; |
|   | 19   | 16   | 21   | 22   | 3     | 1.60247                   | 4.80742                   | 0.00000                   | -6.40989                  | 0.00000                   | 0.00000                   | ; |
|   | 20   | 16   | 21   | 22   | 3     | 1.60247                   | 4.80742                   | 0.00000                   | -6.40989                  | 0.00000                   | 0.00000                   | ; |

|    |    |    |    |   |         |          |         |          |         |         |   |
|----|----|----|----|---|---------|----------|---------|----------|---------|---------|---|
| 21 | 22 | 23 | 26 | 3 | 1.04600 | -1.04600 | 0.00000 | 0.00000  | 0.00000 | 0.00000 | ; |
| 21 | 22 | 23 | 27 | 3 | 1.04600 | -1.04600 | 0.00000 | 0.00000  | 0.00000 | 0.00000 | ; |
| 23 | 28 | 29 | 31 | 3 | 1.60247 | 4.80742  | 0.00000 | -6.40989 | 0.00000 | 0.00000 | ; |
| 23 | 28 | 29 | 32 | 3 | 1.60247 | 4.80742  | 0.00000 | -6.40989 | 0.00000 | 0.00000 | ; |
| 24 | 22 | 23 | 26 | 3 | 0.65270 | 1.95811  | 0.00000 | -2.61082 | 0.00000 | 0.00000 | ; |
| 24 | 22 | 23 | 27 | 3 | 0.65270 | 1.95811  | 0.00000 | -2.61082 | 0.00000 | 0.00000 | ; |
| 24 | 22 | 23 | 28 | 3 | 1.04600 | -1.04600 | 0.00000 | 0.00000  | 0.00000 | 0.00000 | ; |
| 25 | 22 | 23 | 26 | 3 | 0.65270 | 1.95811  | 0.00000 | -2.61082 | 0.00000 | 0.00000 | ; |
| 25 | 22 | 23 | 27 | 3 | 0.65270 | 1.95811  | 0.00000 | -2.61082 | 0.00000 | 0.00000 | ; |
| 25 | 22 | 23 | 28 | 3 | 1.04600 | -1.04600 | 0.00000 | 0.00000  | 0.00000 | 0.00000 | ; |
| 26 | 23 | 28 | 29 | 3 | 1.60247 | 4.80742  | 0.00000 | -6.40989 | 0.00000 | 0.00000 | ; |
| 27 | 23 | 28 | 29 | 3 | 1.60247 | 4.80742  | 0.00000 | -6.40989 | 0.00000 | 0.00000 | ; |
| 28 | 29 | 30 | 33 | 3 | 1.04600 | -1.04600 | 0.00000 | 0.00000  | 0.00000 | 0.00000 | ; |
| 28 | 29 | 30 | 34 | 3 | 1.04600 | -1.04600 | 0.00000 | 0.00000  | 0.00000 | 0.00000 | ; |
| 30 | 35 | 36 | 38 | 3 | 1.60247 | 4.80742  | 0.00000 | -6.40989 | 0.00000 | 0.00000 | ; |
| 30 | 35 | 36 | 39 | 3 | 1.60247 | 4.80742  | 0.00000 | -6.40989 | 0.00000 | 0.00000 | ; |
| 31 | 29 | 30 | 33 | 3 | 0.65270 | 1.95811  | 0.00000 | -2.61082 | 0.00000 | 0.00000 | ; |
| 31 | 29 | 30 | 34 | 3 | 0.65270 | 1.95811  | 0.00000 | -2.61082 | 0.00000 | 0.00000 | ; |
| 31 | 29 | 30 | 35 | 3 | 1.04600 | -1.04600 | 0.00000 | 0.00000  | 0.00000 | 0.00000 | ; |
| 32 | 29 | 30 | 33 | 3 | 0.65270 | 1.95811  | 0.00000 | -2.61082 | 0.00000 | 0.00000 | ; |
| 32 | 29 | 30 | 34 | 3 | 0.65270 | 1.95811  | 0.00000 | -2.61082 | 0.00000 | 0.00000 | ; |
| 32 | 29 | 30 | 35 | 3 | 1.04600 | -1.04600 | 0.00000 | 0.00000  | 0.00000 | 0.00000 | ; |
| 33 | 30 | 35 | 36 | 3 | 1.60247 | 4.80742  | 0.00000 | -6.40989 | 0.00000 | 0.00000 | ; |
| 34 | 30 | 35 | 36 | 3 | 1.60247 | 4.80742  | 0.00000 | -6.40989 | 0.00000 | 0.00000 | ; |
| 35 | 36 | 37 | 40 | 3 | 1.04600 | -1.04600 | 0.00000 | 0.00000  | 0.00000 | 0.00000 | ; |
| 35 | 36 | 37 | 41 | 3 | 1.04600 | -1.04600 | 0.00000 | 0.00000  | 0.00000 | 0.00000 | ; |
| 37 | 42 | 43 | 45 | 3 | 1.60247 | 4.80742  | 0.00000 | -6.40989 | 0.00000 | 0.00000 | ; |
| 37 | 42 | 43 | 46 | 3 | 1.60247 | 4.80742  | 0.00000 | -6.40989 | 0.00000 | 0.00000 | ; |
| 38 | 36 | 37 | 40 | 3 | 0.65270 | 1.95811  | 0.00000 | -2.61082 | 0.00000 | 0.00000 | ; |
| 38 | 36 | 37 | 41 | 3 | 0.65270 | 1.95811  | 0.00000 | -2.61082 | 0.00000 | 0.00000 | ; |
| 38 | 36 | 37 | 42 | 3 | 1.04600 | -1.04600 | 0.00000 | 0.00000  | 0.00000 | 0.00000 | ; |
| 39 | 36 | 37 | 40 | 3 | 0.65270 | 1.95811  | 0.00000 | -2.61082 | 0.00000 | 0.00000 | ; |
| 39 | 36 | 37 | 41 | 3 | 0.65270 | 1.95811  | 0.00000 | -2.61082 | 0.00000 | 0.00000 | ; |
| 39 | 36 | 37 | 42 | 3 | 1.04600 | -1.04600 | 0.00000 | 0.00000  | 0.00000 | 0.00000 | ; |
| 40 | 37 | 42 | 43 | 3 | 1.60247 | 4.80742  | 0.00000 | -6.40989 | 0.00000 | 0.00000 | ; |
| 41 | 37 | 42 | 43 | 3 | 1.60247 | 4.80742  | 0.00000 | -6.40989 | 0.00000 | 0.00000 | ; |
| 42 | 43 | 44 | 47 | 3 | 1.04600 | -1.04600 | 0.00000 | 0.00000  | 0.00000 | 0.00000 | ; |
| 42 | 43 | 44 | 48 | 3 | 1.04600 | -1.04600 | 0.00000 | 0.00000  | 0.00000 | 0.00000 | ; |
| 44 | 49 | 50 | 52 | 3 | 1.60247 | 4.80742  | 0.00000 | -6.40989 | 0.00000 | 0.00000 | ; |
| 44 | 49 | 50 | 53 | 3 | 1.60247 | 4.80742  | 0.00000 | -6.40989 | 0.00000 | 0.00000 | ; |
| 45 | 43 | 44 | 47 | 3 | 0.65270 | 1.95811  | 0.00000 | -2.61082 | 0.00000 | 0.00000 | ; |
| 45 | 43 | 44 | 48 | 3 | 0.65270 | 1.95811  | 0.00000 | -2.61082 | 0.00000 | 0.00000 | ; |
| 45 | 43 | 44 | 49 | 3 | 1.04600 | -1.04600 | 0.00000 | 0.00000  | 0.00000 | 0.00000 | ; |
| 46 | 43 | 44 | 47 | 3 | 0.65270 | 1.95811  | 0.00000 | -2.61082 | 0.00000 | 0.00000 | ; |

|    |    |    |    |   |         |          |          |          |         |         |   |
|----|----|----|----|---|---------|----------|----------|----------|---------|---------|---|
| 46 | 43 | 44 | 48 | 3 | 0.65270 | 1.95811  | 0.00000  | -2.61082 | 0.00000 | 0.00000 | ; |
| 46 | 43 | 44 | 49 | 3 | 1.04600 | -1.04600 | 0.00000  | 0.00000  | 0.00000 | 0.00000 | ; |
| 47 | 44 | 49 | 50 | 3 | 1.60247 | 4.80742  | 0.00000  | -6.40989 | 0.00000 | 0.00000 | ; |
| 48 | 44 | 49 | 50 | 3 | 1.60247 | 4.80742  | 0.00000  | -6.40989 | 0.00000 | 0.00000 | ; |
| 49 | 50 | 51 | 54 | 3 | 1.04600 | -1.04600 | 0.00000  | 0.00000  | 0.00000 | 0.00000 | ; |
| 49 | 50 | 51 | 55 | 3 | 1.04600 | -1.04600 | 0.00000  | 0.00000  | 0.00000 | 0.00000 | ; |
| 51 | 56 | 57 | 59 | 3 | 1.60247 | 4.80742  | 0.00000  | -6.40989 | 0.00000 | 0.00000 | ; |
| 51 | 56 | 57 | 60 | 3 | 1.60247 | 4.80742  | 0.00000  | -6.40989 | 0.00000 | 0.00000 | ; |
| 52 | 50 | 51 | 54 | 3 | 0.65270 | 1.95811  | 0.00000  | -2.61082 | 0.00000 | 0.00000 | ; |
| 52 | 50 | 51 | 55 | 3 | 0.65270 | 1.95811  | 0.00000  | -2.61082 | 0.00000 | 0.00000 | ; |
| 52 | 50 | 51 | 56 | 3 | 1.04600 | -1.04600 | 0.00000  | 0.00000  | 0.00000 | 0.00000 | ; |
| 53 | 50 | 51 | 54 | 3 | 0.65270 | 1.95811  | 0.00000  | -2.61082 | 0.00000 | 0.00000 | ; |
| 53 | 50 | 51 | 55 | 3 | 0.65270 | 1.95811  | 0.00000  | -2.61082 | 0.00000 | 0.00000 | ; |
| 53 | 50 | 51 | 56 | 3 | 1.04600 | -1.04600 | 0.00000  | 0.00000  | 0.00000 | 0.00000 | ; |
| 54 | 51 | 56 | 57 | 3 | 1.60247 | 4.80742  | 0.00000  | -6.40989 | 0.00000 | 0.00000 | ; |
| 55 | 51 | 56 | 57 | 3 | 1.60247 | 4.80742  | 0.00000  | -6.40989 | 0.00000 | 0.00000 | ; |
| 56 | 57 | 58 | 61 | 3 | 1.04600 | -1.04600 | 0.00000  | 0.00000  | 0.00000 | 0.00000 | ; |
| 56 | 57 | 58 | 62 | 3 | 1.04600 | -1.04600 | 0.00000  | 0.00000  | 0.00000 | 0.00000 | ; |
| 58 | 63 | 64 | 66 | 3 | 1.60247 | 4.80742  | 0.00000  | -6.40989 | 0.00000 | 0.00000 | ; |
| 58 | 63 | 64 | 67 | 3 | 1.60247 | 4.80742  | 0.00000  | -6.40989 | 0.00000 | 0.00000 | ; |
| 59 | 57 | 58 | 61 | 3 | 0.65270 | 1.95811  | 0.00000  | -2.61082 | 0.00000 | 0.00000 | ; |
| 59 | 57 | 58 | 62 | 3 | 0.65270 | 1.95811  | 0.00000  | -2.61082 | 0.00000 | 0.00000 | ; |
| 59 | 57 | 58 | 63 | 3 | 1.04600 | -1.04600 | 0.00000  | 0.00000  | 0.00000 | 0.00000 | ; |
| 60 | 57 | 58 | 61 | 3 | 0.65270 | 1.95811  | 0.00000  | -2.61082 | 0.00000 | 0.00000 | ; |
| 60 | 57 | 58 | 62 | 3 | 0.65270 | 1.95811  | 0.00000  | -2.61082 | 0.00000 | 0.00000 | ; |
| 60 | 57 | 58 | 63 | 3 | 1.04600 | -1.04600 | 0.00000  | 0.00000  | 0.00000 | 0.00000 | ; |
| 61 | 58 | 63 | 64 | 3 | 1.60247 | 4.80742  | 0.00000  | -6.40989 | 0.00000 | 0.00000 | ; |
| 62 | 58 | 63 | 64 | 3 | 1.60247 | 4.80742  | 0.00000  | -6.40989 | 0.00000 | 0.00000 | ; |
| 63 | 64 | 65 | 68 | 3 | 1.04600 | -1.04600 | 0.00000  | 0.00000  | 0.00000 | 0.00000 | ; |
| 63 | 64 | 65 | 69 | 3 | 1.04600 | -1.04600 | 0.00000  | 0.00000  | 0.00000 | 0.00000 | ; |
| 65 | 70 | 74 | 75 | 3 | 1.60247 | 4.80742  | 0.00000  | -6.40989 | 0.00000 | 0.00000 | ; |
| 65 | 70 | 74 | 76 | 3 | 1.60247 | 4.80742  | 0.00000  | -6.40989 | 0.00000 | 0.00000 | ; |
| 65 | 70 | 74 | 77 | 3 | 1.60247 | 4.80742  | 0.00000  | -6.40989 | 0.00000 | 0.00000 | ; |
| 66 | 64 | 65 | 68 | 3 | 0.65270 | 1.95811  | 0.00000  | -2.61082 | 0.00000 | 0.00000 | ; |
| 66 | 64 | 65 | 69 | 3 | 0.65270 | 1.95811  | 0.00000  | -2.61082 | 0.00000 | 0.00000 | ; |
| 66 | 64 | 65 | 70 | 3 | 1.04600 | -1.04600 | 0.00000  | 0.00000  | 0.00000 | 0.00000 | ; |
| 67 | 64 | 65 | 68 | 3 | 0.65270 | 1.95811  | 0.00000  | -2.61082 | 0.00000 | 0.00000 | ; |
| 67 | 64 | 65 | 69 | 3 | 0.65270 | 1.95811  | 0.00000  | -2.61082 | 0.00000 | 0.00000 | ; |
| 67 | 64 | 65 | 70 | 3 | 1.04600 | -1.04600 | 0.00000  | 0.00000  | 0.00000 | 0.00000 | ; |
| 68 | 65 | 70 | 74 | 3 | 1.60247 | 4.80742  | 0.00000  | -6.40989 | 0.00000 | 0.00000 | ; |
| 69 | 65 | 70 | 74 | 3 | 1.60247 | 4.80742  | 0.00000  | -6.40989 | 0.00000 | 0.00000 | ; |
| 1  | 2  | 7  | 8  | 3 | 2.43927 | 4.80742  | -0.83680 | -6.40989 | 0.00000 | 0.00000 | ; |
| 2  | 7  | 8  | 9  | 3 | 2.43927 | 4.80742  | -0.83680 | -6.40989 | 0.00000 | 0.00000 | ; |
| 71 | 1  | 2  | 7  | 3 | 0.65270 | 1.95811  | 0.00000  | -2.61082 | 0.00000 | 0.00000 | ; |

|    |    |    |    |   |         |         |          |          |         |         |   |
|----|----|----|----|---|---------|---------|----------|----------|---------|---------|---|
| 7  | 8  | 9  | 14 | 3 | 0.60250 | 1.80749 | 9.83240  | -2.40998 | 0.00000 | 0.00000 | ; |
| 8  | 9  | 14 | 15 | 3 | 2.43927 | 4.80742 | -0.83680 | -6.40989 | 0.00000 | 0.00000 | ; |
| 9  | 14 | 15 | 16 | 3 | 2.43927 | 4.80742 | -0.83680 | -6.40989 | 0.00000 | 0.00000 | ; |
| 14 | 15 | 16 | 21 | 3 | 0.60250 | 1.80749 | 9.83240  | -2.40998 | 0.00000 | 0.00000 | ; |
| 15 | 16 | 21 | 22 | 3 | 2.43927 | 4.80742 | -0.83680 | -6.40989 | 0.00000 | 0.00000 | ; |
| 16 | 21 | 22 | 23 | 3 | 2.43927 | 4.80742 | -0.83680 | -6.40989 | 0.00000 | 0.00000 | ; |
| 21 | 22 | 23 | 28 | 3 | 0.60250 | 1.80749 | 9.83240  | -2.40998 | 0.00000 | 0.00000 | ; |
| 22 | 23 | 28 | 29 | 3 | 2.43927 | 4.80742 | -0.83680 | -6.40989 | 0.00000 | 0.00000 | ; |
| 23 | 28 | 29 | 30 | 3 | 2.43927 | 4.80742 | -0.83680 | -6.40989 | 0.00000 | 0.00000 | ; |
| 28 | 29 | 30 | 35 | 3 | 0.60250 | 1.80749 | 9.83240  | -2.40998 | 0.00000 | 0.00000 | ; |
| 29 | 30 | 35 | 36 | 3 | 2.43927 | 4.80742 | -0.83680 | -6.40989 | 0.00000 | 0.00000 | ; |
| 30 | 35 | 36 | 37 | 3 | 2.43927 | 4.80742 | -0.83680 | -6.40989 | 0.00000 | 0.00000 | ; |
| 35 | 36 | 37 | 42 | 3 | 0.60250 | 1.80749 | 9.83240  | -2.40998 | 0.00000 | 0.00000 | ; |
| 36 | 37 | 42 | 43 | 3 | 2.43927 | 4.80742 | -0.83680 | -6.40989 | 0.00000 | 0.00000 | ; |
| 37 | 42 | 43 | 44 | 3 | 2.43927 | 4.80742 | -0.83680 | -6.40989 | 0.00000 | 0.00000 | ; |
| 42 | 43 | 44 | 49 | 3 | 0.60250 | 1.80749 | 9.83240  | -2.40998 | 0.00000 | 0.00000 | ; |
| 43 | 44 | 49 | 50 | 3 | 2.43927 | 4.80742 | -0.83680 | -6.40989 | 0.00000 | 0.00000 | ; |
| 44 | 49 | 50 | 51 | 3 | 2.43927 | 4.80742 | -0.83680 | -6.40989 | 0.00000 | 0.00000 | ; |
| 49 | 50 | 51 | 56 | 3 | 0.60250 | 1.80749 | 9.83240  | -2.40998 | 0.00000 | 0.00000 | ; |
| 50 | 51 | 56 | 57 | 3 | 2.43927 | 4.80742 | -0.83680 | -6.40989 | 0.00000 | 0.00000 | ; |
| 51 | 56 | 57 | 58 | 3 | 2.43927 | 4.80742 | -0.83680 | -6.40989 | 0.00000 | 0.00000 | ; |
| 56 | 57 | 58 | 63 | 3 | 0.60250 | 1.80749 | 9.83240  | -2.40998 | 0.00000 | 0.00000 | ; |
| 57 | 58 | 63 | 64 | 3 | 2.43927 | 4.80742 | -0.83680 | -6.40989 | 0.00000 | 0.00000 | ; |
| 58 | 63 | 64 | 65 | 3 | 2.43927 | 4.80742 | -0.83680 | -6.40989 | 0.00000 | 0.00000 | ; |
| 63 | 64 | 65 | 70 | 3 | 0.60250 | 1.80749 | 9.83240  | -2.40998 | 0.00000 | 0.00000 | ; |
| 64 | 65 | 70 | 74 | 3 | 2.43927 | 4.80742 | -0.83680 | -6.40989 | 0.00000 | 0.00000 | ; |



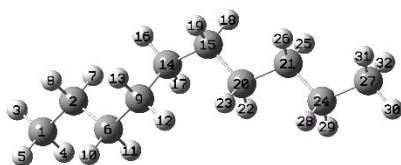

## n-decane.itp

[ atomtypes ]

| ;name | bond_type | mass   | charge | ptype | sigma       | epsilon     |
|-------|-----------|--------|--------|-------|-------------|-------------|
| c3    | c3        | 0.0000 | 0.0000 | A     | 3.39967e-01 | 4.57730e-01 |
| hc    | hc        | 0.0000 | 0.0000 | A     | 2.64953e-01 | 6.56888e-02 |

[ moleculetype ]

| ; monomer_name | nrexcl |
|----------------|--------|
| ECA            | 3      |

[ atoms ]

| ; atom_number | type | resnr | residue | atom | cgmr | charge   | mass      |
|---------------|------|-------|---------|------|------|----------|-----------|
| 1             | c3   | 1     | ECA     | C    | 1    | -0.09750 | 12.000000 |
| 2             | c3   | 1     | ECA     | C1   | 2    | 0.03990  | 12.000000 |
| 3             | hc   | 1     | ECA     | H    | 3    | 0.01940  | 1.000000  |
| 4             | hc   | 1     | ECA     | H1   | 4    | 0.01940  | 1.000000  |
| 5             | hc   | 1     | ECA     | H2   | 5    | 0.01940  | 1.000000  |
| 6             | c3   | 1     | ECA     | C2   | 6    | -0.02160 | 12.000000 |
| 7             | hc   | 1     | ECA     | H3   | 7    | 0.00390  | 1.000000  |
| 8             | hc   | 1     | ECA     | H4   | 8    | 0.00390  | 1.000000  |
| 9             | c3   | 1     | ECA     | C3   | 9    | -0.03450 | 12.000000 |
| 10            | hc   | 1     | ECA     | H5   | 10   | 0.01090  | 1.000000  |
| 11            | hc   | 1     | ECA     | H6   | 11   | 0.01090  | 1.000000  |
| 12            | hc   | 1     | ECA     | H7   | 12   | 0.01080  | 1.000000  |
| 13            | hc   | 1     | ECA     | H8   | 13   | 0.01080  | 1.000000  |
| 14            | c3   | 1     | ECA     | C4   | 14   | -0.00450 | 12.000000 |
| 15            | c3   | 1     | ECA     | C5   | 15   | -0.01930 | 12.000000 |
| 16            | hc   | 1     | ECA     | H9   | 16   | 0.00460  | 1.000000  |
| 17            | hc   | 1     | ECA     | H10  | 17   | 0.00460  | 1.000000  |
| 18            | hc   | 1     | ECA     | H11  | 18   | 0.00310  | 1.000000  |
| 19            | hc   | 1     | ECA     | H12  | 19   | 0.00310  | 1.000000  |
| 20            | c3   | 1     | ECA     | C6   | 20   | 0.00370  | 12.000000 |
| 21            | c3   | 1     | ECA     | C7   | 21   | -0.00750 | 12.000000 |
| 22            | hc   | 1     | ECA     | H13  | 22   | 0.00460  | 1.000000  |
| 23            | hc   | 1     | ECA     | H14  | 23   | 0.00460  | 1.000000  |
| 24            | c3   | 1     | ECA     | C8   | 24   | 0.04530  | 12.000000 |
| 25            | hc   | 1     | ECA     | H15  | 25   | 0.00390  | 1.000000  |
| 26            | hc   | 1     | ECA     | H16  | 26   | 0.00390  | 1.000000  |
| 27            | c3   | 1     | ECA     | C9   | 27   | -0.06900 | 12.000000 |
| 28            | hc   | 1     | ECA     | H17  | 28   | -0.00730 | 1.000000  |

|    |    |   |     |     |    |          |          |
|----|----|---|-----|-----|----|----------|----------|
| 29 | hc | 1 | ECA | H18 | 29 | -0.00730 | 1.000000 |
| 30 | hc | 1 | ECA | H19 | 30 | 0.01260  | 1.000000 |
| 31 | hc | 1 | ECA | H20 | 31 | 0.01260  | 1.000000 |
| 32 | hc | 1 | ECA | H21 | 32 | 0.01260  | 1.000000 |

[ bonds ]

| ; | at.i | at.j | funct | b0(nm)     | kb(kJ mol <sup>-1</sup> nm <sup>-2</sup> ) | at.i:atom_num_i |
|---|------|------|-------|------------|--------------------------------------------|-----------------|
|   | 1    | 3    | 1     | 1.0920e-01 | 2.8225e+05                                 |                 |
|   | 1    | 4    | 1     | 1.0920e-01 | 2.8225e+05                                 |                 |
|   | 1    | 5    | 1     | 1.0920e-01 | 2.8225e+05                                 |                 |
|   | 2    | 7    | 1     | 1.0920e-01 | 2.8225e+05                                 |                 |
|   | 2    | 8    | 1     | 1.0920e-01 | 2.8225e+05                                 |                 |
|   | 6    | 10   | 1     | 1.0920e-01 | 2.8225e+05                                 |                 |
|   | 6    | 11   | 1     | 1.0920e-01 | 2.8225e+05                                 |                 |
|   | 9    | 12   | 1     | 1.0920e-01 | 2.8225e+05                                 |                 |
|   | 9    | 13   | 1     | 1.0920e-01 | 2.8225e+05                                 |                 |
|   | 14   | 16   | 1     | 1.0920e-01 | 2.8225e+05                                 |                 |
|   | 14   | 17   | 1     | 1.0920e-01 | 2.8225e+05                                 |                 |
|   | 15   | 18   | 1     | 1.0920e-01 | 2.8225e+05                                 |                 |
|   | 15   | 19   | 1     | 1.0920e-01 | 2.8225e+05                                 |                 |
|   | 20   | 22   | 1     | 1.0920e-01 | 2.8225e+05                                 |                 |
|   | 20   | 23   | 1     | 1.0920e-01 | 2.8225e+05                                 |                 |
|   | 21   | 25   | 1     | 1.0920e-01 | 2.8225e+05                                 |                 |
|   | 21   | 26   | 1     | 1.0920e-01 | 2.8225e+05                                 |                 |
|   | 24   | 28   | 1     | 1.0920e-01 | 2.8225e+05                                 |                 |
|   | 24   | 29   | 1     | 1.0920e-01 | 2.8225e+05                                 |                 |
|   | 27   | 30   | 1     | 1.0920e-01 | 2.8225e+05                                 |                 |
|   | 27   | 31   | 1     | 1.0920e-01 | 2.8225e+05                                 |                 |
|   | 27   | 32   | 1     | 1.0920e-01 | 2.8225e+05                                 |                 |
|   | 1    | 2    | 1     | 1.5350e-01 | 2.5363e+05                                 |                 |
|   | 2    | 6    | 1     | 1.5350e-01 | 2.5363e+05                                 |                 |
|   | 6    | 9    | 1     | 1.5350e-01 | 2.5363e+05                                 |                 |
|   | 9    | 14   | 1     | 1.5350e-01 | 2.5363e+05                                 |                 |
|   | 14   | 15   | 1     | 1.5350e-01 | 2.5363e+05                                 |                 |
|   | 15   | 20   | 1     | 1.5350e-01 | 2.5363e+05                                 |                 |
|   | 20   | 21   | 1     | 1.5350e-01 | 2.5363e+05                                 |                 |
|   | 21   | 24   | 1     | 1.5350e-01 | 2.5363e+05                                 |                 |
|   | 24   | 27   | 1     | 1.5350e-01 | 2.5363e+05                                 |                 |

[ pairs ]

|   |    |   |
|---|----|---|
| 1 | 10 | 1 |
| 1 | 11 | 1 |
| 2 | 12 | 1 |
| 2 | 13 | 1 |

|    |    |   |
|----|----|---|
| 3  | 6  | 1 |
| 3  | 7  | 1 |
| 3  | 8  | 1 |
| 4  | 6  | 1 |
| 4  | 7  | 1 |
| 4  | 8  | 1 |
| 5  | 6  | 1 |
| 5  | 7  | 1 |
| 5  | 8  | 1 |
| 6  | 16 | 1 |
| 6  | 17 | 1 |
| 7  | 9  | 1 |
| 7  | 10 | 1 |
| 7  | 11 | 1 |
| 8  | 9  | 1 |
| 8  | 10 | 1 |
| 8  | 11 | 1 |
| 9  | 18 | 1 |
| 9  | 19 | 1 |
| 10 | 12 | 1 |
| 10 | 13 | 1 |
| 10 | 14 | 1 |
| 11 | 12 | 1 |
| 11 | 13 | 1 |
| 11 | 14 | 1 |
| 12 | 15 | 1 |
| 12 | 16 | 1 |
| 12 | 17 | 1 |
| 13 | 15 | 1 |
| 13 | 16 | 1 |
| 13 | 17 | 1 |
| 14 | 22 | 1 |
| 14 | 23 | 1 |
| 15 | 25 | 1 |
| 15 | 26 | 1 |
| 16 | 18 | 1 |
| 16 | 19 | 1 |
| 16 | 20 | 1 |
| 17 | 18 | 1 |
| 17 | 19 | 1 |
| 17 | 20 | 1 |
| 18 | 21 | 1 |
| 18 | 22 | 1 |
| 18 | 23 | 1 |

|    |    |   |
|----|----|---|
| 19 | 21 | 1 |
| 19 | 22 | 1 |
| 19 | 23 | 1 |
| 20 | 28 | 1 |
| 20 | 29 | 1 |
| 21 | 30 | 1 |
| 21 | 31 | 1 |
| 21 | 32 | 1 |
| 22 | 24 | 1 |
| 22 | 25 | 1 |
| 22 | 26 | 1 |
| 23 | 24 | 1 |
| 23 | 25 | 1 |
| 23 | 26 | 1 |
| 25 | 27 | 1 |
| 25 | 28 | 1 |
| 25 | 29 | 1 |
| 26 | 27 | 1 |
| 26 | 28 | 1 |
| 26 | 29 | 1 |
| 28 | 30 | 1 |
| 28 | 31 | 1 |
| 28 | 32 | 1 |
| 29 | 30 | 1 |
| 29 | 31 | 1 |
| 29 | 32 | 1 |
| 1  | 9  | 1 |
| 2  | 14 | 1 |
| 6  | 15 | 1 |
| 9  | 20 | 1 |
| 14 | 21 | 1 |
| 15 | 24 | 1 |
| 20 | 27 | 1 |

[ angles ]

| ; at.i | at.j | at.k | funct | theta(deg) | cth(kJ mol <sup>-1</sup> rad <sup>-2</sup> ) |
|--------|------|------|-------|------------|----------------------------------------------|
| 1      | 2    | 7    | 1     | 1.1005e+02 | 3.8802e+02                                   |
| 1      | 2    | 8    | 1     | 1.1005e+02 | 3.8802e+02                                   |
| 2      | 1    | 3    | 1     | 1.1005e+02 | 3.8802e+02                                   |
| 2      | 1    | 4    | 1     | 1.1005e+02 | 3.8802e+02                                   |
| 2      | 1    | 5    | 1     | 1.1005e+02 | 3.8802e+02                                   |
| 2      | 6    | 10   | 1     | 1.1005e+02 | 3.8802e+02                                   |
| 2      | 6    | 11   | 1     | 1.1005e+02 | 3.8802e+02                                   |
| 3      | 1    | 4    | 1     | 1.0835e+02 | 3.2995e+02                                   |

|    |    |    |   |            |            |
|----|----|----|---|------------|------------|
| 3  | 1  | 5  | 1 | 1.0835e+02 | 3.2995e+02 |
| 4  | 1  | 5  | 1 | 1.0835e+02 | 3.2995e+02 |
| 6  | 2  | 7  | 1 | 1.1005e+02 | 3.8802e+02 |
| 6  | 2  | 8  | 1 | 1.1005e+02 | 3.8802e+02 |
| 6  | 9  | 12 | 1 | 1.1005e+02 | 3.8802e+02 |
| 6  | 9  | 13 | 1 | 1.1005e+02 | 3.8802e+02 |
| 7  | 2  | 8  | 1 | 1.0835e+02 | 3.2995e+02 |
| 9  | 6  | 10 | 1 | 1.1005e+02 | 3.8802e+02 |
| 9  | 6  | 11 | 1 | 1.1005e+02 | 3.8802e+02 |
| 9  | 14 | 16 | 1 | 1.1005e+02 | 3.8802e+02 |
| 9  | 14 | 17 | 1 | 1.1005e+02 | 3.8802e+02 |
| 10 | 6  | 11 | 1 | 1.0835e+02 | 3.2995e+02 |
| 12 | 9  | 13 | 1 | 1.0835e+02 | 3.2995e+02 |
| 12 | 9  | 14 | 1 | 1.1005e+02 | 3.8802e+02 |
| 13 | 9  | 14 | 1 | 1.1005e+02 | 3.8802e+02 |
| 14 | 15 | 18 | 1 | 1.1005e+02 | 3.8802e+02 |
| 14 | 15 | 19 | 1 | 1.1005e+02 | 3.8802e+02 |
| 15 | 14 | 16 | 1 | 1.1005e+02 | 3.8802e+02 |
| 15 | 14 | 17 | 1 | 1.1005e+02 | 3.8802e+02 |
| 15 | 20 | 22 | 1 | 1.1005e+02 | 3.8802e+02 |
| 15 | 20 | 23 | 1 | 1.1005e+02 | 3.8802e+02 |
| 16 | 14 | 17 | 1 | 1.0835e+02 | 3.2995e+02 |
| 18 | 15 | 19 | 1 | 1.0835e+02 | 3.2995e+02 |
| 18 | 15 | 20 | 1 | 1.1005e+02 | 3.8802e+02 |
| 19 | 15 | 20 | 1 | 1.1005e+02 | 3.8802e+02 |
| 20 | 21 | 25 | 1 | 1.1005e+02 | 3.8802e+02 |
| 20 | 21 | 26 | 1 | 1.1005e+02 | 3.8802e+02 |
| 21 | 20 | 22 | 1 | 1.1005e+02 | 3.8802e+02 |
| 21 | 20 | 23 | 1 | 1.1005e+02 | 3.8802e+02 |
| 21 | 24 | 28 | 1 | 1.1005e+02 | 3.8802e+02 |
| 21 | 24 | 29 | 1 | 1.1005e+02 | 3.8802e+02 |
| 22 | 20 | 23 | 1 | 1.0835e+02 | 3.2995e+02 |
| 24 | 21 | 25 | 1 | 1.1005e+02 | 3.8802e+02 |
| 24 | 21 | 26 | 1 | 1.1005e+02 | 3.8802e+02 |
| 24 | 27 | 30 | 1 | 1.1005e+02 | 3.8802e+02 |
| 24 | 27 | 31 | 1 | 1.1005e+02 | 3.8802e+02 |
| 24 | 27 | 32 | 1 | 1.1005e+02 | 3.8802e+02 |
| 25 | 21 | 26 | 1 | 1.0835e+02 | 3.2995e+02 |
| 27 | 24 | 28 | 1 | 1.1005e+02 | 3.8802e+02 |
| 27 | 24 | 29 | 1 | 1.1005e+02 | 3.8802e+02 |
| 28 | 24 | 29 | 1 | 1.0835e+02 | 3.2995e+02 |
| 30 | 27 | 31 | 1 | 1.0835e+02 | 3.2995e+02 |
| 30 | 27 | 32 | 1 | 1.0835e+02 | 3.2995e+02 |
| 31 | 27 | 32 | 1 | 1.0835e+02 | 3.2995e+02 |

|    |    |    |   |            |            |
|----|----|----|---|------------|------------|
| 1  | 2  | 6  | 1 | 1.1063e+02 | 5.2894e+02 |
| 2  | 6  | 9  | 1 | 1.1063e+02 | 5.2894e+02 |
| 6  | 9  | 14 | 1 | 1.1063e+02 | 5.2894e+02 |
| 9  | 14 | 15 | 1 | 1.1063e+02 | 5.2894e+02 |
| 14 | 15 | 20 | 1 | 1.1063e+02 | 5.2894e+02 |
| 15 | 20 | 21 | 1 | 1.1063e+02 | 5.2894e+02 |
| 20 | 21 | 24 | 1 | 1.1063e+02 | 5.2894e+02 |
| 21 | 24 | 27 | 1 | 1.1063e+02 | 5.2894e+02 |

[ dihedrals ]

| ; | at.i | at.j | at.k | at.l | funct | C0(kJ mol <sup>-1</sup> ) | C1(kJ mol <sup>-1</sup> ) | C2(kJ mol <sup>-1</sup> ) | C3(kJ mol <sup>-1</sup> ) | C4(kJ mol <sup>-1</sup> ) | C5(kJ mol <sup>-1</sup> ) |
|---|------|------|------|------|-------|---------------------------|---------------------------|---------------------------|---------------------------|---------------------------|---------------------------|
|   | 1    | 2    | 6    | 10   | 3     | 0.66944                   | 2.00832                   | 0.00000                   | -2.67776                  | 0.00000                   | 0.00000 ;                 |
|   | 1    | 2    | 6    | 11   | 3     | 0.66944                   | 2.00832                   | 0.00000                   | -2.67776                  | 0.00000                   | 0.00000 ;                 |
|   | 2    | 6    | 9    | 12   | 3     | 0.66944                   | 2.00832                   | 0.00000                   | -2.67776                  | 0.00000                   | 0.00000 ;                 |
|   | 2    | 6    | 9    | 13   | 3     | 0.66944                   | 2.00832                   | 0.00000                   | -2.67776                  | 0.00000                   | 0.00000 ;                 |
|   | 3    | 1    | 2    | 6    | 3     | 0.66944                   | 2.00832                   | 0.00000                   | -2.67776                  | 0.00000                   | 0.00000 ;                 |
|   | 3    | 1    | 2    | 7    | 3     | 0.62760                   | 1.88280                   | 0.00000                   | -2.51040                  | 0.00000                   | 0.00000 ;                 |
|   | 3    | 1    | 2    | 8    | 3     | 0.62760                   | 1.88280                   | 0.00000                   | -2.51040                  | 0.00000                   | 0.00000 ;                 |
|   | 4    | 1    | 2    | 6    | 3     | 0.66944                   | 2.00832                   | 0.00000                   | -2.67776                  | 0.00000                   | 0.00000 ;                 |
|   | 4    | 1    | 2    | 7    | 3     | 0.62760                   | 1.88280                   | 0.00000                   | -2.51040                  | 0.00000                   | 0.00000 ;                 |
|   | 4    | 1    | 2    | 8    | 3     | 0.62760                   | 1.88280                   | 0.00000                   | -2.51040                  | 0.00000                   | 0.00000 ;                 |
|   | 5    | 1    | 2    | 6    | 3     | 0.66944                   | 2.00832                   | 0.00000                   | -2.67776                  | 0.00000                   | 0.00000 ;                 |
|   | 5    | 1    | 2    | 7    | 3     | 0.62760                   | 1.88280                   | 0.00000                   | -2.51040                  | 0.00000                   | 0.00000 ;                 |
|   | 5    | 1    | 2    | 8    | 3     | 0.62760                   | 1.88280                   | 0.00000                   | -2.51040                  | 0.00000                   | 0.00000 ;                 |
|   | 6    | 9    | 14   | 16   | 3     | 0.66944                   | 2.00832                   | 0.00000                   | -2.67776                  | 0.00000                   | 0.00000 ;                 |
|   | 6    | 9    | 14   | 17   | 3     | 0.66944                   | 2.00832                   | 0.00000                   | -2.67776                  | 0.00000                   | 0.00000 ;                 |
|   | 7    | 2    | 6    | 9    | 3     | 0.66944                   | 2.00832                   | 0.00000                   | -2.67776                  | 0.00000                   | 0.00000 ;                 |
|   | 7    | 2    | 6    | 10   | 3     | 0.62760                   | 1.88280                   | 0.00000                   | -2.51040                  | 0.00000                   | 0.00000 ;                 |
|   | 7    | 2    | 6    | 11   | 3     | 0.62760                   | 1.88280                   | 0.00000                   | -2.51040                  | 0.00000                   | 0.00000 ;                 |
|   | 8    | 2    | 6    | 9    | 3     | 0.66944                   | 2.00832                   | 0.00000                   | -2.67776                  | 0.00000                   | 0.00000 ;                 |
|   | 8    | 2    | 6    | 10   | 3     | 0.62760                   | 1.88280                   | 0.00000                   | -2.51040                  | 0.00000                   | 0.00000 ;                 |
|   | 8    | 2    | 6    | 11   | 3     | 0.62760                   | 1.88280                   | 0.00000                   | -2.51040                  | 0.00000                   | 0.00000 ;                 |
|   | 9    | 14   | 15   | 18   | 3     | 0.66944                   | 2.00832                   | 0.00000                   | -2.67776                  | 0.00000                   | 0.00000 ;                 |
|   | 9    | 14   | 15   | 19   | 3     | 0.66944                   | 2.00832                   | 0.00000                   | -2.67776                  | 0.00000                   | 0.00000 ;                 |
|   | 10   | 6    | 9    | 12   | 3     | 0.62760                   | 1.88280                   | 0.00000                   | -2.51040                  | 0.00000                   | 0.00000 ;                 |
|   | 10   | 6    | 9    | 13   | 3     | 0.62760                   | 1.88280                   | 0.00000                   | -2.51040                  | 0.00000                   | 0.00000 ;                 |
|   | 10   | 6    | 9    | 14   | 3     | 0.66944                   | 2.00832                   | 0.00000                   | -2.67776                  | 0.00000                   | 0.00000 ;                 |
|   | 11   | 6    | 9    | 12   | 3     | 0.62760                   | 1.88280                   | 0.00000                   | -2.51040                  | 0.00000                   | 0.00000 ;                 |
|   | 11   | 6    | 9    | 13   | 3     | 0.62760                   | 1.88280                   | 0.00000                   | -2.51040                  | 0.00000                   | 0.00000 ;                 |
|   | 11   | 6    | 9    | 14   | 3     | 0.66944                   | 2.00832                   | 0.00000                   | -2.67776                  | 0.00000                   | 0.00000 ;                 |
|   | 12   | 9    | 14   | 15   | 3     | 0.66944                   | 2.00832                   | 0.00000                   | -2.67776                  | 0.00000                   | 0.00000 ;                 |
|   | 12   | 9    | 14   | 16   | 3     | 0.62760                   | 1.88280                   | 0.00000                   | -2.51040                  | 0.00000                   | 0.00000 ;                 |
|   | 12   | 9    | 14   | 17   | 3     | 0.62760                   | 1.88280                   | 0.00000                   | -2.51040                  | 0.00000                   | 0.00000 ;                 |
|   | 13   | 9    | 14   | 15   | 3     | 0.66944                   | 2.00832                   | 0.00000                   | -2.67776                  | 0.00000                   | 0.00000 ;                 |

|    |    |    |    |   |         |         |          |          |         |           |
|----|----|----|----|---|---------|---------|----------|----------|---------|-----------|
| 13 | 9  | 14 | 16 | 3 | 0.62760 | 1.88280 | 0.00000  | -2.51040 | 0.00000 | 0.00000 ; |
| 13 | 9  | 14 | 17 | 3 | 0.62760 | 1.88280 | 0.00000  | -2.51040 | 0.00000 | 0.00000 ; |
| 14 | 15 | 20 | 22 | 3 | 0.66944 | 2.00832 | 0.00000  | -2.67776 | 0.00000 | 0.00000 ; |
| 14 | 15 | 20 | 23 | 3 | 0.66944 | 2.00832 | 0.00000  | -2.67776 | 0.00000 | 0.00000 ; |
| 15 | 20 | 21 | 25 | 3 | 0.66944 | 2.00832 | 0.00000  | -2.67776 | 0.00000 | 0.00000 ; |
| 15 | 20 | 21 | 26 | 3 | 0.66944 | 2.00832 | 0.00000  | -2.67776 | 0.00000 | 0.00000 ; |
| 16 | 14 | 15 | 18 | 3 | 0.62760 | 1.88280 | 0.00000  | -2.51040 | 0.00000 | 0.00000 ; |
| 16 | 14 | 15 | 19 | 3 | 0.62760 | 1.88280 | 0.00000  | -2.51040 | 0.00000 | 0.00000 ; |
| 16 | 14 | 15 | 20 | 3 | 0.66944 | 2.00832 | 0.00000  | -2.67776 | 0.00000 | 0.00000 ; |
| 17 | 14 | 15 | 18 | 3 | 0.62760 | 1.88280 | 0.00000  | -2.51040 | 0.00000 | 0.00000 ; |
| 17 | 14 | 15 | 19 | 3 | 0.62760 | 1.88280 | 0.00000  | -2.51040 | 0.00000 | 0.00000 ; |
| 17 | 14 | 15 | 20 | 3 | 0.66944 | 2.00832 | 0.00000  | -2.67776 | 0.00000 | 0.00000 ; |
| 18 | 15 | 20 | 21 | 3 | 0.66944 | 2.00832 | 0.00000  | -2.67776 | 0.00000 | 0.00000 ; |
| 18 | 15 | 20 | 22 | 3 | 0.62760 | 1.88280 | 0.00000  | -2.51040 | 0.00000 | 0.00000 ; |
| 18 | 15 | 20 | 23 | 3 | 0.62760 | 1.88280 | 0.00000  | -2.51040 | 0.00000 | 0.00000 ; |
| 19 | 15 | 20 | 21 | 3 | 0.66944 | 2.00832 | 0.00000  | -2.67776 | 0.00000 | 0.00000 ; |
| 19 | 15 | 20 | 22 | 3 | 0.62760 | 1.88280 | 0.00000  | -2.51040 | 0.00000 | 0.00000 ; |
| 19 | 15 | 20 | 23 | 3 | 0.62760 | 1.88280 | 0.00000  | -2.51040 | 0.00000 | 0.00000 ; |
| 20 | 21 | 24 | 28 | 3 | 0.66944 | 2.00832 | 0.00000  | -2.67776 | 0.00000 | 0.00000 ; |
| 20 | 21 | 24 | 29 | 3 | 0.66944 | 2.00832 | 0.00000  | -2.67776 | 0.00000 | 0.00000 ; |
| 21 | 24 | 27 | 30 | 3 | 0.66944 | 2.00832 | 0.00000  | -2.67776 | 0.00000 | 0.00000 ; |
| 21 | 24 | 27 | 31 | 3 | 0.66944 | 2.00832 | 0.00000  | -2.67776 | 0.00000 | 0.00000 ; |
| 21 | 24 | 27 | 32 | 3 | 0.66944 | 2.00832 | 0.00000  | -2.67776 | 0.00000 | 0.00000 ; |
| 22 | 20 | 21 | 24 | 3 | 0.66944 | 2.00832 | 0.00000  | -2.67776 | 0.00000 | 0.00000 ; |
| 22 | 20 | 21 | 25 | 3 | 0.62760 | 1.88280 | 0.00000  | -2.51040 | 0.00000 | 0.00000 ; |
| 22 | 20 | 21 | 26 | 3 | 0.62760 | 1.88280 | 0.00000  | -2.51040 | 0.00000 | 0.00000 ; |
| 23 | 20 | 21 | 24 | 3 | 0.66944 | 2.00832 | 0.00000  | -2.67776 | 0.00000 | 0.00000 ; |
| 23 | 20 | 21 | 25 | 3 | 0.62760 | 1.88280 | 0.00000  | -2.51040 | 0.00000 | 0.00000 ; |
| 23 | 20 | 21 | 26 | 3 | 0.62760 | 1.88280 | 0.00000  | -2.51040 | 0.00000 | 0.00000 ; |
| 25 | 21 | 24 | 27 | 3 | 0.66944 | 2.00832 | 0.00000  | -2.67776 | 0.00000 | 0.00000 ; |
| 25 | 21 | 24 | 28 | 3 | 0.62760 | 1.88280 | 0.00000  | -2.51040 | 0.00000 | 0.00000 ; |
| 25 | 21 | 24 | 29 | 3 | 0.62760 | 1.88280 | 0.00000  | -2.51040 | 0.00000 | 0.00000 ; |
| 26 | 21 | 24 | 27 | 3 | 0.66944 | 2.00832 | 0.00000  | -2.67776 | 0.00000 | 0.00000 ; |
| 26 | 21 | 24 | 28 | 3 | 0.62760 | 1.88280 | 0.00000  | -2.51040 | 0.00000 | 0.00000 ; |
| 26 | 21 | 24 | 29 | 3 | 0.62760 | 1.88280 | 0.00000  | -2.51040 | 0.00000 | 0.00000 ; |
| 28 | 24 | 27 | 30 | 3 | 0.62760 | 1.88280 | 0.00000  | -2.51040 | 0.00000 | 0.00000 ; |
| 28 | 24 | 27 | 31 | 3 | 0.62760 | 1.88280 | 0.00000  | -2.51040 | 0.00000 | 0.00000 ; |
| 28 | 24 | 27 | 32 | 3 | 0.62760 | 1.88280 | 0.00000  | -2.51040 | 0.00000 | 0.00000 ; |
| 29 | 24 | 27 | 30 | 3 | 0.62760 | 1.88280 | 0.00000  | -2.51040 | 0.00000 | 0.00000 ; |
| 29 | 24 | 27 | 31 | 3 | 0.62760 | 1.88280 | 0.00000  | -2.51040 | 0.00000 | 0.00000 ; |
| 29 | 24 | 27 | 32 | 3 | 0.62760 | 1.88280 | 0.00000  | -2.51040 | 0.00000 | 0.00000 ; |
| 1  | 2  | 6  | 9  | 3 | 3.68192 | 3.09616 | -2.09200 | -3.01248 | 0.00000 | 0.00000 ; |
| 2  | 6  | 9  | 14 | 3 | 3.68192 | 3.09616 | -2.09200 | -3.01248 | 0.00000 | 0.00000 ; |
| 6  | 9  | 14 | 15 | 3 | 3.68192 | 3.09616 | -2.09200 | -3.01248 | 0.00000 | 0.00000 ; |

|    |    |    |    |   |         |         |          |          |         |           |
|----|----|----|----|---|---------|---------|----------|----------|---------|-----------|
| 9  | 14 | 15 | 20 | 3 | 3.68192 | 3.09616 | -2.09200 | -3.01248 | 0.00000 | 0.00000 ; |
| 14 | 15 | 20 | 21 | 3 | 3.68192 | 3.09616 | -2.09200 | -3.01248 | 0.00000 | 0.00000 ; |
| 15 | 20 | 21 | 24 | 3 | 3.68192 | 3.09616 | -2.09200 | -3.01248 | 0.00000 | 0.00000 ; |
| 20 | 21 | 24 | 27 | 3 | 3.68192 | 3.09616 | -2.09200 | -3.01248 | 0.00000 | 0.00000 ; |



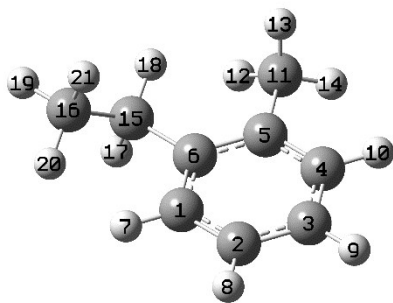

## MEBE.itp

[ atomtypes ]

| ;name | bond_type | mass   | charge | ptype | sigma       | epsilon     |
|-------|-----------|--------|--------|-------|-------------|-------------|
| hc    | hc        | 0.0000 | 0.0000 | A     | 2.64953e-01 | 6.56888e-02 |
| c3    | c3        | 0.0000 | 0.0000 | A     | 3.39967e-01 | 4.57730e-01 |
| ha    | ha        | 0.0000 | 0.0000 | A     | 2.59964e-01 | 6.27600e-02 |
| ca    | ca        | 0.0000 | 0.0000 | A     | 3.39967e-01 | 3.59824e-01 |

[ moleculetype ]

| ;monomer_name | nrexcl |
|---------------|--------|
| EBE           | 3      |

[ atoms ]

| ;atom_number | type | resnr | residue | atom | cgmr | charge   | mass      |
|--------------|------|-------|---------|------|------|----------|-----------|
| 1            | ca   | 1     | EBE     | C    | 1    | -0.19520 | 12.000000 |
| 2            | ca   | 1     | EBE     | C1   | 2    | -0.18060 | 12.000000 |
| 3            | ca   | 1     | EBE     | C2   | 3    | -0.15160 | 12.000000 |
| 4            | ca   | 1     | EBE     | C3   | 4    | -0.22640 | 12.000000 |
| 5            | ca   | 1     | EBE     | C4   | 5    | 0.07550  | 12.000000 |
| 6            | ca   | 1     | EBE     | C5   | 6    | 0.03990  | 12.000000 |
| 7            | ha   | 1     | EBE     | H    | 7    | 0.14570  | 1.000000  |
| 8            | ha   | 1     | EBE     | H1   | 8    | 0.15100  | 1.000000  |
| 9            | ha   | 1     | EBE     | H2   | 9    | 0.14710  | 1.000000  |
| 10           | ha   | 1     | EBE     | H3   | 10   | 0.15360  | 1.000000  |
| 11           | c3   | 1     | EBE     | C6   | 11   | -0.16840 | 12.000000 |
| 12           | hc   | 1     | EBE     | H4   | 12   | 0.05460  | 1.000000  |
| 13           | hc   | 1     | EBE     | H5   | 13   | 0.05460  | 1.000000  |
| 14           | hc   | 1     | EBE     | H6   | 14   | 0.05460  | 1.000000  |
| 15           | c3   | 1     | EBE     | C7   | 15   | -0.01510 | 12.000000 |
| 16           | c3   | 1     | EBE     | C8   | 16   | -0.07110 | 12.000000 |
| 17           | hc   | 1     | EBE     | H7   | 17   | 0.03530  | 1.000000  |
| 18           | hc   | 1     | EBE     | H8   | 18   | 0.03530  | 1.000000  |
| 19           | hc   | 1     | EBE     | H9   | 19   | 0.02040  | 1.000000  |
| 20           | hc   | 1     | EBE     | H10  | 20   | 0.02040  | 1.000000  |
| 21           | hc   | 1     | EBE     | H11  | 21   | 0.02040  | 1.000000  |

[ bonds ]

| ; | at.i | at.j | funct | b0(nm)     | kb(kJ mol <sup>-1</sup> nm <sup>-2</sup> ) | at.i:atom_num_i |
|---|------|------|-------|------------|--------------------------------------------|-----------------|
|   | 1    | 7    | 1     | 1.0870e-01 | 2.8811e+05                                 |                 |
|   | 2    | 8    | 1     | 1.0870e-01 | 2.8811e+05                                 |                 |
|   | 3    | 9    | 1     | 1.0870e-01 | 2.8811e+05                                 |                 |
|   | 4    | 10   | 1     | 1.0870e-01 | 2.8811e+05                                 |                 |
|   | 11   | 12   | 1     | 1.0920e-01 | 2.8225e+05                                 |                 |
|   | 11   | 13   | 1     | 1.0920e-01 | 2.8225e+05                                 |                 |
|   | 11   | 14   | 1     | 1.0920e-01 | 2.8225e+05                                 |                 |
|   | 15   | 17   | 1     | 1.0920e-01 | 2.8225e+05                                 |                 |
|   | 15   | 18   | 1     | 1.0920e-01 | 2.8225e+05                                 |                 |
|   | 16   | 19   | 1     | 1.0920e-01 | 2.8225e+05                                 |                 |
|   | 16   | 20   | 1     | 1.0920e-01 | 2.8225e+05                                 |                 |
|   | 16   | 21   | 1     | 1.0920e-01 | 2.8225e+05                                 |                 |
|   | 1    | 2    | 1     | 1.3870e-01 | 4.0033e+05                                 |                 |
|   | 1    | 6    | 1     | 1.3870e-01 | 4.0033e+05                                 |                 |
|   | 2    | 3    | 1     | 1.3870e-01 | 4.0033e+05                                 |                 |
|   | 3    | 4    | 1     | 1.3870e-01 | 4.0033e+05                                 |                 |
|   | 4    | 5    | 1     | 1.3870e-01 | 4.0033e+05                                 |                 |
|   | 5    | 6    | 1     | 1.3870e-01 | 4.0033e+05                                 |                 |
|   | 5    | 11   | 1     | 1.5130e-01 | 2.7070e+05                                 |                 |
|   | 6    | 15   | 1     | 1.5130e-01 | 2.7070e+05                                 |                 |
|   | 15   | 16   | 1     | 1.5350e-01 | 2.5363e+05                                 |                 |

[ pairs ]

| ; | at.i | at.j | funct |
|---|------|------|-------|
|   | 1    | 9    | 1     |
|   | 1    | 17   | 1     |
|   | 1    | 18   | 1     |
|   | 2    | 10   | 1     |
|   | 7    | 3    | 1     |
|   | 4    | 8    | 1     |
|   | 4    | 12   | 1     |
|   | 4    | 13   | 1     |
|   | 4    | 14   | 1     |
|   | 5    | 9    | 1     |
|   | 7    | 5    | 1     |
|   | 5    | 17   | 1     |
|   | 5    | 18   | 1     |
|   | 6    | 8    | 1     |
|   | 6    | 10   | 1     |
|   | 6    | 12   | 1     |
|   | 6    | 13   | 1     |
|   | 6    | 14   | 1     |
|   | 6    | 19   | 1     |

|    |    |   |
|----|----|---|
| 6  | 20 | 1 |
| 6  | 21 | 1 |
| 7  | 8  | 1 |
| 7  | 15 | 1 |
| 8  | 9  | 1 |
| 9  | 10 | 1 |
| 10 | 11 | 1 |
| 17 | 19 | 1 |
| 17 | 20 | 1 |
| 17 | 21 | 1 |
| 18 | 19 | 1 |
| 18 | 20 | 1 |
| 18 | 21 | 1 |
| 1  | 4  | 1 |
| 1  | 11 | 1 |
| 1  | 16 | 1 |
| 2  | 5  | 1 |
| 2  | 15 | 1 |
| 6  | 3  | 1 |
| 3  | 11 | 1 |
| 4  | 15 | 1 |
| 5  | 16 | 1 |
| 11 | 15 | 1 |

[ angles ]

| ; at.i | at.j | at.k | funct | theta(deg) | cth(kJ mol <sup>-1</sup> rad <sup>-2</sup> ) |
|--------|------|------|-------|------------|----------------------------------------------|
| 1      | 2    | 8    | 1     | 1.2001e+02 | 4.0551e+02                                   |
| 2      | 1    | 7    | 1     | 1.2001e+02 | 4.0551e+02                                   |
| 2      | 3    | 9    | 1     | 1.2001e+02 | 4.0551e+02                                   |
| 3      | 2    | 8    | 1     | 1.2001e+02 | 4.0551e+02                                   |
| 3      | 4    | 10   | 1     | 1.2001e+02 | 4.0551e+02                                   |
| 4      | 3    | 9    | 1     | 1.2001e+02 | 4.0551e+02                                   |
| 5      | 4    | 10   | 1     | 1.2001e+02 | 4.0551e+02                                   |
| 5      | 11   | 12   | 1     | 1.1015e+02 | 3.9296e+02                                   |
| 5      | 11   | 13   | 1     | 1.1015e+02 | 3.9296e+02                                   |
| 5      | 11   | 14   | 1     | 1.1015e+02 | 3.9296e+02                                   |
| 6      | 1    | 7    | 1     | 1.2001e+02 | 4.0551e+02                                   |
| 6      | 15   | 17   | 1     | 1.1015e+02 | 3.9296e+02                                   |
| 6      | 15   | 18   | 1     | 1.1015e+02 | 3.9296e+02                                   |
| 12     | 11   | 13   | 1     | 1.0835e+02 | 3.2995e+02                                   |
| 12     | 11   | 14   | 1     | 1.0835e+02 | 3.2995e+02                                   |
| 13     | 11   | 14   | 1     | 1.0835e+02 | 3.2995e+02                                   |
| 15     | 16   | 19   | 1     | 1.1005e+02 | 3.8802e+02                                   |
| 15     | 16   | 20   | 1     | 1.1005e+02 | 3.8802e+02                                   |

|    |    |    |   |            |            |
|----|----|----|---|------------|------------|
| 15 | 16 | 21 | 1 | 1.1005e+02 | 3.8802e+02 |
| 16 | 15 | 17 | 1 | 1.1005e+02 | 3.8802e+02 |
| 16 | 15 | 18 | 1 | 1.1005e+02 | 3.8802e+02 |
| 17 | 15 | 18 | 1 | 1.0835e+02 | 3.2995e+02 |
| 19 | 16 | 20 | 1 | 1.0835e+02 | 3.2995e+02 |
| 19 | 16 | 21 | 1 | 1.0835e+02 | 3.2995e+02 |
| 20 | 16 | 21 | 1 | 1.0835e+02 | 3.2995e+02 |
| 1  | 2  | 3  | 1 | 1.1997e+02 | 5.6216e+02 |
| 1  | 6  | 5  | 1 | 1.1997e+02 | 5.6216e+02 |
| 1  | 6  | 15 | 1 | 1.2063e+02 | 5.3421e+02 |
| 2  | 1  | 6  | 1 | 1.1997e+02 | 5.6216e+02 |
| 2  | 3  | 4  | 1 | 1.1997e+02 | 5.6216e+02 |
| 3  | 4  | 5  | 1 | 1.1997e+02 | 5.6216e+02 |
| 4  | 5  | 6  | 1 | 1.1997e+02 | 5.6216e+02 |
| 4  | 5  | 11 | 1 | 1.2063e+02 | 5.3421e+02 |
| 5  | 6  | 15 | 1 | 1.2063e+02 | 5.3421e+02 |
| 6  | 5  | 11 | 1 | 1.2063e+02 | 5.3421e+02 |
| 6  | 15 | 16 | 1 | 1.1209e+02 | 5.2928e+02 |

[ dihedrals ]

| ; | at.i | at.j | at.k | at.l | funct | C0(kJ mol <sup>-1</sup> ) | C1(kJ mol <sup>-1</sup> ) | C2(kJ mol <sup>-1</sup> ) | C3(kJ mol <sup>-1</sup> ) | C4(kJ mol <sup>-1</sup> ) | C5(kJ mol <sup>-1</sup> ) | ; |
|---|------|------|------|------|-------|---------------------------|---------------------------|---------------------------|---------------------------|---------------------------|---------------------------|---|
|   | 1    | 2    | 3    | 9    | 3     | 30.33400                  | 0.00000                   | -30.33400                 | 0.00000                   | 0.00000                   | 0.00000                   | ; |
|   | 1    | 6    | 15   | 17   | 3     | 0.00000                   | 0.00000                   | 0.00000                   | 0.00000                   | 0.00000                   | 0.00000                   | ; |
|   | 1    | 6    | 15   | 18   | 3     | 0.00000                   | 0.00000                   | 0.00000                   | 0.00000                   | 0.00000                   | 0.00000                   | ; |
|   | 2    | 3    | 4    | 10   | 3     | 30.33400                  | 0.00000                   | -30.33400                 | 0.00000                   | 0.00000                   | 0.00000                   | ; |
|   | 7    | 1    | 2    | 3    | 3     | 30.33400                  | 0.00000                   | -30.33400                 | 0.00000                   | 0.00000                   | 0.00000                   | ; |
|   | 4    | 3    | 2    | 8    | 3     | 30.33400                  | 0.00000                   | -30.33400                 | 0.00000                   | 0.00000                   | 0.00000                   | ; |
|   | 4    | 5    | 11   | 12   | 3     | 0.00000                   | 0.00000                   | 0.00000                   | 0.00000                   | 0.00000                   | 0.00000                   | ; |
|   | 4    | 5    | 11   | 13   | 3     | 0.00000                   | 0.00000                   | 0.00000                   | 0.00000                   | 0.00000                   | 0.00000                   | ; |
|   | 4    | 5    | 11   | 14   | 3     | 0.00000                   | 0.00000                   | 0.00000                   | 0.00000                   | 0.00000                   | 0.00000                   | ; |
|   | 5    | 4    | 3    | 9    | 3     | 30.33400                  | 0.00000                   | -30.33400                 | 0.00000                   | 0.00000                   | 0.00000                   | ; |
|   | 7    | 1    | 6    | 5    | 3     | 30.33400                  | 0.00000                   | -30.33400                 | 0.00000                   | 0.00000                   | 0.00000                   | ; |
|   | 5    | 6    | 15   | 17   | 3     | 0.00000                   | 0.00000                   | 0.00000                   | 0.00000                   | 0.00000                   | 0.00000                   | ; |
|   | 5    | 6    | 15   | 18   | 3     | 0.00000                   | 0.00000                   | 0.00000                   | 0.00000                   | 0.00000                   | 0.00000                   | ; |
|   | 6    | 1    | 2    | 8    | 3     | 30.33400                  | 0.00000                   | -30.33400                 | 0.00000                   | 0.00000                   | 0.00000                   | ; |
|   | 6    | 5    | 4    | 10   | 3     | 30.33400                  | 0.00000                   | -30.33400                 | 0.00000                   | 0.00000                   | 0.00000                   | ; |
|   | 6    | 5    | 11   | 12   | 3     | 0.00000                   | 0.00000                   | 0.00000                   | 0.00000                   | 0.00000                   | 0.00000                   | ; |
|   | 6    | 5    | 11   | 13   | 3     | 0.00000                   | 0.00000                   | 0.00000                   | 0.00000                   | 0.00000                   | 0.00000                   | ; |
|   | 6    | 5    | 11   | 14   | 3     | 0.00000                   | 0.00000                   | 0.00000                   | 0.00000                   | 0.00000                   | 0.00000                   | ; |
|   | 6    | 15   | 16   | 19   | 3     | 0.65270                   | 1.95811                   | 0.00000                   | -2.61082                  | 0.00000                   | 0.00000                   | ; |
|   | 6    | 15   | 16   | 20   | 3     | 0.65270                   | 1.95811                   | 0.00000                   | -2.61082                  | 0.00000                   | 0.00000                   | ; |
|   | 6    | 15   | 16   | 21   | 3     | 0.65270                   | 1.95811                   | 0.00000                   | -2.61082                  | 0.00000                   | 0.00000                   | ; |
|   | 7    | 1    | 2    | 8    | 3     | 30.33400                  | 0.00000                   | -30.33400                 | 0.00000                   | 0.00000                   | 0.00000                   | ; |
|   | 7    | 1    | 6    | 15   | 3     | 30.33400                  | 0.00000                   | -30.33400                 | 0.00000                   | 0.00000                   | 0.00000                   | ; |

|    |    |    |    |   |          |         |           |          |         |         |   |
|----|----|----|----|---|----------|---------|-----------|----------|---------|---------|---|
| 8  | 2  | 3  | 9  | 3 | 30.33400 | 0.00000 | -30.33400 | 0.00000  | 0.00000 | 0.00000 | ; |
| 9  | 3  | 4  | 10 | 3 | 30.33400 | 0.00000 | -30.33400 | 0.00000  | 0.00000 | 0.00000 | ; |
| 10 | 4  | 5  | 11 | 3 | 30.33400 | 0.00000 | -30.33400 | 0.00000  | 0.00000 | 0.00000 | ; |
| 17 | 15 | 16 | 19 | 3 | 0.62760  | 1.88280 | 0.00000   | -2.51040 | 0.00000 | 0.00000 | ; |
| 17 | 15 | 16 | 20 | 3 | 0.62760  | 1.88280 | 0.00000   | -2.51040 | 0.00000 | 0.00000 | ; |
| 17 | 15 | 16 | 21 | 3 | 0.62760  | 1.88280 | 0.00000   | -2.51040 | 0.00000 | 0.00000 | ; |
| 18 | 15 | 16 | 19 | 3 | 0.62760  | 1.88280 | 0.00000   | -2.51040 | 0.00000 | 0.00000 | ; |
| 18 | 15 | 16 | 20 | 3 | 0.62760  | 1.88280 | 0.00000   | -2.51040 | 0.00000 | 0.00000 | ; |
| 18 | 15 | 16 | 21 | 3 | 0.62760  | 1.88280 | 0.00000   | -2.51040 | 0.00000 | 0.00000 | ; |
| 7  | 1  | 6  | 2  | 3 | 9.20480  | 0.00000 | -9.20480  | 0.00000  | 0.00000 | 0.00000 | ; |
| 1  | 3  | 2  | 8  | 3 | 9.20480  | 0.00000 | -9.20480  | 0.00000  | 0.00000 | 0.00000 | ; |
| 2  | 4  | 3  | 9  | 3 | 9.20480  | 0.00000 | -9.20480  | 0.00000  | 0.00000 | 0.00000 | ; |
| 3  | 5  | 4  | 10 | 3 | 9.20480  | 0.00000 | -9.20480  | 0.00000  | 0.00000 | 0.00000 | ; |
| 1  | 2  | 3  | 4  | 3 | 30.33400 | 0.00000 | -30.33400 | 0.00000  | 0.00000 | 0.00000 | ; |
| 1  | 6  | 5  | 4  | 3 | 30.33400 | 0.00000 | -30.33400 | 0.00000  | 0.00000 | 0.00000 | ; |
| 1  | 6  | 5  | 11 | 3 | 30.33400 | 0.00000 | -30.33400 | 0.00000  | 0.00000 | 0.00000 | ; |
| 1  | 6  | 15 | 16 | 3 | 0.00000  | 0.00000 | 0.00000   | 0.00000  | 0.00000 | 0.00000 | ; |
| 2  | 1  | 6  | 5  | 3 | 30.33400 | 0.00000 | -30.33400 | 0.00000  | 0.00000 | 0.00000 | ; |
| 2  | 1  | 6  | 15 | 3 | 30.33400 | 0.00000 | -30.33400 | 0.00000  | 0.00000 | 0.00000 | ; |
| 2  | 3  | 4  | 5  | 3 | 30.33400 | 0.00000 | -30.33400 | 0.00000  | 0.00000 | 0.00000 | ; |
| 6  | 1  | 2  | 3  | 3 | 30.33400 | 0.00000 | -30.33400 | 0.00000  | 0.00000 | 0.00000 | ; |
| 3  | 4  | 5  | 6  | 3 | 30.33400 | 0.00000 | -30.33400 | 0.00000  | 0.00000 | 0.00000 | ; |
| 3  | 4  | 5  | 11 | 3 | 30.33400 | 0.00000 | -30.33400 | 0.00000  | 0.00000 | 0.00000 | ; |
| 4  | 5  | 6  | 15 | 3 | 30.33400 | 0.00000 | -30.33400 | 0.00000  | 0.00000 | 0.00000 | ; |
| 5  | 6  | 15 | 16 | 3 | 0.00000  | 0.00000 | 0.00000   | 0.00000  | 0.00000 | 0.00000 | ; |
| 11 | 5  | 6  | 15 | 3 | 30.33400 | 0.00000 | -30.33400 | 0.00000  | 0.00000 | 0.00000 | ; |
| 4  | 6  | 5  | 11 | 3 | 9.20480  | 0.00000 | -9.20480  | 0.00000  | 0.00000 | 0.00000 | ; |
| 15 | 1  | 6  | 5  | 3 | 9.20480  | 0.00000 | -9.20480  | 0.00000  | 0.00000 | 0.00000 | ; |
